# Supplementary material for: Hydroxy-directed peptide bond formation from α-amino acid-derived inert esters enabled by boronic acid catalysis
Source: Royal Society of Chemistry journal article supplement (doi:10.1039/d3cc04856j), 2023-12-13

## Supporting Information

### Hydroxy-directed peptide bond formation from $\alpha$ -amino acid-derived inert esters enabled by boronic acid catalysis

Naoya Takahashi,<sup>†</sup> Airi Takahashi,<sup>‡</sup> Naoyuki Shimada<sup>\*‡</sup>

<sup>†</sup>Laboratory of Organic Chemistry for Drug Development and Medical Research Laboratories, Department of Pharmaceutical Sciences, Kitasato University, Tokyo 108-8641, Japan

<sup>‡</sup>Laboratory of Organic Chemistry for Molecular Transformations, Department of Chemistry and the Institute of Natural Sciences, Nihon University, Tokyo 156-8550, Japan

\* E-mail: shimada.naoyuki@nihon-u.ac.jp

#### Table of Contents

|                                                                                                                                                                                                                    |     |
|--------------------------------------------------------------------------------------------------------------------------------------------------------------------------------------------------------------------|-----|
| 1. General information                                                                                                                                                                                             | S2  |
| 2. Screening of organoboron catalysts                                                                                                                                                                              | S3  |
| 3. Supplemental data for the catalytic peptide bond formation using $\beta$ -hydroxy- $\alpha$ -amino esters catalyzed by <b>1i</b>                                                                                | S5  |
| 4. Preparation of amino esters <b>3</b>                                                                                                                                                                            | S7  |
| 5. Procedure for the catalytic peptide bond formation of $\beta$ -hydroxy- $\alpha$ -amino esters and characterization of $\beta$ -hydroxy- $\alpha$ -amino ester-derived dipeptides <b>4</b> (Scheme 2, Scheme 3) | S8  |
| 6. Competition experiment (Scheme 4A)                                                                                                                                                                              | S21 |
| 7. Detection of presumed reaction intermediate (Scheme 4B)                                                                                                                                                         | S22 |
| 8. Application to the catalytic synthesis of oligopeptides (Scheme 4C)                                                                                                                                             | S25 |
| 9. References                                                                                                                                                                                                      | S29 |
| 10. <sup>1</sup> H and <sup>13</sup> C NMR spectra                                                                                                                                                                 | S30 |

## 1. General information

Melting points (mp) were obtained on AS ONE ATM-02 melting point apparatus. IR spectra were recorded on an FT/IR460-plus IR spectrometer and absorbance bands are reported in wavenumber ( $\text{cm}^{-1}$ ). Optical rotation was recorded on a JASCO DIP-1000 polarimeter and reported as follows:  $[\alpha]_D$ , concentration (g/100 mL), and solvent. NMR spectra were recorded on Agilent Technologies 400-MR DD2 (400 MHz for  $^1\text{H}$ , 100 MHz for  $^{13}\text{C}$ ), 400-MR (400 MHz for  $^1\text{H}$ , 100 MHz for  $^{13}\text{C}$ ), JEOL EX-270 spectrometer (270 MHz for  $^1\text{H}$ ), JEOL JNM ECP-500 spectrometer (500 MHz for  $^1\text{H}$ , 126 MHz for  $^{13}\text{C}$ ).  $^1\text{H}$  NMR data are reported as follows; chemical shift in parts per million (ppm) downfield or upfield from  $\text{CDCl}_3$  ( $\delta$  7.26), integration, multiplicity (br = broad, s = singlet, d = doublet, t = triplet, quint = quintet, dd = double doublet, ddd = double double doublet, dt = double triplet, and m = multiplet), and coupling constants (Hz).  $^{13}\text{C}$  NMR chemical shifts are reported in ppm downfield or upfield from  $\text{CDCl}_3$  ( $\delta$  77.0). Mass spectra were measured with JEOL JMS-AX505HA, JMS-700 MStation, and JEOL JMS-T100LP spectrometers. Thin-layer chromatography (TLC) was carried out on Merck 60F-254 or Fuji NH KP20610 (NH) precoated silica gel plates and were visualized by fluorescence quenching under UV light. Column chromatography was performed using Silica Gel 60N (spherical, neutral, 63-210  $\mu\text{m}$ ) (Kanto Chemical Co., Inc.). Analytical high performance liquid chromatography (HPLC) was performed on a JASCO PU-2089 intelligent HPLC pump with JASCO UV-2075 intelligent UV/VIS detector. Detection was performed at 254 nm. CHIRALPAKR IA (f 0.46 cm  $\times$  25 cm) from Daicel were used. Retention times ( $t_R$ ) and peak ratios were determined with ChromNAV. Air- and/or moisture-sensitive reactions were carried out under nitrogen atmosphere using oven-dried glassware. 2-bromo-4-(trifluoromethyl)phenylboronic acid (**1i**), *N*-protecting serine or threonine derivatives **2a–2d**, amino esters **3m**, and amino esters HCl salt **3a–3l**, **3n–3r**·HCl were purchased. Molecular sieves 4A was finely ground in mortar and heated with a microwave oven (2 min for 3 times) and then placed under vacuum for 10 min prior to use.

## 2. Screening of organoboron catalysts

### SI-Scheme 1.

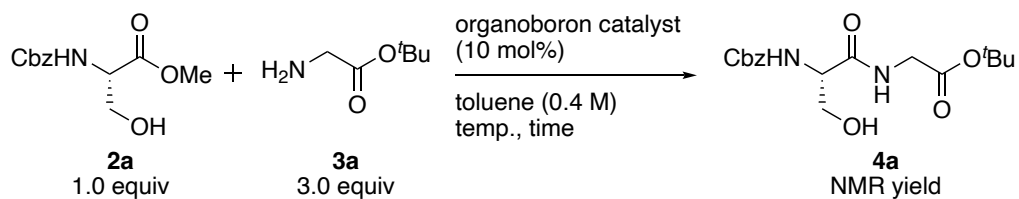

90 °C, 4 h

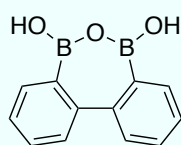

**1a**  
61%

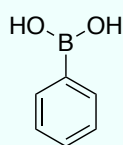

**1b**  
64%

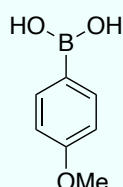

**1c**  
66%

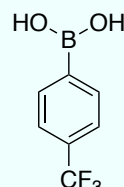

**1d**  
>99%

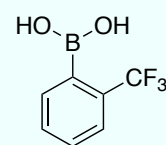

**1e**  
69%

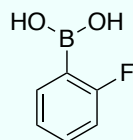

**1f**  
>99%

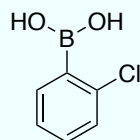

**1g**  
>99%

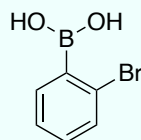

**1h**  
>99%

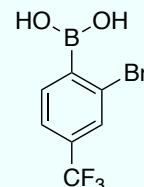

**1i**  
>99%

without catalyst

4%

60 °C, 24 h

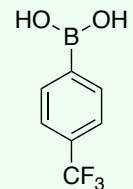

**1d**  
99%, 95% ee

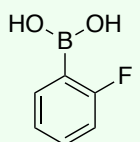

**1f**  
92%, 98% ee

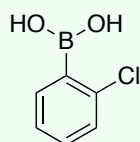

**1g**  
93%, 97% ee

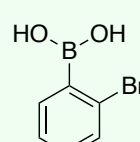

**1h**  
95%, 99% ee

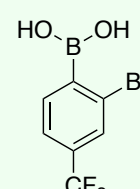

**1i**  
99%, 97% ee

40 °C, 24 h

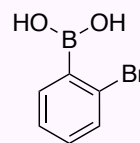

**1h**  
66%, 98% ee

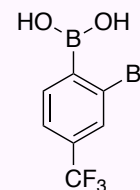

**1i**  
78%, >99% ee

**SI-Scheme 2.**

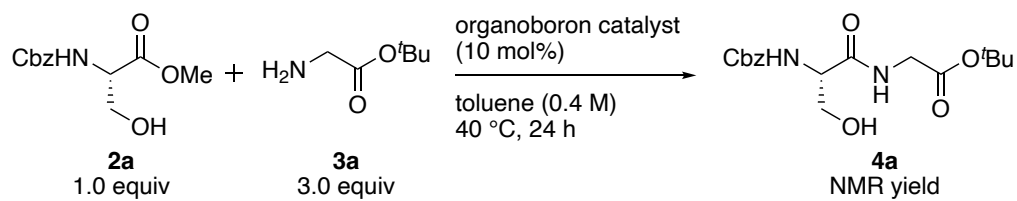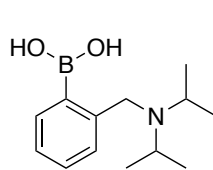

**SI-1**  
12%, -

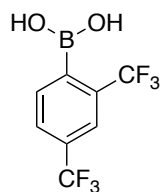

**SI-2**  
63%, 98% ee

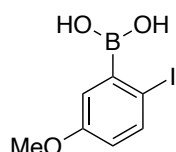

**SI-3**  
64%, 97% ee

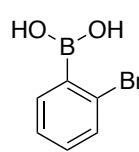

**1h**  
66%, 98% ee

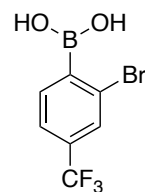

**1i**  
78%, >99% ee

**3. Supplemental data for the catalytic peptide bond formation using  $\beta$ -hydroxy- $\alpha$ -amino esters catalyzed by **1i****

**SI-Table 1. Optimization of amino ester 3 equivalent**

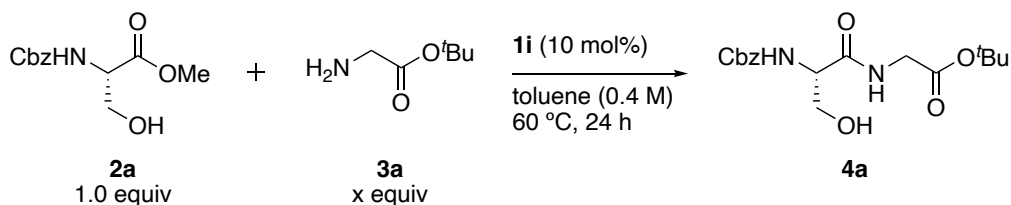

| entry    | x (equiv)  | yield (%) <sup>a</sup>    | ee (%) <sup>b</sup> |
|----------|------------|---------------------------|---------------------|
| 1        | 1.0        | 60                        | 98                  |
| 2        | 1.5        | 92                        | 98                  |
| <b>3</b> | <b>3.0</b> | <b>99[96]<sup>c</sup></b> | <b>97</b>           |

<sup>a</sup>Determined by <sup>1</sup>H NMR of a crude mixture of products.

<sup>b</sup>Determined by chiral HPLC analysis.

<sup>c</sup>Isolated yield.

**SI-Table 2. Effect of solvent**

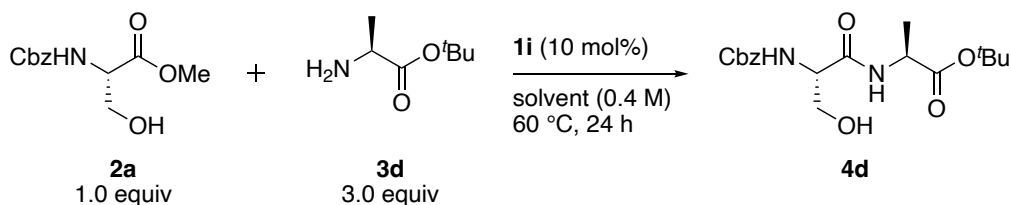

| entry    | solvent        | yield (%) <sup>a</sup> |
|----------|----------------|------------------------|
| <b>1</b> | <b>toluene</b> | <b>79</b>              |
| 2        | DCE            | 51                     |
| 3        | CPME           | 57                     |
| 4        | EtOAc          | 34                     |

<sup>a</sup>Determined by <sup>1</sup>H NMR of a crude mixture of products.

<sup>b</sup>Isolated yield.

DCE = 1,2-dichloroethane

CPME = cyclopentyl methyl ether

SI-Table 3. Optimization of reaction temperature

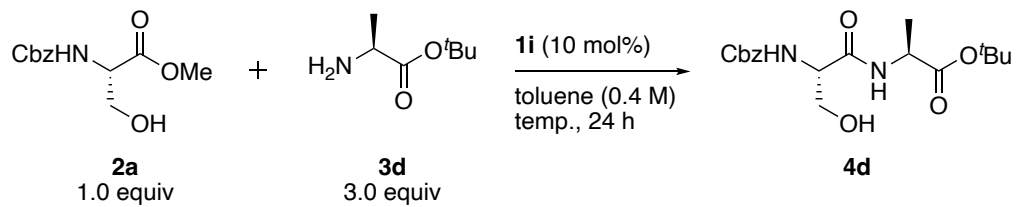

| entry    | temp. (°C) | yield (%) <sup>a</sup>    | dr <sup>b</sup> |
|----------|------------|---------------------------|-----------------|
| 1        | 40         | 28                        | >99 : 1         |
| 2        | 60         | 79                        | 99 : 1          |
| 3        | 70         | 82                        | 98 : 2          |
| <b>4</b> | <b>80</b>  | <b>96[89]<sup>c</sup></b> | <b>97 : 3</b>   |
| 5        | 90         | 97                        | 92 : 8          |

<sup>a</sup>Determined by <sup>1</sup>H NMR of a crude mixture of products.

<sup>b</sup>Determined by chiral HPLC analysis.

<sup>c</sup>Isolated yield.

#### 4. Preparation of amino esters **3**

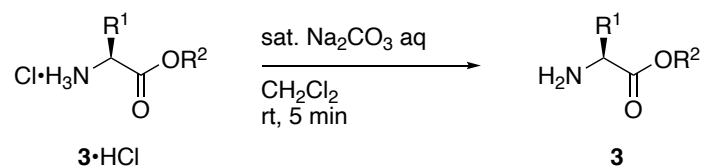

Sat.  $\text{Na}_2\text{CO}_3$  aq (3.0 mL) was added to a solution of amino ester hydrochloric salt **3**•HCl (0.9 mmol) in  $\text{CH}_2\text{Cl}_2$  (3.0 mL) at room temperature. After stirring for 5 min, the reaction mixture was separated and aqueous layer was extracted three times with  $\text{CH}_2\text{Cl}_2$ . The combined organic layer was washed with brine and dried over  $\text{Na}_2\text{SO}_4$ . Filtration and concentration under reduced pressure furnished the crude product of **3**, which was used for the reactions without further purification.

**5. Procedure for the catalytic peptide bond formation of  $\beta$ -hydroxy- $\alpha$ -amino esters and characterization of  $\beta$ -hydroxy- $\alpha$ -amino ester-derived dipeptides **4** (Scheme 2, Scheme 3)**

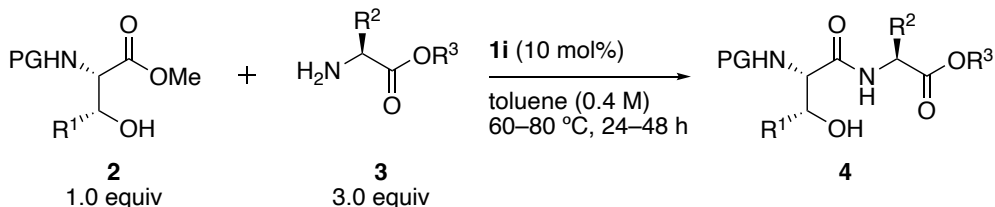

**General Procedure A**

Boronic acid **1i** (5.38 mg, 20.0  $\mu$ mol, 10.0 mol%) was added to a solution of  $N$ -protecting serine or threonine derivative **2** (0.200 mmol, 1.0 equiv) and amino ester **3** (0.600 mmol, 3.0 equiv) in toluene (0.5 mL, 0.40 M) at room temperature. After stirring for 24–48 h at 60–80 °C, the reaction mixture was cooled to room temperature. The reaction mixture was quenched by 1 M HCl and the resulting mixture was extracted with CH<sub>2</sub>Cl<sub>2</sub>. The combined organic layer was successively washed with sat. NaHCO<sub>3</sub> aq., H<sub>2</sub>O, brine, dried over Na<sub>2</sub>SO<sub>4</sub>, filtered, and concentrated in vacuo. The crude material was purified by silica gel column chromatography to give the corresponding dipeptide **4**.

**General Procedure B**

Boronic acid **1i** (5.38 mg, 20.0  $\mu$ mol, 10.0 mol%) was added to a solution of  $N$ -protecting serine derivative **2** (0.200 mmol, 1.0 equiv) and amino ester **3** (0.600 mmol, 3.0 equiv) in toluene (0.5 mL, 0.40 M) at room temperature. After stirring for 24–48 h at 80 °C, the reaction mixture was cooled to room temperature. Concentration under reduced pressure furnished the crude product, which was purified by silica gel column chromatography to give the corresponding dipeptide **4**.

**General Procedure C**

Boronic acid **1i** (5.38 mg, 20.0  $\mu$ mol, 10.0 mol%) was added to a solution of  $N$ -protecting serine derivative **2** (0.200 mmol, 1.0 equiv) and HCl salt of amino ester **3** (0.600 mmol, 3.0 equiv) in toluene (0.5 mL, 0.40 M) in the presence of MS 4A (400 mg/0.200 mmol) at room temperature. After stirring for 24 h at 80 °C, the reaction mixture was cooled to room temperature and filtered through a pad of Celite with EtOAc. Concentration under reduced pressure furnished the crude product, which was purified by silica gel column chromatography to give the corresponding dipeptide **4**.

Authentic samples of peptides were prepared from L-, D- or DL-amino acids, and used as references for HPLC analysis.



### Cbz-Ser-Gly-O<sup>t</sup>Bu (**4a**)<sup>1</sup>

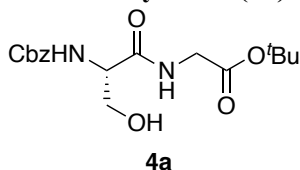

Compound **4a** was prepared according to the procedure A from Cbz-Ser-OMe (**2a**) (50.7 mg, 0.200 mmol) and H-Gly-O<sup>t</sup>Bu (**3a**) (78.7 mg, 0.600 mmol) at 60 °C for 24 h. Yield 96% (67.7 mg, 0.192 mmol,

97% ee). Purified by column chromatography (silica gel, 4:1 CH<sub>2</sub>Cl<sub>2</sub>/EtOAc). Data for **4a**; colorless oil;  $R_f = 0.27$  (CH<sub>2</sub>Cl<sub>2</sub>/EtOAc = 2:1);  $[\alpha]_D^{25} -6.3^\circ$  ( $c = 1.0$ , CHCl<sub>3</sub>); IR (neat)  $\nu = 3379, 3017, 2352, 1720, 1527, 1370, 1217, 1158, 1063, 757 \text{ cm}^{-1}$ ; <sup>1</sup>H NMR (270 MHz, CDCl<sub>3</sub>)  $\delta$  7.39–7.31 (m, 5H), 6.99 (br, 1H), 5.90 (d,  $J = 7.3 \text{ Hz}$ , 1H), 5.13 (s, 2H), 4.30 (br, 1H), 4.08 (dd,  $J = 11.3, 2.4 \text{ Hz}$ , 1H), 3.93 (d,  $J = 5.4 \text{ Hz}$ , 2H), 3.68 (dd,  $J = 11.3, 5.1 \text{ Hz}$ , 1H), 2.92 (br, 1H), 1.46 (s, 9H); <sup>13</sup>C NMR (126 MHz, CDCl<sub>3</sub>)  $\delta$  171.2, 169.0, 156.4, 136.0, 128.5, 128.3, 128.1, 82.7, 67.3, 63.0, 55.7, 42.1, 28.0; HRMS (ESI)  $m/z$  calcd for C<sub>17</sub>H<sub>24</sub>N<sub>2</sub>NaO<sub>6</sub> [M+Na]<sup>+</sup> 375.1532, found 375.1528.

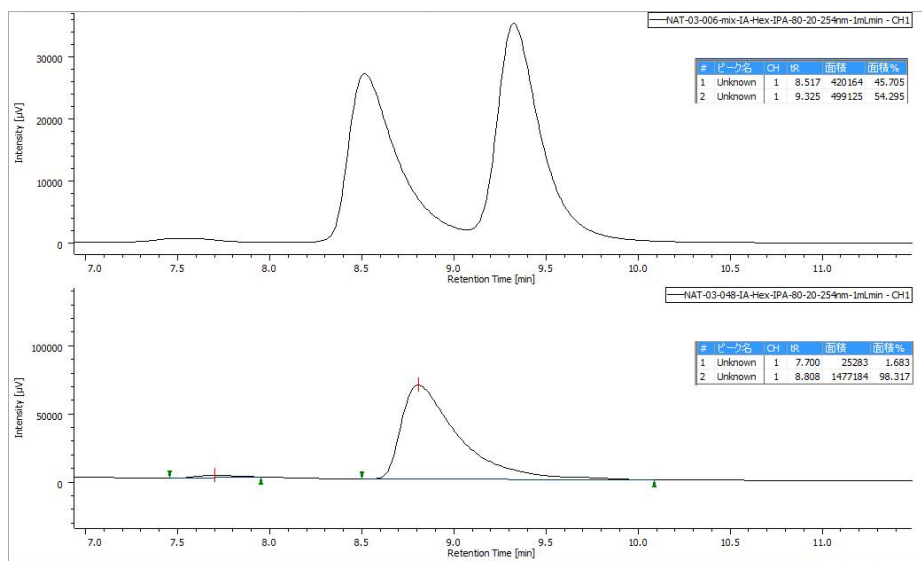

The ee was determined by chiral HPLC analysis [CHIRALPAK IA(  $\phi$  0.46 cm  $\times$  25 cm), hexane / IPA = 80 : 20, 254 nm, flow rate 1.0 mL/min,  $t^R = 7.7 \text{ min}$  (minor), 8.8 min (major) ]

### Boc-Ser-Gly-OBn (**4b**)<sup>1</sup>

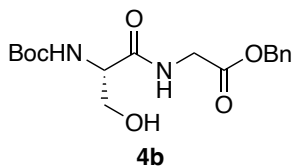

Compound **4b** was prepared according to the procedure A from Boc-Ser-OMe (**2b**) (43.8 mg, 0.200 mmol) and H-Gly-OBn (**3b**) (99.1 mg, 0.600 mmol) at 60 °C for 24 h. Yield 62% (43.8 mg, 0.124 mmol, 98%

ee). Purified by column chromatography (silica gel, 4:1 CH<sub>2</sub>Cl<sub>2</sub>/EtOAc). Data for **4b**; colorless oil; R<sub>f</sub> = 0.28 (CH<sub>2</sub>Cl<sub>2</sub>/EtOAc = 2:1); [α]<sub>D</sub><sup>25</sup> -9.1° (c = 1.0, CHCl<sub>3</sub>); IR (neat) ν = 3667, 3316, 2979, 2448, 1746, 1538, 1392, 1164, 1058, 852, 758 cm<sup>-1</sup>; <sup>1</sup>H NMR (500 MHz, CDCl<sub>3</sub>) δ 7.40–7.33 (m, 5H), 7.03 (br, 1H), 5.51 (br, 1H), 5.20 (d, *J* = 12.0 Hz, 1H), 5.17 (d, *J* = 12.0 Hz, 1H), 4.21 (br, 1H), 4.16–4.12 (m, 2H), 4.05 (dd, *J* = 18.5, 5.5 Hz, 1H), 3.66 (dd, *J* = 11.0, 4.5 Hz, 1H) 1.55 (s, 9H); <sup>13</sup>C NMR (100 MHz, CDCl<sub>3</sub>) δ 171.9, 169.7, 156.0, 135.0, 128.7, 128.6, 128.4, 80.6, 67.4, 63.0, 55.1, 41.4, 28.3; HRMS (ESI) *m/z* calcd. for C<sub>17</sub>H<sub>24</sub>N<sub>2</sub>Na<sub>1</sub>O<sub>6</sub>[M+Na]<sup>+</sup> 375.1532, found 375.1535.

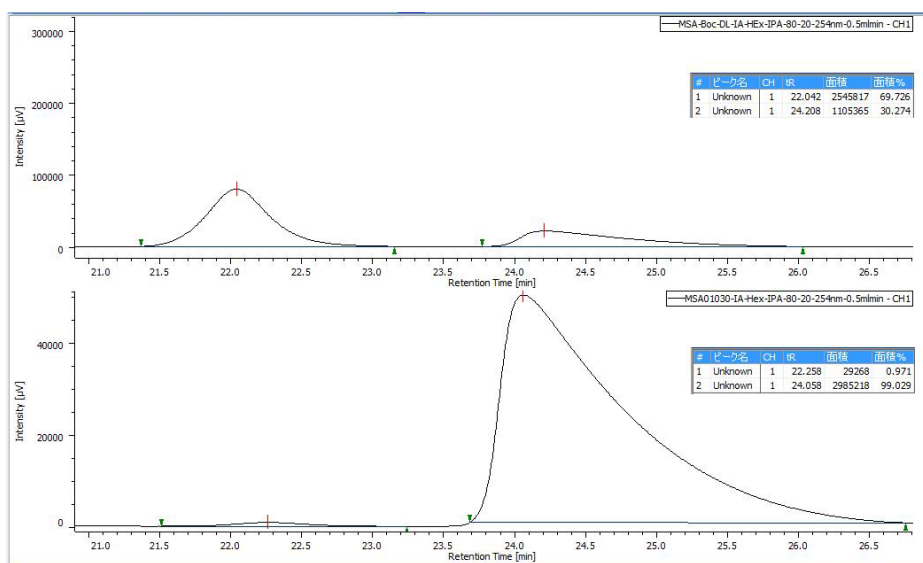

The ee was determined by chiral HPLC analysis [CHIRALPAK IA (φ 0.46 cm × 25 cm), hexane / IPA = 80 : 20, 254 nm, flow rate 0.5 mL/min, t<sup>R</sup> = 22.3 min (minor), 24.1 min (major) ]

### Fmoc-Ser-Gly-OEt (**4c**)<sup>1</sup>

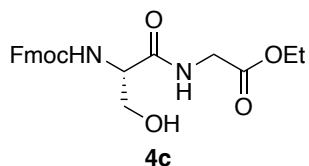

Compound **4c** was prepared according to the procedure A from Fmoc-Ser-OMe (**2c**) (68.3 mg, 0.200 mmol) and H-Gly-OEt (**3c**) (61.9 mg, 0.600 mmol) at 60 °C for 24 h. Yield 65% (53.7 mg, 0.130 mmol, 96% ee). Purified by column chromatography (silica gel, 2:1 CH<sub>2</sub>Cl<sub>2</sub>/EtOAc). Data for **4c**; white solid;  $R_f = 0.28$  (CH<sub>2</sub>Cl<sub>2</sub>/EtOAc = 2:1);  $[\alpha]_D^{25} -10.1^\circ$  ( $c = 1.0$ , CHCl<sub>3</sub>); IR (KBr)  $\nu = 3067, 2889, 1930, 1584, 1448, 1296, 1220, 1116, 929, 726, 570$  cm<sup>-1</sup>; <sup>1</sup>H NMR (270 MHz, CDCl<sub>3</sub>)  $\delta$  7.77 (d,  $J = 7.3$  Hz, 2H), 7.59 (d,  $J = 7.3$  Hz, 2H), 7.41 (t,  $J = 7.3$  Hz, 2H), 7.32 (t,  $J = 7.3$  Hz, 2H), 6.87 (br, 1H), 5.81–5.77 (m, 1H), 4.46 (d,  $J = 6.8$  Hz, 1H), 4.25–4.17 (m, 5H), 4.04 (d,  $J = 5.7$  Hz, 1H), 3.72–3.66 (m, 1H), 1.28 (t,  $J = 7.0$  Hz, 3H); <sup>13</sup>C NMR (126 MHz, CDCl<sub>3</sub>)  $\delta$  171.3, 170.0, 156.5, 143.6, 141.3, 127.8, 127.7, 127.1, 125.0, 124.0, 120.1, 120.0, 67.3, 62.9, 61.8, 55.7, 47.0, 41.4, 14.0; HRMS (ESI)  $m/z$  calcd. for C<sub>22</sub>H<sub>24</sub>N<sub>2</sub>Na<sub>1</sub>O<sub>6</sub>[M+Na]<sup>+</sup> 435.1532, found 435.1525.

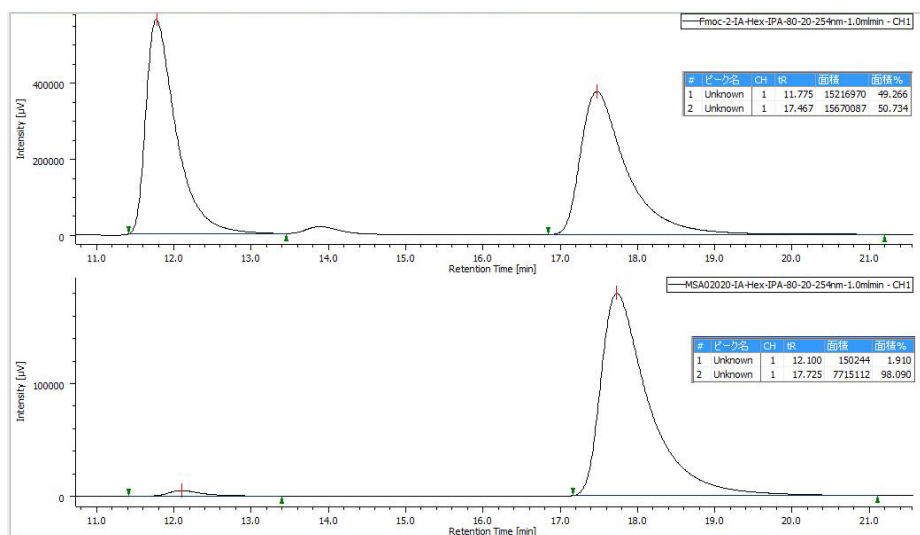

The ee was determined by chiral HPLC analysis [CHIRALPAK IA(  $\phi$  0.46 cm  $\times$  25 cm), hexane / IPA = 80 : 20, 254 nm, flow rate 1.0 mL/min,  $t_R = 12.1$  min (minor), 17.7 min (major) ]

#### Cbz-Ser-Ala-O<sup>t</sup>Bu (**4d**)<sup>1</sup>

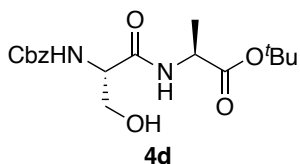

Compound **4d** was prepared according to the procedure A from Cbz-Ser-OMe (**2a**) (50.7 mg, 0.200 mmol) and H-Ala-O<sup>t</sup>Bu (**3d**) (87.1 mg, 0.600 mmol) at 80 °C for 24 h. Yield 89% (65.4 mg, 0.179 mmol).

Purified by column chromatography (silica gel, 3:1 CH<sub>2</sub>Cl<sub>2</sub>/EtOAc). Data for **4d**; yellow oil;  $R_f = 0.26$  (CH<sub>2</sub>Cl<sub>2</sub>/EtOAc = 3:1);  $[\alpha]_D^{25} -4.5^\circ$  ( $c = 1.0$ , CHCl<sub>3</sub>); IR (neat)  $\nu = 3413, 2981, 1722, 1520, 1370, 1218, 1151, 1059, 846, 757$  cm<sup>-1</sup>; <sup>1</sup>H NMR (500 MHz, CDCl<sub>3</sub>)  $\delta$  7.36–7.28 (m, 5H), 7.08 (br, 1H), 5.92 (d,  $J = 7.5$  Hz, 1H), 5.11 (s, 2H), 4.43 (quint,  $J = 7.5$  Hz, 1H), 4.30 (br, 1H), 4.00 (dd,  $J = 11.0, 2.5$  Hz, 1H), 3.67 (dd,  $J = 11.0, 6.0$  Hz, 1H), 1.45 (s, 9H), 1.35 (d,  $J = 7.5$  Hz, 3H); <sup>13</sup>C NMR (126 MHz, CDCl<sub>3</sub>)  $\delta$  172.1, 170.4, 156.3, 136.0, 128.5, 128.2, 128.0, 82.4, 67.1, 63.0, 55.5, 48.9, 27.9, 17.8; HRMS (ESI)  $m/z$  calcd. for C<sub>18</sub>H<sub>26</sub>N<sub>2</sub>NaO<sub>6</sub>[M+Na]<sup>+</sup> 389.1689, found 389.1677.

#### Cbz-Ser-Val-OMe (**4e**)<sup>1</sup>

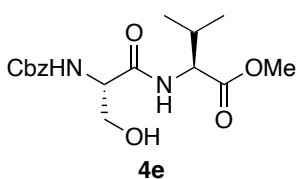

Condition A: Compound **4e** was prepared according to the procedure A from Cbz-Ser-OMe (**2a**) (50.7 mg, 0.200 mmol) and H-Val-OMe (**3e**) (78.7 mg, 0.600 mmol) at 80 °C for 24 h. Yield >99% (69.8 mg, 0.198 mmol). Purified by column chromatography (silica gel, 4:1

CH<sub>2</sub>Cl<sub>2</sub>/EtOAc). Condition B: Compound **4e** was also prepared according to the procedure C from Cbz-Ser-OMe (**2a**) (50.7 mg, 0.200 mmol) and H-Val-OMe·HCl (**3e**·HCl) (100.6 mg, 0.600 mmol) at 80 °C for 24 h. Yield 81% (57.1 mg, 0.162 mmol). Purified by column chromatography (silica gel, 4:1 CH<sub>2</sub>Cl<sub>2</sub>/EtOAc). Data for **4e**; colorless oil;  $R_f = 0.31$  (CH<sub>2</sub>Cl<sub>2</sub>/EtOAc = 2:1);  $[\alpha]_D^{25} -9.7^\circ$  ( $c = 1.0$ , CHCl<sub>3</sub>); IR (neat)  $\nu = 3670, 3330, 2966, 2448, 1669, 1531, 1216, 1147, 1061, 752$  cm<sup>-1</sup>; <sup>1</sup>H NMR (500 MHz, CDCl<sub>3</sub>)  $\delta$  7.36–7.30 (m, 5H), 6.90 (d,  $J = 8.5$  Hz, 1H), 5.82 (d,  $J = 7.0$  Hz, 1H), 5.16 (d,  $J = 12.5$  Hz, 1H), 5.11 (d,  $J = 12.5$  Hz, 1H), 4.50 (dd,  $J = 8.5, 4.5$  Hz, 1H), 4.29–4.26 (m, 1H), 4.10 (dd,  $J = 11.5, 3.0$  Hz, 1H), 3.75 (s, 3H), 3.66 (dd,  $J = 11.5, 5.5$  Hz, 1H), 2.23–2.14 (m, 1H), 0.91 (d,  $J = 7.0$  Hz, 3H), 0.87 (d,  $J = 7.0$  Hz, 3H); <sup>13</sup>C NMR (126 MHz, CDCl<sub>3</sub>)  $\delta$  172.3, 171.1, 156.6, 136.0, 128.5, 128.2, 128.0, 67.2, 62.8, 57.4, 55.1, 52.3, 30.7, 19.0, 17.6; HRMS (ESI)  $m/z$  calcd. for C<sub>17</sub>H<sub>24</sub>N<sub>2</sub>NaO<sub>6</sub>[M+Na]<sup>+</sup> 375.1532, found 375.1528.

**Cbz-Ser-Val-OMe (4e)<sup>1</sup>: 1 mmol scale reaction**

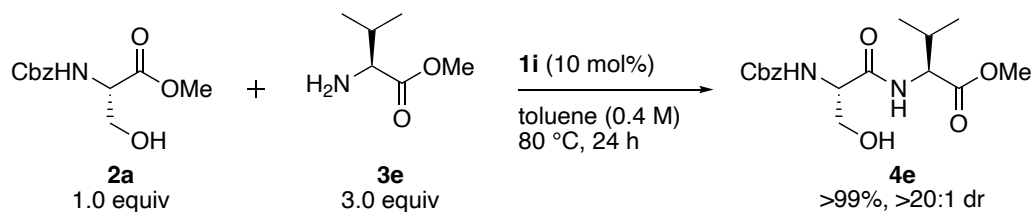

Boronic acid **1i** (26.9 mg, 0.100 mol, 10.0 mol %) was added to a solution of Cbz-Ser-OMe (**2a**) (253.3 mg, 1.00 mmol, 1.0 equiv) and H-Val-OMe (**3e**) (393.5 mg, 3.00 mmol, 3.0 equiv) in toluene (2.5 mL, 0.40 M) at room temperature. After stirring for 24 h at 80 °C, the reaction mixture was cooled to room temperature. The reaction mixture was quenched by 1 M HCl and the resulting mixture was extracted with CH<sub>2</sub>Cl<sub>2</sub>. The combined organic layer was successively washed with sat. NaHCO<sub>3</sub> aq., H<sub>2</sub>O, brine, dried over Na<sub>2</sub>SO<sub>4</sub>, filtered, and concentration in vacuo. The crude material was purified by silica gel column chromatography (4:1 CH<sub>2</sub>Cl<sub>2</sub>/EtOAc) to give Cbz-Ser-Val-OMe (**4e**) (351.4 mg, 0.997 mmol, >99%, >20:1 dr) as a colorless oil.

### Cbz-Ser-Leu-OMe (**4f**)<sup>1</sup>

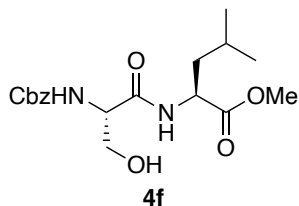

Compound **4f** was prepared according to the procedure A from Cbz-Ser-OMe (**2a**) (50.7 mg, 0.200 mmol) and H-Leu-OMe (**3f**) (87.1 mg, 0.600 mmol) at 80 °C for 24 h. Yield 94% (68.8 mg, 0.188 mmol). Purified by column chromatography (silica gel, 4:1 CH<sub>2</sub>Cl<sub>2</sub>/EtOAc).

Data for **4f**; colorless oil;  $R_f = 0.33$  (CH<sub>2</sub>Cl<sub>2</sub>/EtOAc = 2:1);  $[\alpha]_D^{26} -10.1^\circ$  ( $c = 1.0$ , CHCl<sub>3</sub>); IR (neat)  $\nu = 3420, 2958, 1722, 1670, 1512, 1439, 1346, 1216, 1151, 1062, 763$  cm<sup>-1</sup>; <sup>1</sup>H NMR (400 MHz, CDCl<sub>3</sub>)  $\delta$  7.38–7.30 (m, 5H), 6.79 (br, 1H), 5.80 (d,  $J = 6.8$  Hz, 1H), 5.14 (d,  $J = 12.4$  Hz, 1H), 5.11 (d,  $J = 12.4$  Hz, 1H), 4.61–4.55 (m, 1H), 4.30–4.26 (m, 1H), 4.06 (dd,  $J = 11.2, 2.8$  Hz, 1H), 3.74 (s, 3H), 3.65 (dd,  $J = 11.2, 6.0$  Hz, 1H), 3.28 (br, 1H), 1.69–1.51 (m, 3H), 0.92 (d,  $J = 6.4$  Hz, 3H), 0.91 (d,  $J = 6.4$  Hz, 3H); <sup>13</sup>C NMR (100 MHz, CDCl<sub>3</sub>)  $\delta$  173.5, 170.9, 156.4, 136.0, 128.5, 128.2, 128.0, 67.2, 63.0, 55.2, 52.5, 51.1, 40.7, 24.8, 22.8, 21.6; HRMS (ESI)  $m/z$  calcd. for C<sub>18</sub>H<sub>26</sub>N<sub>2</sub>NaO<sub>6</sub>[M+Na]<sup>+</sup> 389.1689, found 389.1666.

### Cbz-Ser-Ile-OMe (**4g**)<sup>2</sup>

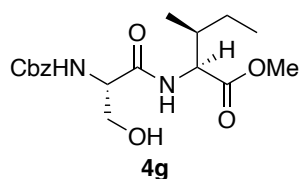

Compound **4g** was prepared according to the procedure A from Cbz-Ser-OMe (**2a**) (50.7 mg, 0.200 mmol) and H-Ile-OMe (**3g**) (87.1 mg, 0.600 mmol) at 80 °C for 24 h. Yield 87% (63.8 mg, 0.174 mmol). Purified by column chromatography (silica gel, 4:1 CH<sub>2</sub>Cl<sub>2</sub>/EtOAc).

Data for **4g**; colorless oil;  $R_f = 0.30$  (CH<sub>2</sub>Cl<sub>2</sub>/EtOAc = 3:1);  $[\alpha]_D^{25} -3.1^\circ$  ( $c = 1.0$ , CHCl<sub>3</sub>); IR (neat)  $\nu = 3320, 2964, 1730, 1531, 1215, 1961, 698$  cm<sup>-1</sup>; <sup>1</sup>H NMR (400 MHz, CDCl<sub>3</sub>)  $\delta$  7.37–7.30 (m, 5H), 6.91 (d,  $J = 7.6$  Hz, 1H), 5.81 (d,  $J = 7.2$  Hz, 1H), 5.16 (d,  $J = 12.0$  Hz, 1H), 5.11 (d,  $J = 12.0$  Hz, 1H), 4.54 (dd,  $J = 8.0, 4.4$  Hz, 1H), 4.29–4.25 (m, 1H), 4.11–4.06 (m, 1H), 3.74 (s, 3H), 3.69–3.62 (m, 1H), 3.14 (br, 1H), 1.94–1.86 (m, 1H), 1.43–1.34 (m, 1H), 1.20–1.09 (m, 1H), 0.92–0.84 (m, 6H); <sup>13</sup>C NMR (100 MHz, CDCl<sub>3</sub>)  $\delta$  172.3, 171.0, 156.5, 136.0, 128.5, 128.2, 128.0, 67.2, 62.8, 56.8, 55.2, 52.3, 37.3, 25.0, 15.5, 11.5; HRMS (ESI)  $m/z$  calcd. for C<sub>18</sub>H<sub>26</sub>N<sub>2</sub>NaO<sub>6</sub>[M+Na]<sup>+</sup> 389.1689, found 389.1676.

### Cbz-Ser-Tle-OMe (**4h**)

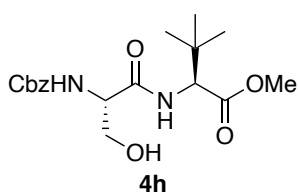

Compound **4h** was prepared according to the procedure A from Cbz-Ser-OMe (**2a**) (50.7 mg, 0.200 mmol) and H-Tle-OMe (**3h**) (87.1 mg, 0.600 mmol) at 80 °C for 24 h. Yield 98% (72.2 mg, 0.197 mmol). Purified by column chromatography (silica gel, 4:1 CH<sub>2</sub>Cl<sub>2</sub>/EtOAc).

Data for **4h**; white solid;  $R_f = 0.20$  (CH<sub>2</sub>Cl<sub>2</sub>/EtOAc = 4:1);  $[\alpha]_D^{25} -27.8^\circ$  ( $c = 1.0$ , CHCl<sub>3</sub>); IR (KBr)  $\nu = 3401, 3276, 2960, 2727, 1962, 1720, 1639, 1509, 1359, 1221, 1056, 759 \text{ cm}^{-1}$ ; mp 85–87 °C; <sup>1</sup>H NMR (270 MHz, CDCl<sub>3</sub>)  $\delta$  7.35–7.30 (m, 5H), 7.20 (d,  $J = 9.2$  Hz, 1H), 5.95 (d,  $J = 7.6$  Hz, 1H), 5.16 (d,  $J = 12.2$  Hz, 1H), 5.10 (d,  $J = 12.2$  Hz, 1H), 4.37 (d,  $J = 9.2$  Hz, 1H), 4.30–4.25 (m, 1H), 4.06 (dd,  $J = 11.6, 3.0$  Hz, 1H), 3.71 (s, 3H), 3.65 (dd,  $J = 11.6, 5.7$  Hz, 1H), 2.84 (br, 1H), 0.94 (s, 9H); <sup>13</sup>C NMR (126 MHz, CDCl<sub>3</sub>)  $\delta$  171.7, 170.9, 156.7, 136.0, 128.5, 128.2, 128.0, 67.3, 62.5, 60.5, 55.0, 51.9, 34.4, 26.5; HRMS (ESI)  $m/z$  calcd for C<sub>18</sub>H<sub>26</sub>N<sub>2</sub>NaO<sub>6</sub> [M+Na]<sup>+</sup> 389.1689, found 389.1686.

### Cbz-Ser-Phe-OMe (**4i**)<sup>3</sup>

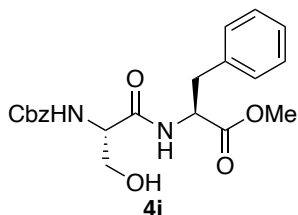

Compound **4i** was prepared according to the procedure A from Cbz-Ser-OMe (**2a**) (50.7 mg, 0.200 mmol) and H-Phe-OMe (**3i**) (108 mg, 0.600 mmol) at 80 °C for 24 h. Yield >99% (79.9 mg, 0.200 mmol). Purified by column chromatography (silica gel, 40:1 Et<sub>2</sub>O/MeOH).

Data for **4i**; colorless amorphous;  $R_f = 0.30$  (hexane/EtOAc = 2:3);  $[\alpha]_D^{25} +9.9^\circ$  ( $c = 1.0$ , CHCl<sub>3</sub>); IR (neat)  $\nu = 3271, 3017, 1743, 1552, 1447, 1179, 1028, 910, 771 \text{ cm}^{-1}$ ; <sup>1</sup>H NMR (500 MHz, CDCl<sub>3</sub>)  $\delta$  7.38–7.31 (m, 5H), 7.28–7.21 (m, 3H), 7.10–7.09 (m, 2H), 6.88 (d,  $J = 5.5$  Hz, 1H), 5.69 (d,  $J = 7.0$  Hz, 1H), 5.12 (d,  $J = 12.0$ , 1H), 5.08 (d,  $J = 12.0$  Hz, 1H), 4.85 (dt,  $J = 7.0, 5.5$  Hz, 1H), 4.22–4.19 (m, 1H), 4.02 (dd,  $J = 11.5, 2.5$  Hz, 1H), 3.74 (s, 3H), 3.59 (dd,  $J = 11.5, 5.5$  Hz, 1H), 3.17 (dd,  $J = 13.5, 7.0$  Hz, 1H), 3.03 (dd,  $J = 13.5, 7.0$  Hz, 1H), 2.34 (br, 1H); <sup>13</sup>C NMR (126 MHz, CDCl<sub>3</sub>)  $\delta$  171.8, 170.6, 156.4, 135.9, 135.5, 129.1, 128.7, 128.6, 128.3, 128.1, 127.3, 67.3, 62.8, 55.1, 53.3, 52.6, 37.6; HRMS (ESI)  $m/z$  calcd for C<sub>21</sub>H<sub>24</sub>N<sub>2</sub>NaO<sub>6</sub> [M+Na]<sup>+</sup> 423.1532, found 423.1521.





#### Cbz-Ser-Asn-O<sup>t</sup>Bu (**4m**)

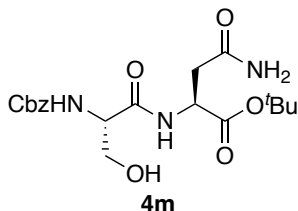

Compound **4m** was prepared according to the procedure A from Cbz-Ser-OMe (**2a**) (50.7 mg, 0.200 mmol) and H-Asn-O<sup>t</sup>Bu (**3m**) (113 mg, 0.600 mmol) at 80 °C for 48 h in toluene (0.2 M) in the absence of MS 4A (400 mg). Yield 91% (74.9 mg, 0.183 mmol). Purified by column chromatography (silica gel, 19:1 CH<sub>2</sub>Cl<sub>2</sub>/MeOH). Data for **4m**; yellow amorphous;  $R_f = 0.31$  (CH<sub>2</sub>Cl<sub>2</sub>/MeOH = 9:1);  $[\alpha]_D^{24} +12.8^\circ$  ( $c = 1.0$ , CHCl<sub>3</sub>); IR (neat)  $\nu = 3340, 2980, 1672, 1524, 1410, 1370, 1217, 1157, 1059, 845, 756 \text{ cm}^{-1}$ ; <sup>1</sup>H NMR (270 MHz, CDCl<sub>3</sub>)  $\delta$  7.82 (d,  $J = 7.0$  Hz, 1H), 7.33–7.28 (m, 5H), 6.40 (br, 2H), 5.09 (s, 2H), 4.67 (br, 1H), 4.32 (br, 1H), 3.95 (dd,  $J = 10.5, 2.4$  Hz, 1H), 3.79 (br, 1H), 3.69 (dd,  $J = 10.5, 3.2$  Hz, 1H), 2.76 (br, 1H), 1.42 (s, 9H); <sup>13</sup>C NMR (126 MHz, CDCl<sub>3</sub>)  $\delta$  173.0, 170.9, 170.0, 156.4, 136.2, 128.5, 128.1, 128.0, 82.8, 67.0, 63.0, 56.5, 50.0, 37.0, 27.8; HRMS (ESI)  $m/z$  calcd for C<sub>19</sub>H<sub>27</sub>N<sub>3</sub>NaO<sub>7</sub> [M+Na]<sup>+</sup> 432.1747, found 432.1746.

#### Cbz-Ser-Glu(<sup>t</sup>Bu)-O<sup>t</sup>Bu (**4n**)

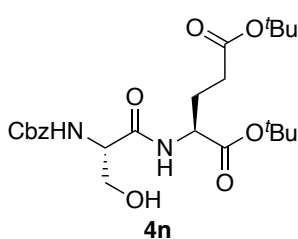

Compound **4n** was prepared according to the procedure A from Cbz-Ser-OMe (**2a**) (50.7 mg, 0.200 mmol) and H-Glu(<sup>t</sup>Bu)-O<sup>t</sup>Bu (**3n**) (156 mg, 0.600 mmol) at 80 °C for 24 h. Yield 90% (86.6 mg, 0.180 mmol). Purified by column chromatography (silica gel, 40:1 Et<sub>2</sub>O/MeOH). Data for **4n**; white solid;  $R_f = 0.21$  (hexane/EtOAc = 2:1);  $[\alpha]_D^{26} -19.1^\circ$  ( $c = 1.0$ , MeOH); IR (KBr)  $\nu = 3478, 3314, 2984, 2367, 1727, 1544, 1367, 1260, 1154, 1016, 848, 759 \text{ cm}^{-1}$ ; mp 96–97 °C; <sup>1</sup>H NMR (500 MHz, CDCl<sub>3</sub>)  $\delta$  7.35–7.29 (m, 5H), 7.13 (d,  $J = 8.0$  Hz, 1H), 5.84 (d,  $J = 7.0$  Hz, 1H), 5.12 (s, 2H), 4.46 (dt,  $J = 8.0, 4.5$  Hz, 1H), 4.30–4.27 (m, 1H), 4.04 (dd,  $J = 11.5, 3.0$  Hz, 1H), 3.66 (dd,  $J = 11.5, 6.5$  Hz, 1H), 2.61 (br, 1H), 2.34–2.23 (m, 2H), 2.17–2.10 (m, 1H), 1.95–1.87 (m, 1H), 1.46 (s, 9H), 1.43 (s, 9H); <sup>13</sup>C NMR (126 MHz, CDCl<sub>3</sub>)  $\delta$  172.3, 171.0, 170.7, 156.3, 136.1, 128.5, 128.2, 128.0, 82.8, 81.0, 67.2, 63.2, 55.7, 52.7, 31.5, 28.0, 27.9, 26.8; HRMS (ESI)  $m/z$  calcd for C<sub>24</sub>H<sub>36</sub>N<sub>2</sub>NaO<sub>8</sub> [M+Na]<sup>+</sup> 503.2369, found 503.2389.

#### Cbz-Ser-Trp-OMe (**4o**)<sup>4</sup>

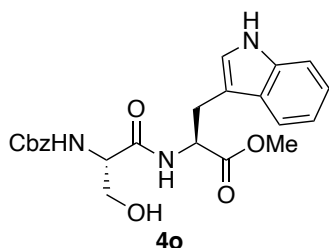

Compound **4o** was prepared according to the procedure A from Cbz-Ser-OMe (**2a**) (50.7 mg, 0.200 mmol) and H-Trp-OMe (**3o**) (131 mg, 0.600 mmol) at 80 °C for 24 h. Yield 75% (65.9 mg, 0.150 mmol). Purified by column chromatography (silica gel, 40:1 Et<sub>2</sub>O/MeOH). Data for **4o**; brown amorphous;  $R_f = 0.32$

(Et<sub>2</sub>O/MeOH = 40:1);  $[\alpha]_D^{24} +22.3^\circ$  ( $c = 1.0$ , CHCl<sub>3</sub>); IR (neat)  $\nu = 3629, 3317, 3016, 2953, 1713, 1670, 1525, 1457, 1342, 1217, 1060, 761 \text{ cm}^{-1}$ ; <sup>1</sup>H NMR (270 MHz, CDCl<sub>3</sub>)  $\delta$  8.46 (br, 1H), 7.48 (d,  $J = 7.6$  Hz, 1H), 7.33–7.24 (m, 6H), 7.20 (br, 1H), 7.16–7.04 (m, 2H), 6.91 (d,  $J = 1.9$  Hz, 1H), 5.98 (br, 1H), 5.04 (d,  $J = 12.4$  Hz, 1H), 4.99 (d,  $J = 12.4$  Hz, 1H), 4.87 (dt,  $J = 8.1, 5.4$  Hz, 1H), 4.28–4.22 (m, 1H), 3.84 (dd,  $J = 11.3, 3.2$  Hz, 1H), 3.63 (s, 3H), 3.56 (dd,  $J = 11.3, 5.7$  Hz, 1H), 3.27 (d,  $J = 5.4$  Hz, 2H), 3.07 (br, 1H); <sup>13</sup>C NMR (126 MHz, CDCl<sub>3</sub>)  $\delta$  172.3, 170.7, 156.4, 136.0, 128.5, 128.2, 128.1, 128.0, 127.2, 123.3, 122.0, 119.4, 118.2, 111.4, 109.1, 67.1, 62.7, 55.7, 52.9, 52.5, 27.1; HRMS (ESI)  $m/z$  calcd for C<sub>23</sub>H<sub>25</sub>N<sub>3</sub>NaO<sub>6</sub> [M+Na]<sup>+</sup> 462.1641, found 462.1653.

#### Cbz-Ser-His(Trt)-OMe (**4p**)

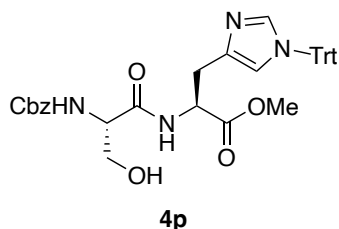

Compound **4p** was prepared according to the procedure B from Cbz-Ser-OMe (**2a**) (50.7 mg, 0.200 mmol) and H-His(Trt)-OMe (**3p**) (247 mg, 0.600 mmol) at 80 °C for 24 h. Yield 70% (88.0 mg, 0.139 mmol). Purified by column chromatography (silica gel, 30:1 Et<sub>2</sub>O/MeOH). Data for **4p**; yellow amorphous;  $R_f = 0.27$

(Et<sub>2</sub>O/MeOH = 30:1);  $[\alpha]_D^{25} +8.3^\circ$  ( $c = 1.0$ , CHCl<sub>3</sub>); IR (neat)  $\nu = 3414, 3015, 2952, 1724, 1672, 1495, 1445, 1333, 1216, 1133, 1059, 760 \text{ cm}^{-1}$ ; <sup>1</sup>H NMR (500 MHz, CDCl<sub>3</sub>)  $\delta$  7.45–7.29 (m, 16H), 7.10–7.05 (m, 6H), 6.53 (s, 1H), 6.14 (br, 1H), 5.14 (d,  $J = 12.5$  Hz, 1H), 5.11 (d,  $J = 12.5$  Hz, 1H), 4.81–4.78 (m, 1H), 4.24 (br, 1H), 4.13 (br d,  $J = 11.5$  Hz, 1H), 3.71 (dd,  $J = 11.5, 4.5$  Hz, 1H), 3.58 (s, 3H), 3.31 (dd,  $J = 15.0, 2.5$  Hz, 1H), 2.90 (dd,  $J = 15.0, 5.0$  Hz, 1H); <sup>13</sup>C NMR (126 MHz, CDCl<sub>3</sub>)  $\delta$  171.2, 170.8, 156.0, 141.7, 138.4, 136.2, 129.7, 128.5, 128.3, 128.2, 128.1, 128.0, 127.9, 120.0, 67.0, 63.1, 57.4, 53.2, 52.4, 28.7; HRMS (ESI)  $m/z$  calcd for C<sub>37</sub>H<sub>37</sub>N<sub>4</sub>O<sub>6</sub> [M+H]<sup>+</sup> 633.2713, found 633.2720.

#### Cbz-Ser-Lys(Boc)-OMe (**4q**)<sup>5</sup>

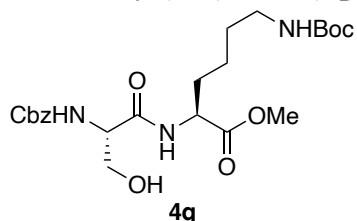

Compound **4q** was prepared according to the procedure B from Cbz-Ser-OMe (**2a**) (50.7 mg, 0.200 mmol) and H-Lys(Boc)-OMe (**3q**) (156 mg, 0.600 mmol) at 80 °C for 48 h. Yield 92% (88.7 mg, 0.184 mmol). Purified by column chromatography

(silica gel, 1:1 CH<sub>2</sub>Cl<sub>2</sub>/EtOAc). Data for **4q**; white solid;  $R_f = 0.26$  (CH<sub>2</sub>Cl<sub>2</sub>/EtOAc = 1:1);  $[\alpha]_D^{26} -10.9^\circ$  ( $c = 1.0$ , MeOH); IR (KBr)  $\nu = 3469, 3335, 2956, 2371, 1687, 1526, 1365, 1254, 1174, 1065, 869, 746, 697, 613 \text{ cm}^{-1}$ ; mp 104–105 °C; <sup>1</sup>H NMR (270 MHz, CDCl<sub>3</sub>)  $\delta$  7.35–7.28 (m, 5H), 7.25–7.22 (m, 1H), 6.02 (d,  $J = 7.8$  Hz, 1H), 5.11 (s, 2H), 4.79 (br, 1H), 4.59–4.52 (m, 1H), 4.35–4.29 (m, 1H), 4.03 (dd,  $J = 10.5, 2.4$  Hz, 1H), 3.71–3.65 (m, 4H), 3.25 (br, 1H), 3.04 (br, 1H), 1.90–1.78 (m, 1H), 1.72–1.59 (m, 1H), 1.50–1.17 (m, 14H); <sup>13</sup>C NMR (126 MHz, CDCl<sub>3</sub>)  $\delta$  172.8, 170.9, 156.4, 156.2, 136.0, 128.5, 128.1, 128.0, 79.3, 67.1, 62.8, 55.7, 52.5, 52.1, 40.0, 31.2, 29.2, 28.3, 22.3; HRMS (ESI)  $m/z$  calcd for C<sub>23</sub>H<sub>35</sub>N<sub>3</sub>NaO<sub>8</sub> [M+Na]<sup>+</sup> 504.2322, found 504.2315.

#### Cbz-Ser-Met-OMe (**4r**)<sup>6</sup>

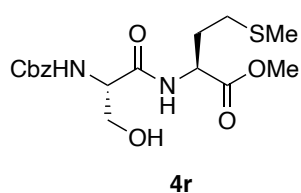

Compound **4r** was prepared according to the procedure A from Cbz-Ser-OMe (**2a**) (50.7 mg, 0.200 mmol) and H-Met-OMe (**3r**) (97.9 mg, 0.600 mmol) at 80 °C for 24 h. Yield 65% (49.7 mg, 0.129 mmol). Purified by column chromatography (silica gel, 4:1 CH<sub>2</sub>Cl<sub>2</sub>/EtOAc).

Data for **4r**; white solid;  $R_f = 0.32$  (CH<sub>2</sub>Cl<sub>2</sub>/EtOAc = 1:1);  $[\alpha]_D^{26} -21.7^\circ$  ( $c = 1.0$ , MeOH); IR (KBr)  $\nu = 3301, 3073, 2932, 2344, 1727, 1655, 1543, 1439, 1249, 1019, 698 \text{ cm}^{-1}$ ; <sup>1</sup>H NMR (500 MHz, CDCl<sub>3</sub>)  $\delta$  7.37–7.28 (m, 5H), 5.93 (d,  $J = 7.0$  Hz, 1H), 5.11 (s, 2H), 4.70 (dt,  $J = 8.0, 5.0$  Hz, 1H), 4.33–4.29 (m, 1H), 4.02 (dd,  $J = 11.5, 2.5$  Hz, 1H), 3.74 (s, 3H), 3.72–3.66 (m, 1H), 3.46 (br, 1H), 2.50 (br, 2H), 2.19–2.12 (m, 1H), 2.06 (s, 3H), 2.01–1.94 (m, 1H); <sup>13</sup>C NMR (126 MHz, CDCl<sub>3</sub>)  $\delta$  172.4, 170.9, 156.4, 135.9, 128.5, 128.2, 128.0, 67.2, 62.9, 55.5, 52.7, 51.7, 30.9, 29.9, 15.4; HRMS (ESI)  $m/z$  calcd for C<sub>17</sub>H<sub>24</sub>N<sub>2</sub>NaO<sub>6</sub>S [M+Na]<sup>+</sup> 407.1253, found 407.1250.

### Cbz-Thr-Val-OMe (**4s**)

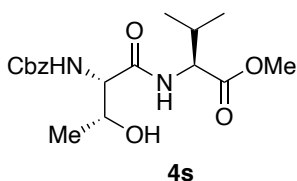

Compound **4s** was prepared according to the procedure A from Cbz-Thr-OMe (**2d**) (53.5 mg, 0.200 mmol) and H-Val-OMe (**3e**) (78.7 mg, 0.600 mmol) at 80 °C for 48 h. Yield 91% (66.9 mg, 0.183 mmol). Purified by column chromatography (silica gel, 4:1 CH<sub>2</sub>Cl<sub>2</sub>/EtOAc).

Data for **4s**; colorless oil;  $R_f = 0.34$  (CH<sub>2</sub>Cl<sub>2</sub>/EtOAc = 4:1);  $[\alpha]_D^{26} -29.4^\circ$  ( $c = 1.0$ , CHCl<sub>3</sub>); IR (neat)  $\nu = 3327, 2967, 1739, 1663, 1531, 1215, 1147, 1065, 740, 698$  cm<sup>-1</sup>; <sup>1</sup>H NMR (500 MHz, CDCl<sub>3</sub>)  $\delta$  7.37–7.29 (m, 5H), 7.07 (d,  $J = 9.0$  Hz, 1H), 5.87 (d,  $J = 7.5$  Hz, 1H), 5.15 (d,  $J = 12.0$  Hz, 1H), 5.09 (d,  $J = 12.0$  Hz, 1H), 4.48 (dd,  $J = 9.0, 5.5$  Hz, 1H), 4.34–4.30 (m, 1H), 4.20 (dd,  $J = 7.5, 2.5$  Hz, 1H), 3.73 (s, 3H), 2.63 (br, 1H), 2.20–2.13 (m, 1H), 1.18 (d,  $J = 7.0$  Hz, 1H, 3H), 0.89 (d,  $J = 6.5$  Hz, 1H, 3H), 0.86 (d,  $J = 6.5$  Hz, 1H, 3H); <sup>13</sup>C NMR (126 MHz, CDCl<sub>3</sub>)  $\delta$  172.1, 171.1, 156.9, 136.0, 128.5, 128.2, 128.0, 67.2, 66.8, 58.1, 57.3, 52.2, 30.7, 19.0, 17.9, 17.5; HRMS (ESI)  $m/z$  calcd for C<sub>18</sub>H<sub>26</sub>N<sub>2</sub>NaO<sub>6</sub> [M+Na]<sup>+</sup> 389.1689, found 389.1707.

## 6. Competition experiment (Scheme 4A)

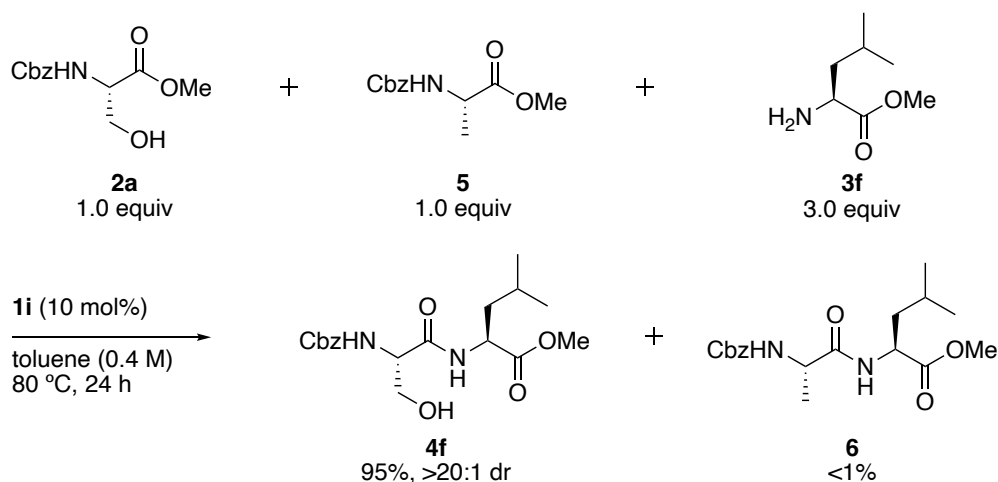

Boronic acid **1i** (5.38 mg, 20.0  $\mu\text{mol}$ , 10.0 mol%) was added to a solution of Cbz-Ser-OMe (**2a**) (50.7 mg, 0.200 mmol, 1.0 equiv), Cbz-Ala-OMe (**5**) (47.5 mg, 0.200 mmol, 1.0 equiv) and H-Leu-OMe (**3f**) (87.1 mg, 0.600 mmol, 3.0 equiv) in toluene (0.5 mL, 0.40 M) at room temperature. After stirring for 24 h at 80 °C, the reaction mixture was cooled to room temperature. The reaction mixture was quenched by 1 M HCl and the resulting mixture was extracted with  $\text{CH}_2\text{Cl}_2$ . The combined organic layer was successively washed with sat.  $\text{NaHCO}_3$  aq.,  $\text{H}_2\text{O}$ , brine, dried over  $\text{Na}_2\text{SO}_4$ , filtered, and concentrated in vacuo. Compound **6** was not detected by  $^1\text{H}$  NMR analysis of the crude product. The crude product was purified by silica gel column chromatography (eluent, 4:1  $\text{CH}_2\text{Cl}_2/\text{EtOAc}$ ) to give the corresponding peptide **4f** (69.5 mg, 0.190 mmol, 95%, >20:1 dr) as a colorless oil.

## 7. Detection of presumed reaction intermediate (Scheme 4B)

ESI-MS analysis

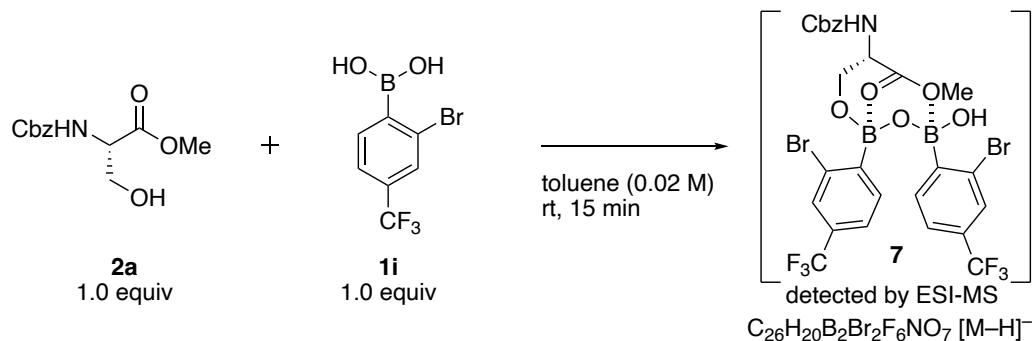

Boronic acid **1i** (2.69 mg, 10.0  $\mu$ mol, 1.0 equiv) was added to a solution of Cbz-Ser-OMe (**2a**) (2.53 mg, 10.0  $\mu$ mol, 1.0 equiv) in toluene (0.5 mL, 0.02 M) at room temperature. After stirring for 15 min at room temperature, ESI-MS (SI-Figure 1) was recorded using methanol as an eluent. The negative ESI-LRMS spectrum shown in SI-Figure 1 gave a peak corresponding to the expected intermediate **7**. The ESI-HRMS analysis showed  $m/z$  peak at 751.9701 ( $C_{26}H_{20}^{11}B_2^{79}Br_2F_6NO_7$  [M-H]<sup>-</sup>, calcd  $m/z$  751.9697). Other peaks such as complex **SI-4** (**1i** : **2a** = 1 : 2) and dimer of boronic acid **SI-5** were also detected by the negative ESI-MS analysis.

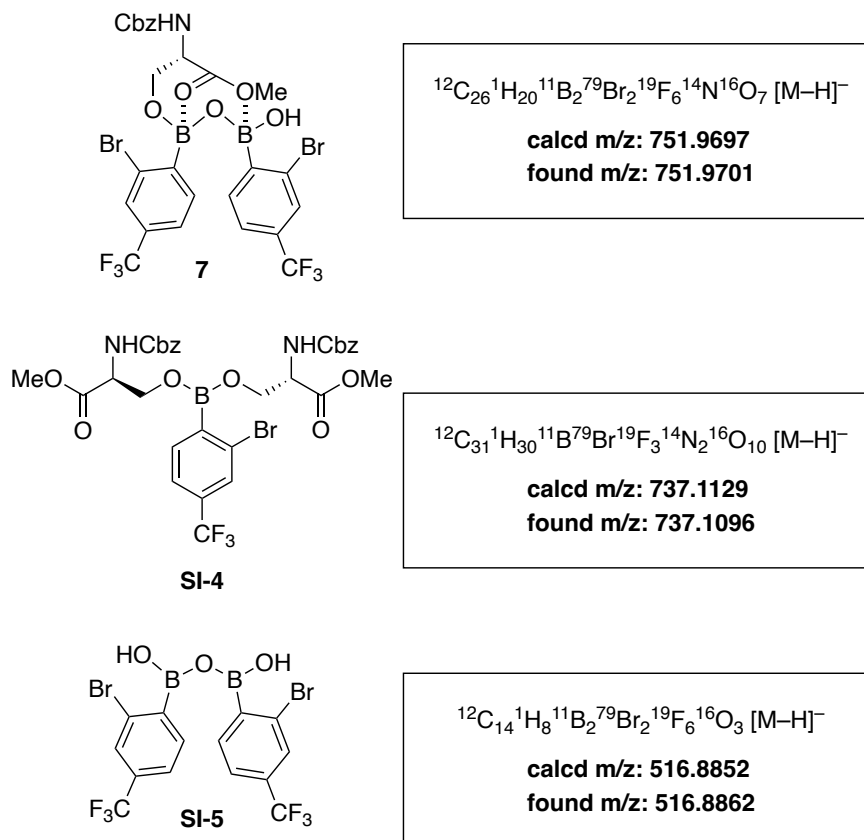

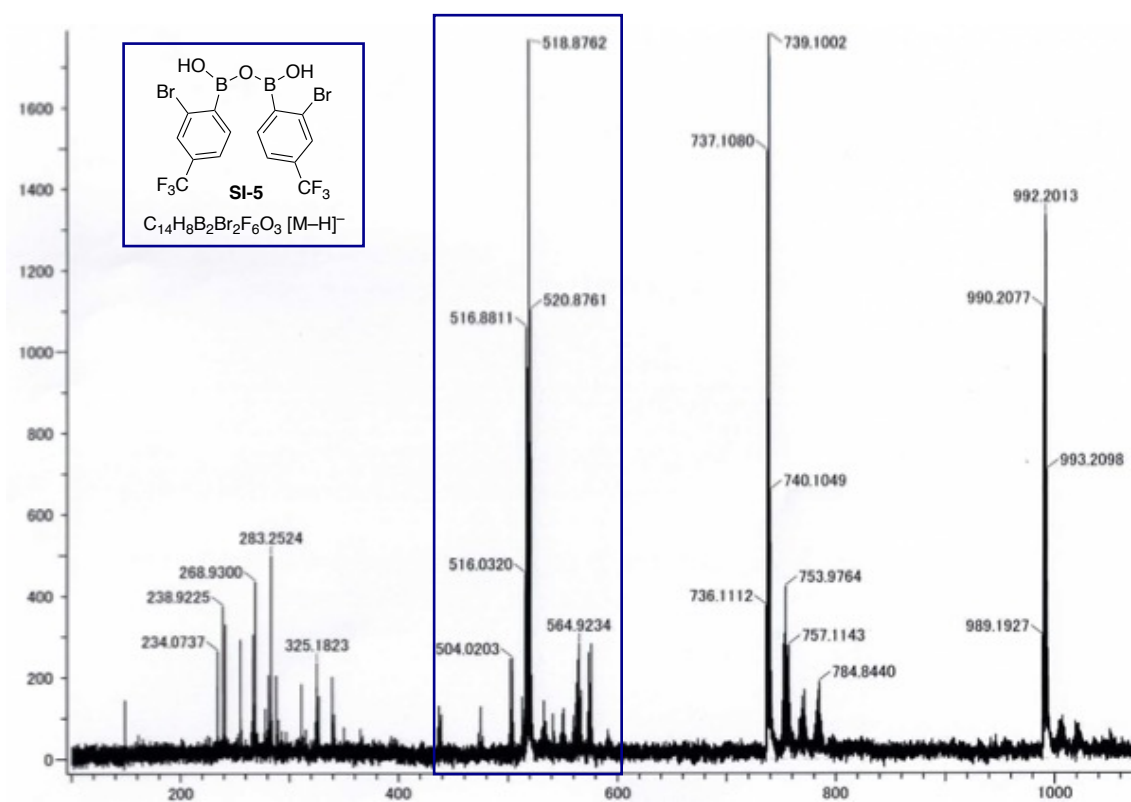

SI-Figure 1. Negative ESI-LRMS spectrum

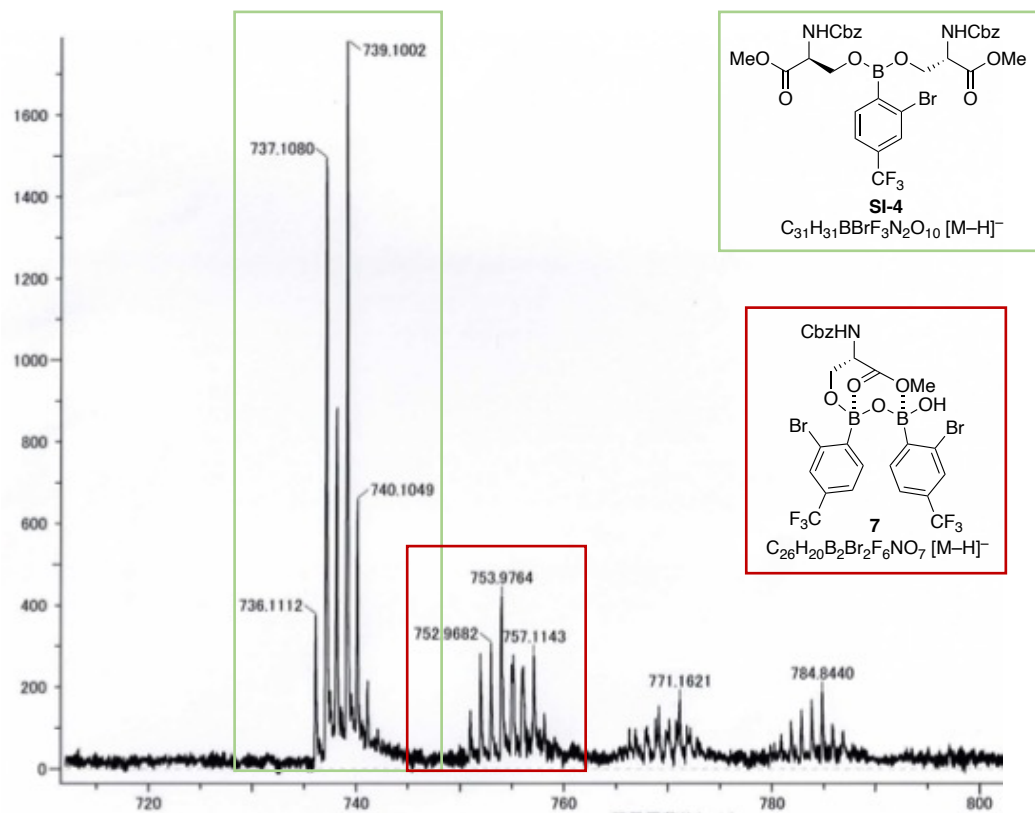

SI-Figure 2. Enlarged view of negative ESI-LRMS spectrum shown SI-Figure 1.

$^{11}\text{B}$  NMR analysis

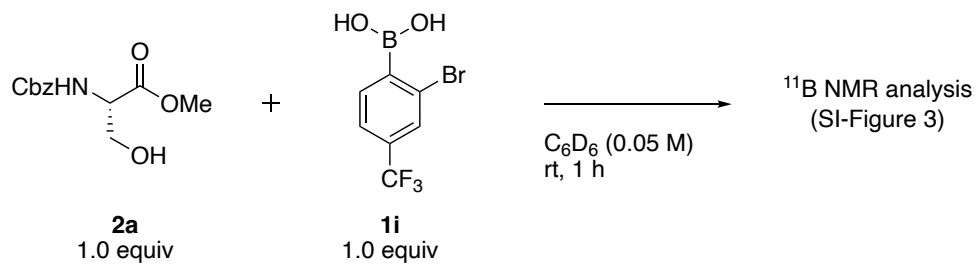

Boronic acid **1i** (5.38 mg, 20.0  $\mu\text{mol}$ , 1.0 equiv) was added to a solution of Cbz-Ser-OMe (**2a**) (5.07 mg, 20.0  $\mu\text{mol}$ , 1.0 equiv) in  $\text{C}_6\text{D}_6$  (0.5 mL, 0.05 M) at room temperature. After stirring for 1 h at room temperature,  $^{11}\text{B}$  NMR was recorded (SI-Figure 3).

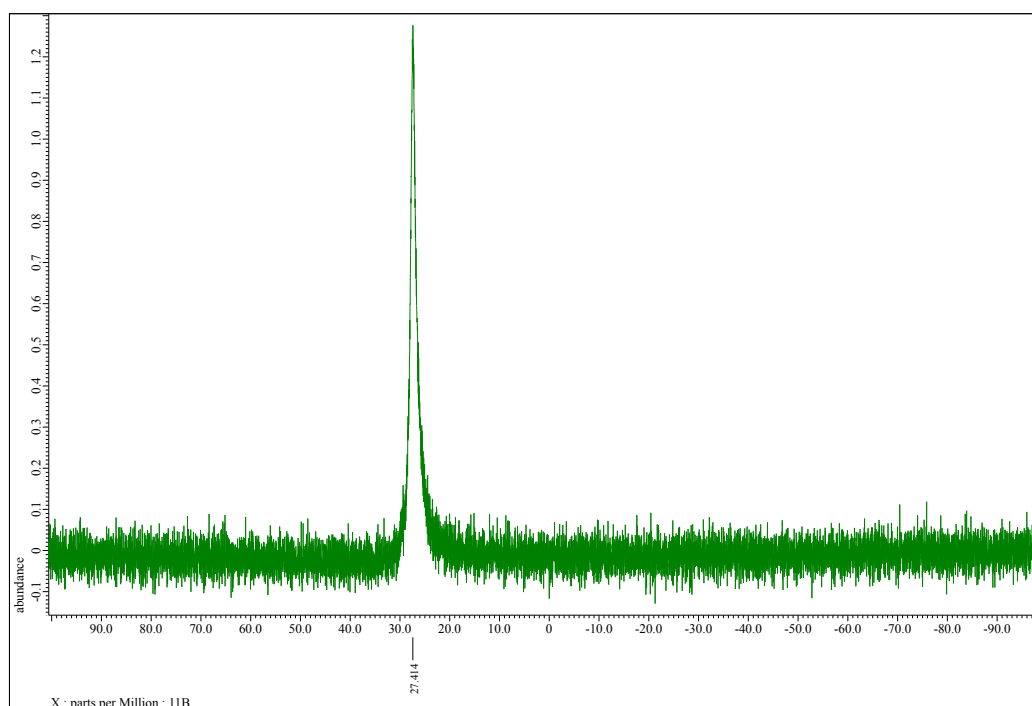

**SI-Figure 3.** The  $^{11}\text{B}$ -NMR spectrum of an equimolar mixture of Cbz-Ser-OMe (**2a**) and boronic acid **1i** in  $\text{C}_6\text{D}_6$ .

The  $^{11}\text{B}$ -NMR of a mixture of Cbz-Ser-OMe (**2a**) and boronic acid **1i** in  $\text{C}_6\text{D}_6$  suggested a tri-coordinated boron structure instead of the expected tetra-coordinated boron structure, probably due to the weak coordination of the ester functional group. (SI-Figure 3).



## 8. Application to the catalytic synthesis of oligopeptides (Scheme 4C)

### Cbz-Ser-Val-Ala-O<sup>t</sup>Bu (**9**)

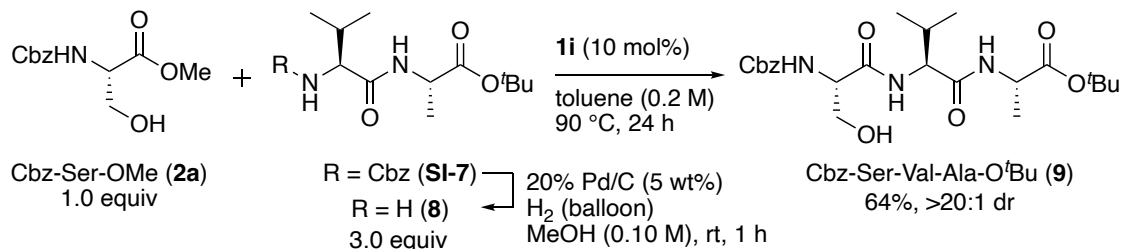

20% Pd/C (22.8 mg, 5 wt%) was added to a solution of Cbz-Val-Ala-O<sup>t</sup>Bu (**SI-7**) (114 mg, 0.300 mmol, 3.0 equiv) in MeOH (3.0 mL, 0.10 M) at room temperature and the atmosphere was filled with H<sub>2</sub> (1 atm, balloon). After stirred for 1 h, the resulting mixture was filtered through a pad of Celite® and the resulting filtrate was concentrated under reduced pressure to furnish the crude product, which was subjected to the next step without further purification.

Boronic acid **1i** (2.69 mg, 10.0 μmol, 10.0 mol%) was added to a solution of Cbz-Ser-OMe (**2a**) (25.3 mg, 0.100 mmol, 1.0 equiv) and H-Val-Ala-O<sup>t</sup>Bu (**8**) (73.3 mg, 0.300 mmol, 3.0 equiv) in toluene (0.5 mL, 0.20 M) at room temperature. After stirring for 24 h at 90 °C, the reaction mixture was cooled to room temperature. The reaction mixture was quenched by 1 M HCl and the resulting mixture was extracted with CH<sub>2</sub>Cl<sub>2</sub>. The combined organic layer was successively washed with sat. NaHCO<sub>3</sub> aq., H<sub>2</sub>O, brine, dried over Na<sub>2</sub>SO<sub>4</sub>, filtered, and concentration in vacuo. The crude material was purified by silica gel column chromatography (1:1 CH<sub>2</sub>Cl<sub>2</sub>/EtOAc) to give Cbz-Ser-Val-Ala-O<sup>t</sup>Bu (**9**) (30.0 mg, 0.064 mmol, 64%, >20:1 dr) as a white solid.

Data for **9**; white solid;  $R_f = 0.31$  (CH<sub>2</sub>Cl<sub>2</sub>/EtOAc = 1:1);  $[\alpha]_D^{26} -20.0^\circ$  ( $c = 1.0$ , CHCl<sub>3</sub>); IR (KBr)  $\nu = 3287, 2980, 2344, 1641, 1534, 1369, 1261, 1152, 1028, 695 \text{ cm}^{-1}$ ; mp 168–170 °C; <sup>1</sup>H NMR (500 MHz, CDCl<sub>3</sub>)  $\delta$  7.33–7.27 (m, 5H), 7.18 (d,  $J = 8.5 \text{ Hz}$ , 1H), 7.03 (d,  $J = 8.0 \text{ Hz}$ , 1H), 6.02 (d,  $J = 7.5 \text{ Hz}$ , 1H), 5.10 (s, 2H), 4.44–4.40 (m, 2H), 4.35–4.32 (m, 1H), 3.95 (dd,  $J = 11.0, 4.0 \text{ Hz}$ , 1H), 3.66 (dd,  $J = 11.0, 7.0 \text{ Hz}$ , 1H), 2.63 (br, 2H), 2.18–2.14 (m, 1H), 1.43 (s, 9H), 1.32 (d,  $J = 6.5 \text{ Hz}$ , 1H), 0.94 (d,  $J = 7.0 \text{ Hz}$ , 3H), 0.90 (d,  $J = 7.0 \text{ Hz}$ , 3H); <sup>13</sup>C NMR (126 MHz, CDCl<sub>3</sub>)  $\delta$  172.0, 171.2, 170.6, 156.3, 136.1, 128.5, 128.2, 128.0, 82.1, 67.0, 63.0, 59.0, 55.6, 48.8, 30.6, 27.9, 19.2, 18.2, 17.8; HRMS (ESI)  $m/z$  calcd for C<sub>23</sub>H<sub>35</sub>N<sub>3</sub>NaO<sub>7</sub> [M+Na]<sup>+</sup> 488.2373, found 488.2387.

### Cbz-Gly-Ser-Val-OMe (**11**)

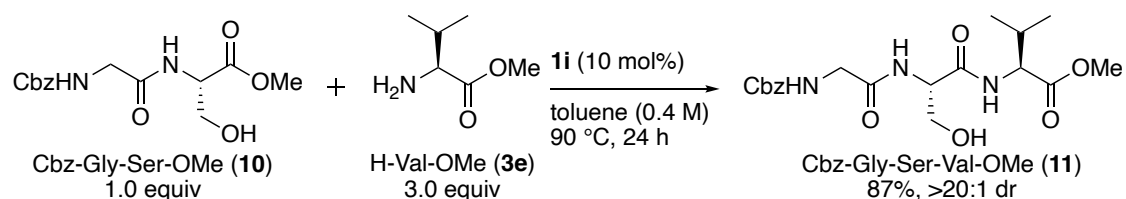

Boronic acid **1i** (5.38 mg, 20.0  $\mu$ mol, 10.0 mol%) was added to a solution of Cbz-Gly-Ser-OMe (**10**) (62.1 mg, 0.200 mmol, 1.0 equiv) and H-Val-OMe (**3e**) (78.7 mg, 0.600 mmol, 3.0 equiv) in toluene (0.5 mL, 0.40 M) at room temperature. After stirring for 24h at 90 °C, the reaction mixture was cooled to room temperature. The reaction mixture was quenched by 1 M HCl and the resulting mixture was extracted with CH<sub>2</sub>Cl<sub>2</sub>. The combined organic layer was successively washed with sat. NaHCO<sub>3</sub> aq., H<sub>2</sub>O, brine, dried over Na<sub>2</sub>SO<sub>4</sub>, filtered, and concentration in vacuo. The crude material was purified by silica gel column chromatography (20:1 Et<sub>2</sub>O/MeOH) to give Cbz-Gly-Ser-Val-OMe (**11**) (71.4 mg, 0.174 mmol, 87%, >20:1 dr) as a yellow oil.

Data for **11**; yellow oil;  $R_f$  = 0.23 (Et<sub>2</sub>O/MeOH = 20:1);  $[\alpha]_D^{26}$  -13.1° ( $c$  = 1.0, CHCl<sub>3</sub>); IR (neat)  $\nu$  = 3319, 3018, 2966, 1728, 1659, 1529, 1439, 1217, 1153, 1051, 999, 757 cm<sup>-1</sup>; <sup>1</sup>H NMR (270 MHz, CDCl<sub>3</sub>)  $\delta$  7.43 (br, 1H), 7.40 (br, 1H), 7.34–7.28 (m, 5H), 5.93–5.89 (m, 1H), 5.09 (s, 2H), 4.68–4.62 (m, 1H), 4.46 (dd,  $J$  = 8.1, 4.9 Hz, 1H), 3.97–3.90 (m, 3H), 3.75–3.64 (m, 4H), 3.43 (br, 1H), 2.22–2.10 (m, 1H), 0.91 (d,  $J$  = 6.8 Hz, 3H), 0.88 (d,  $J$  = 6.8 Hz, 3H); <sup>13</sup>C NMR (126 MHz, CDCl<sub>3</sub>)  $\delta$  172.3, 170.7, 170.0, 156.7, 136.1, 128.5, 128.2, 128.0, 67.1, 62.6, 55.6, 54.2, 52.3, 44.3, 30.6, 18.9, 17.7; HRMS (ESI)  $m/z$  calcd for C<sub>19</sub>H<sub>27</sub>N<sub>3</sub>NaO<sub>7</sub> [M+Na]<sup>+</sup> 432.1747, found 432.1751.

### Cbz-Gly-Ser-Val-Ala-O<sup>t</sup>Bu (**12**)

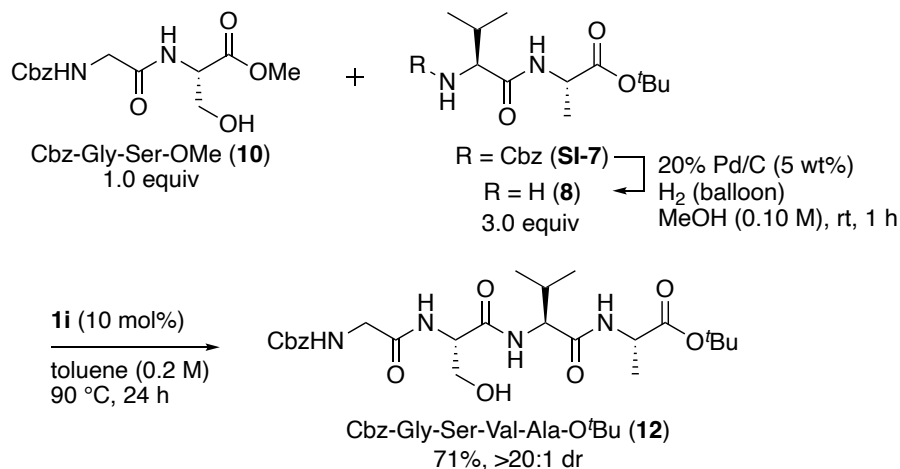

20% Pd/C (22.8 mg, 5 wt%) was added to a solution of Cbz-Val-Ala-O<sup>t</sup>Bu (**SI-7**) (114 mg, 0.300 mmol, 3.0 equiv) in MeOH (3.0 mL, 0.10 M) at room temperature and the atmosphere was filled with H<sub>2</sub> (1 atm, balloon). After stirred for 1 h, the resulting mixture was filtered through a pad of Celite® and the resulting filtrate was concentrated under reduced pressure to furnish the crude product, which was subjected to the next step without further purification.

Boronic acid **1i** (2.69 mg, 10.0 μmol, 10.0 mol%) was added to a solution of Cbz-Gly-Ser-OMe (**10**) (31.0 mg, 0.100 mmol, 1.0 equiv) and H-Val-Ala-O<sup>t</sup>Bu (**8**) (73.3 mg, 0.300 mmol, 3.0 equiv) in toluene (0.5 mL, 0.20 M) at room temperature. After stirring for 24 h at 90 °C, the reaction mixture was cooled to room temperature. The reaction mixture was quenched by 1 M HCl and the resulting mixture was extracted with CH<sub>2</sub>Cl<sub>2</sub>. The combined organic layer was successively washed with sat. NaHCO<sub>3</sub> aq., H<sub>2</sub>O, brine, dried over Na<sub>2</sub>SO<sub>4</sub>, filtered, and concentration in vacuo. The crude material was purified by silica gel column chromatography (1:9 CH<sub>2</sub>Cl<sub>2</sub>/EtOAc) to give Cbz-Gly-Ser-Val-Ala-O<sup>t</sup>Bu (**12**) (37.0 mg, 0.071 mmol, 71%, >20:1 dr) as a white solid.

Data for **12**; white solid;  $R_f = 0.30$  (CH<sub>2</sub>Cl<sub>2</sub>/EtOAc = 1:9);  $[\alpha]_D^{26} -16.1^\circ$  ( $c = 1.0$ , CHCl<sub>3</sub>); IR (KBr)  $\nu = 3266, 3088, 2963, 2371, 1735, 1620, 1560, 1455, 1367, 1235, 1159, 1056, 937, 752, 696, 590$  cm<sup>-1</sup>; mp 168–171 °C; <sup>1</sup>H NMR (270 MHz, CDCl<sub>3</sub>)  $\delta$  7.37–7.31 (m, 5H), 7.13 (br, 1H), 6.82–6.80 (m, 2H), 5.49 (br, 1H), 5.12 (s, 2H), 4.60–4.56 (m, 1H), 4.43 (dt,  $J = 7.8, 4.1$  Hz, 1H), 4.34–4.31 (m, 1H), 4.01 (br d,  $J = 4.6$  Hz, 1H), 3.95 (d,  $J = 2.7$  Hz, 2H), 3.62 (dd,  $J = 5.4, 3.8$  Hz, 1H), 2.28–2.21 (m, 1H), 1.45 (s, 9H), 1.35 (d,  $J = 3.8$  Hz, 3H), 0.98 (d,  $J = 3.5$  Hz, 3H), 0.93 (d,  $J = 3.5$  Hz, 3H); <sup>13</sup>C NMR (126 MHz, CDCl<sub>3</sub>)  $\delta$  172.0, 170.9, 170.8, 169.4, 156.7,

136.2, 129.5, 128.5, 128.2, 128.0, 82.0, 67.1, 63.1, 59.0, 54.5, 48.9, 44.3, 30.9, 27.9, 19.2, 18.0;  
HRMS (ESI) m/z calcd for  $C_{25}H_{38}N_4NaO_8 [M+Na]^+$  545.2587, found 545.2595.

## 9. References

- (1) M. Koshizuka, K. Makino and N. Shimada, *Org. Lett.*, 2020, **22**, 8658–8664.
- (2) M. Cortes-Clerget, J.-Y. Berthon, I. Krolikiewicz-Renimel, L. Chaisemartin and B. H. Lipshutz, *Green Chem.*, 2017, **19**, 4263–4267.
- (3) D. Ranganathan and S. Saini, *J. Am. Chem. Soc.*, 1991, **113**, 1042–1044.
- (4) G. L. Tolnai, J. P. Brand and J. Waser, *Beilstein J. Org. Chem.*, 2016, **12**, 745–749.
- (5) A. A. Costopanagiotis, B. O. Handford and B. Weinstein, *J. Org. Chem.*, 1968, **33**, 1261–1264.
- (6) D. Ranganathan, N. K. Vaish and K. Shah, *J. Am. Chem. Soc.*, 1994, **116**, 6545–6557.

10. <sup>1</sup>H and <sup>13</sup>C NMR spectra

<sup>1</sup>H NMR spectrum of 4a (270 MHz, CDCl<sub>3</sub>)

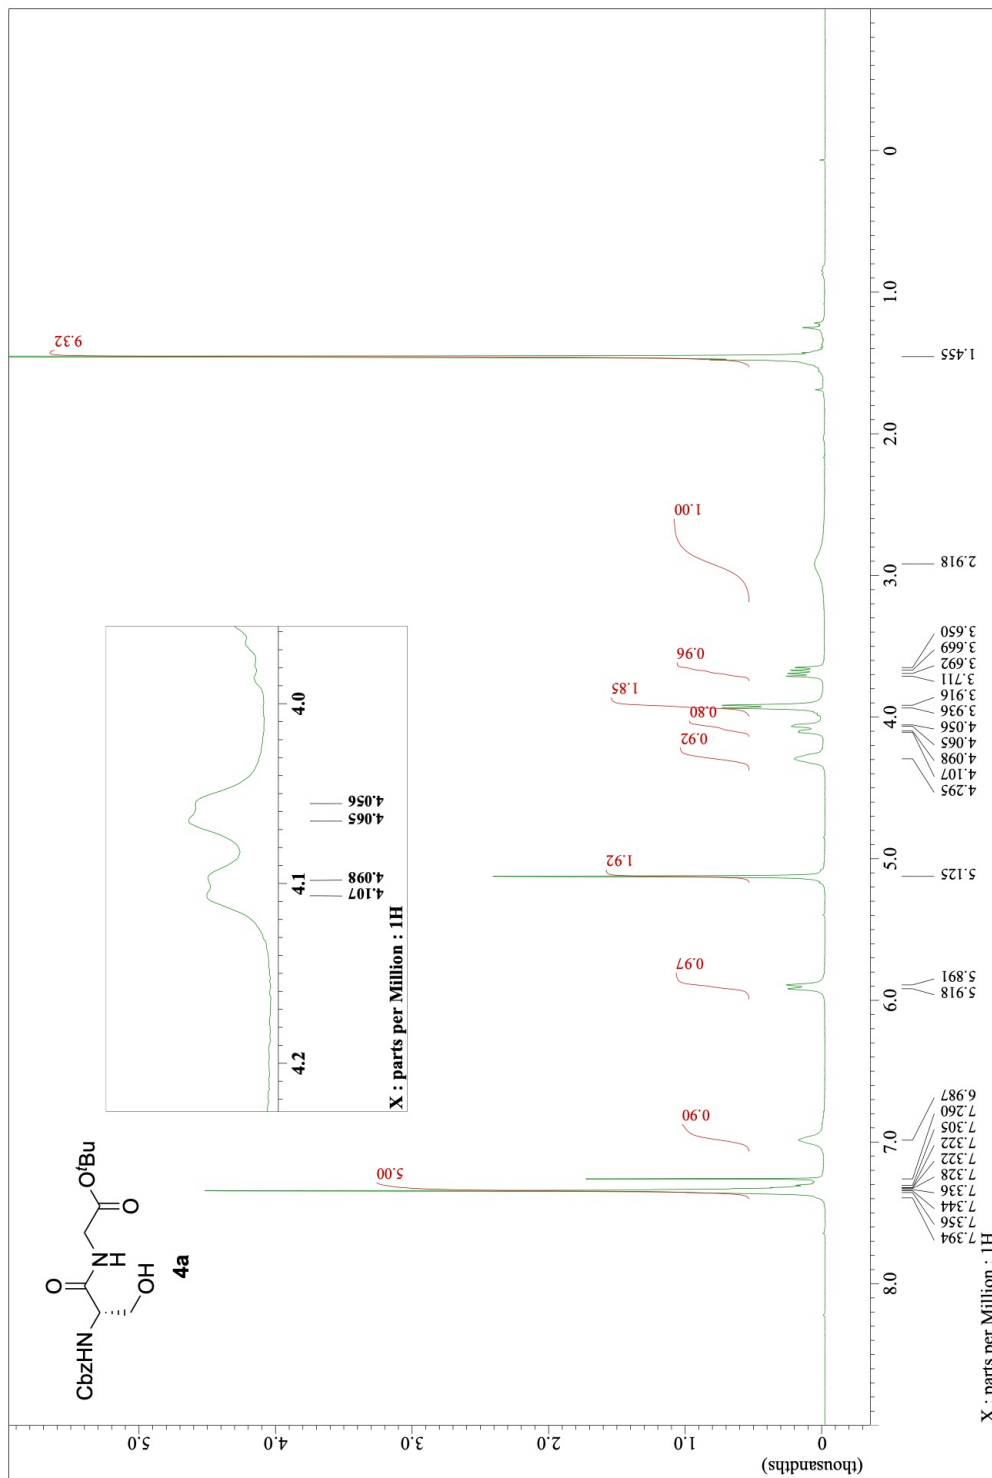

**$^{13}\text{C}$  NMR spectrum of 4a (126 MHz,  $\text{CDCl}_3$ )**

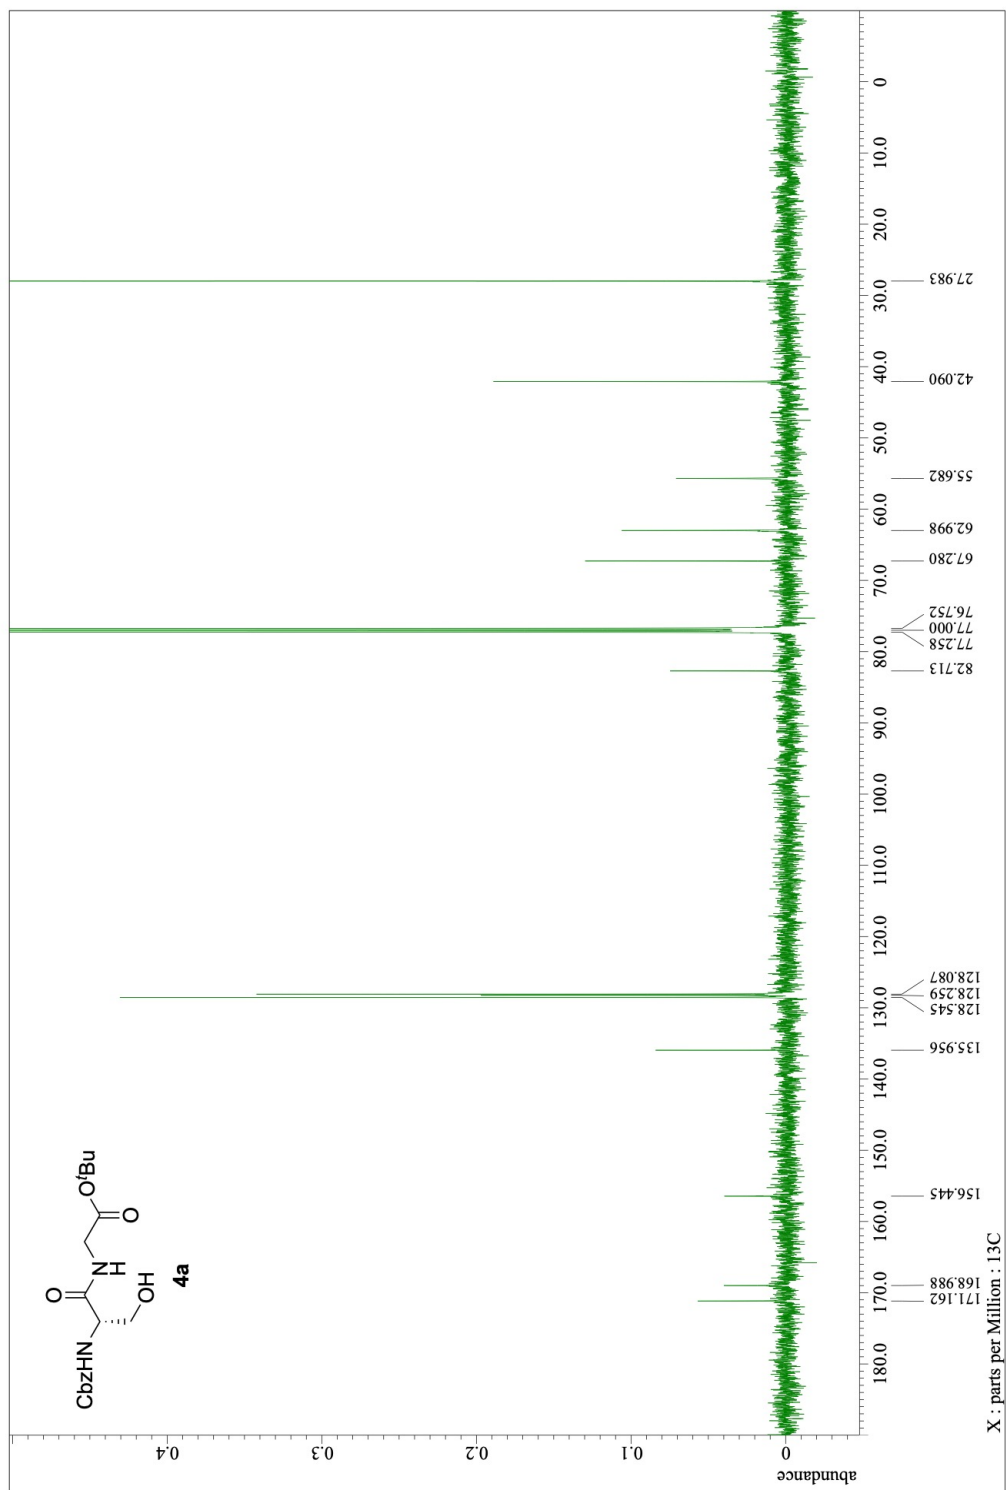

# <sup>1</sup>H NMR spectrum of 4b (500 MHz, CDCl<sub>3</sub>)

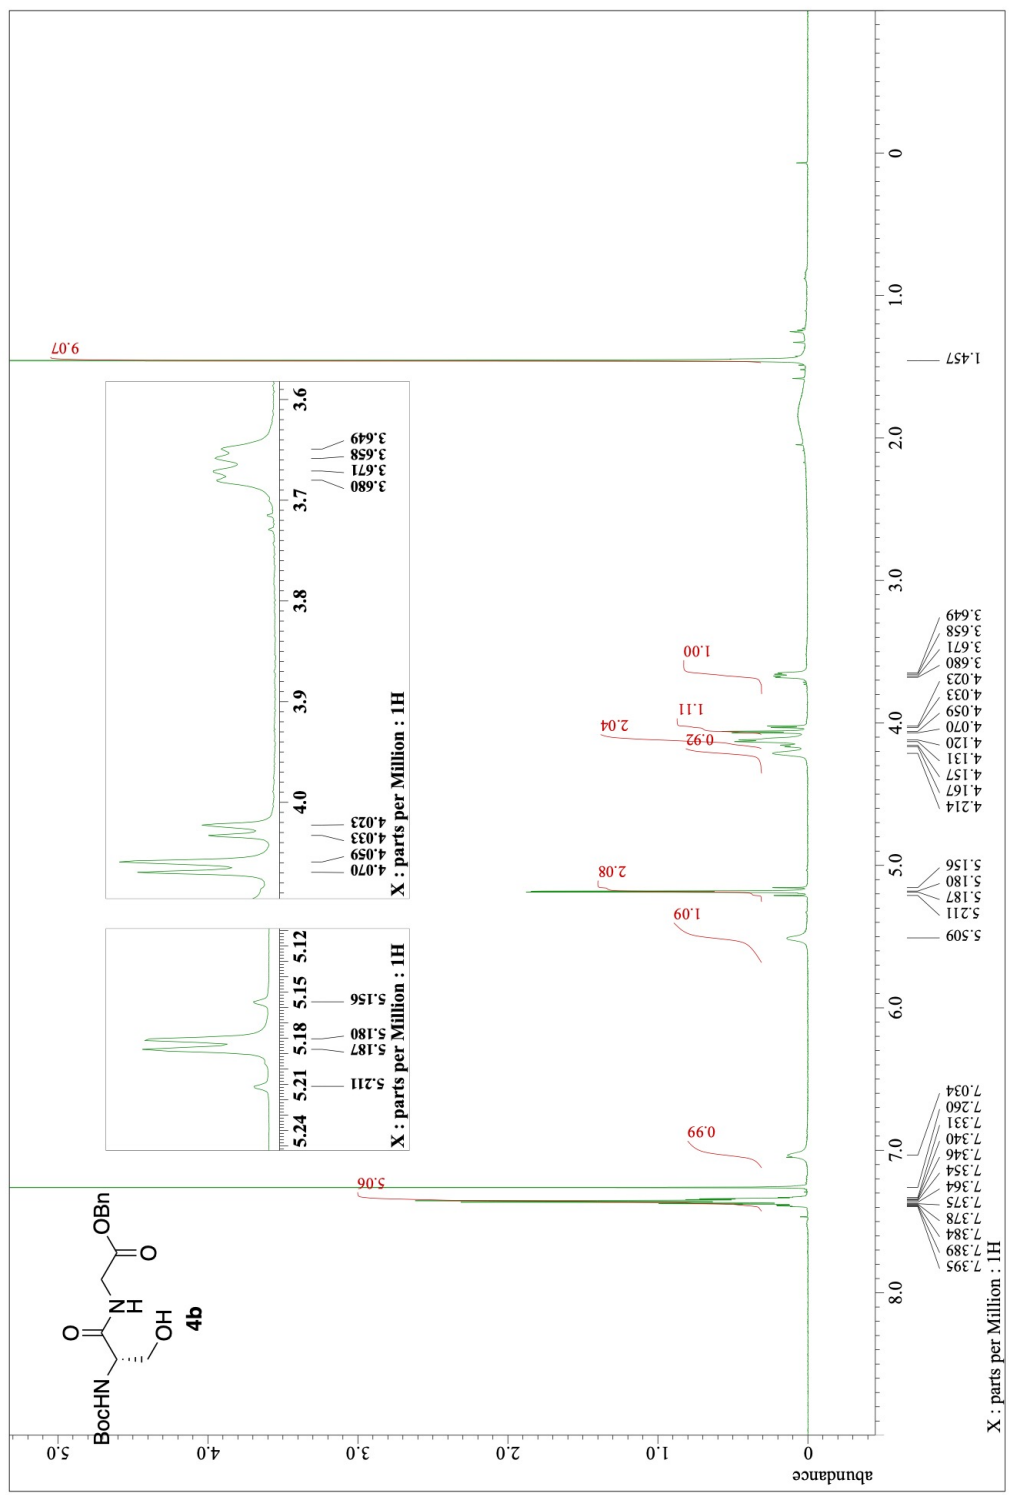



**$^{13}\text{C}$  NMR spectrum of 4b (100 MHz,  $\text{CDCl}_3$ )**

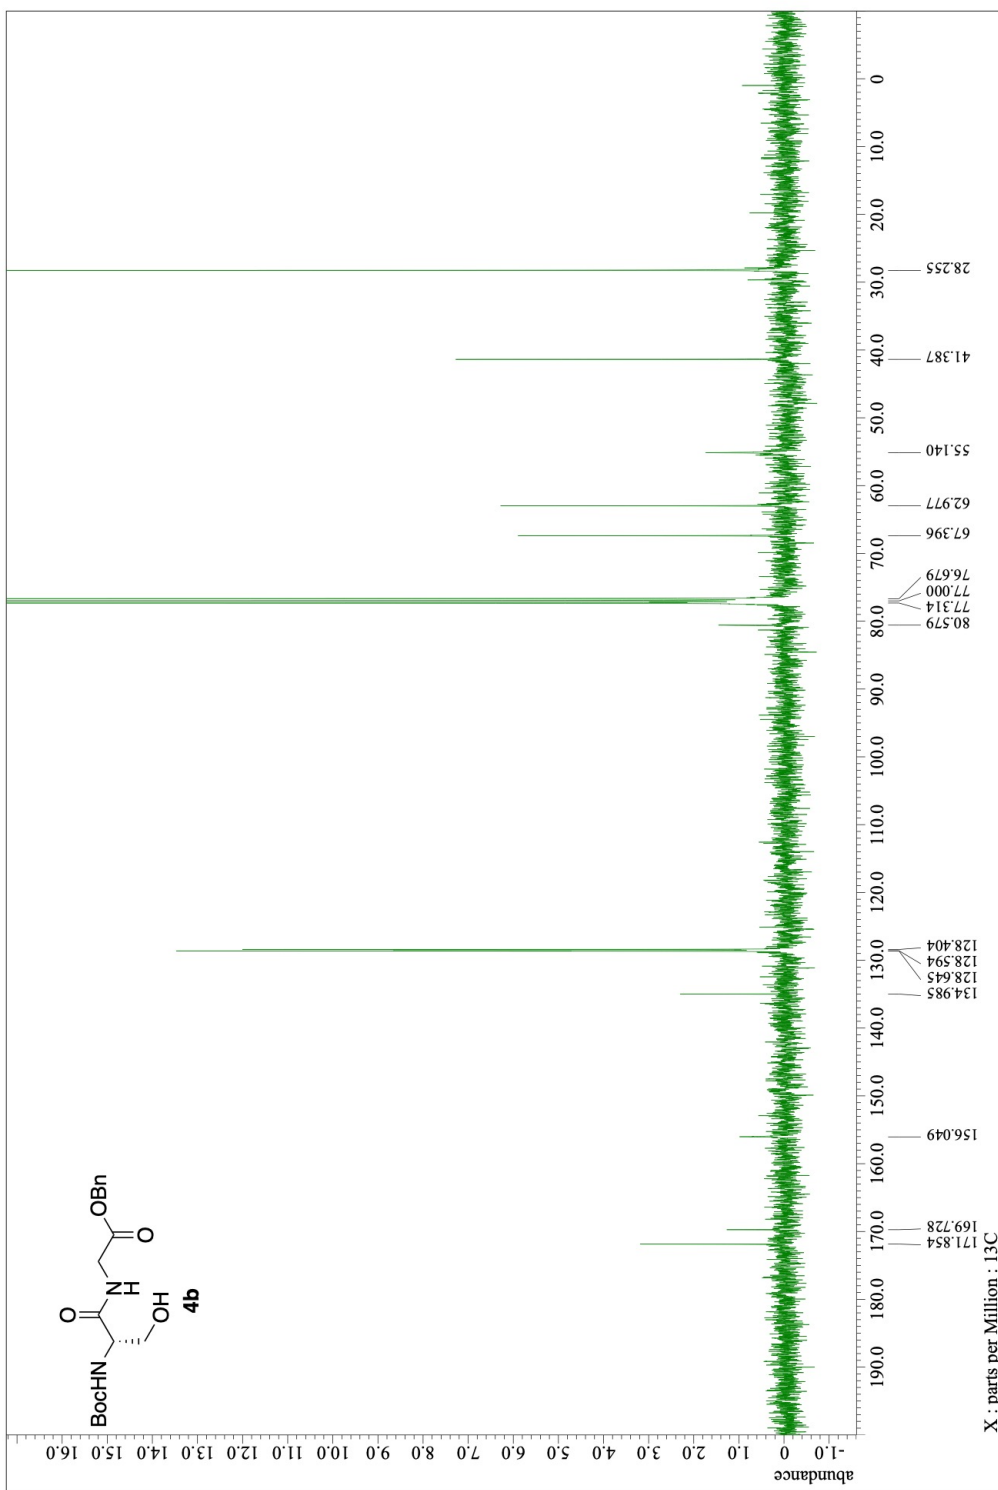

**<sup>1</sup>H NMR spectrum of 4c (270 MHz, CDCl<sub>3</sub>)**

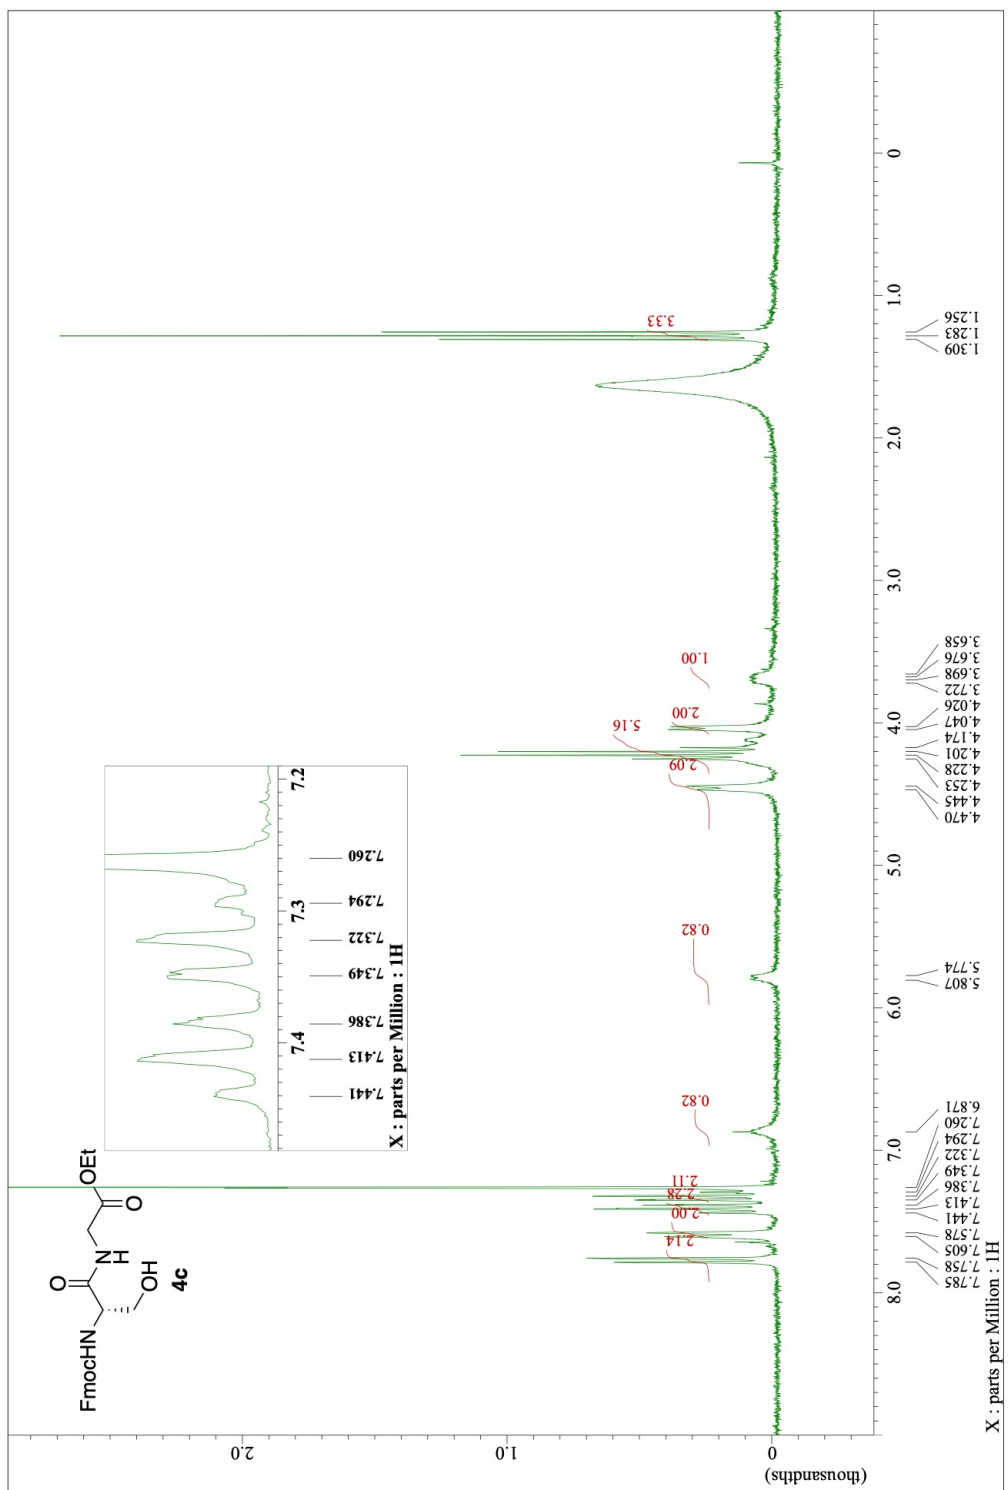

**<sup>13</sup>C NMR spectrum of 4c (126 MHz, CDCl<sub>3</sub>)**

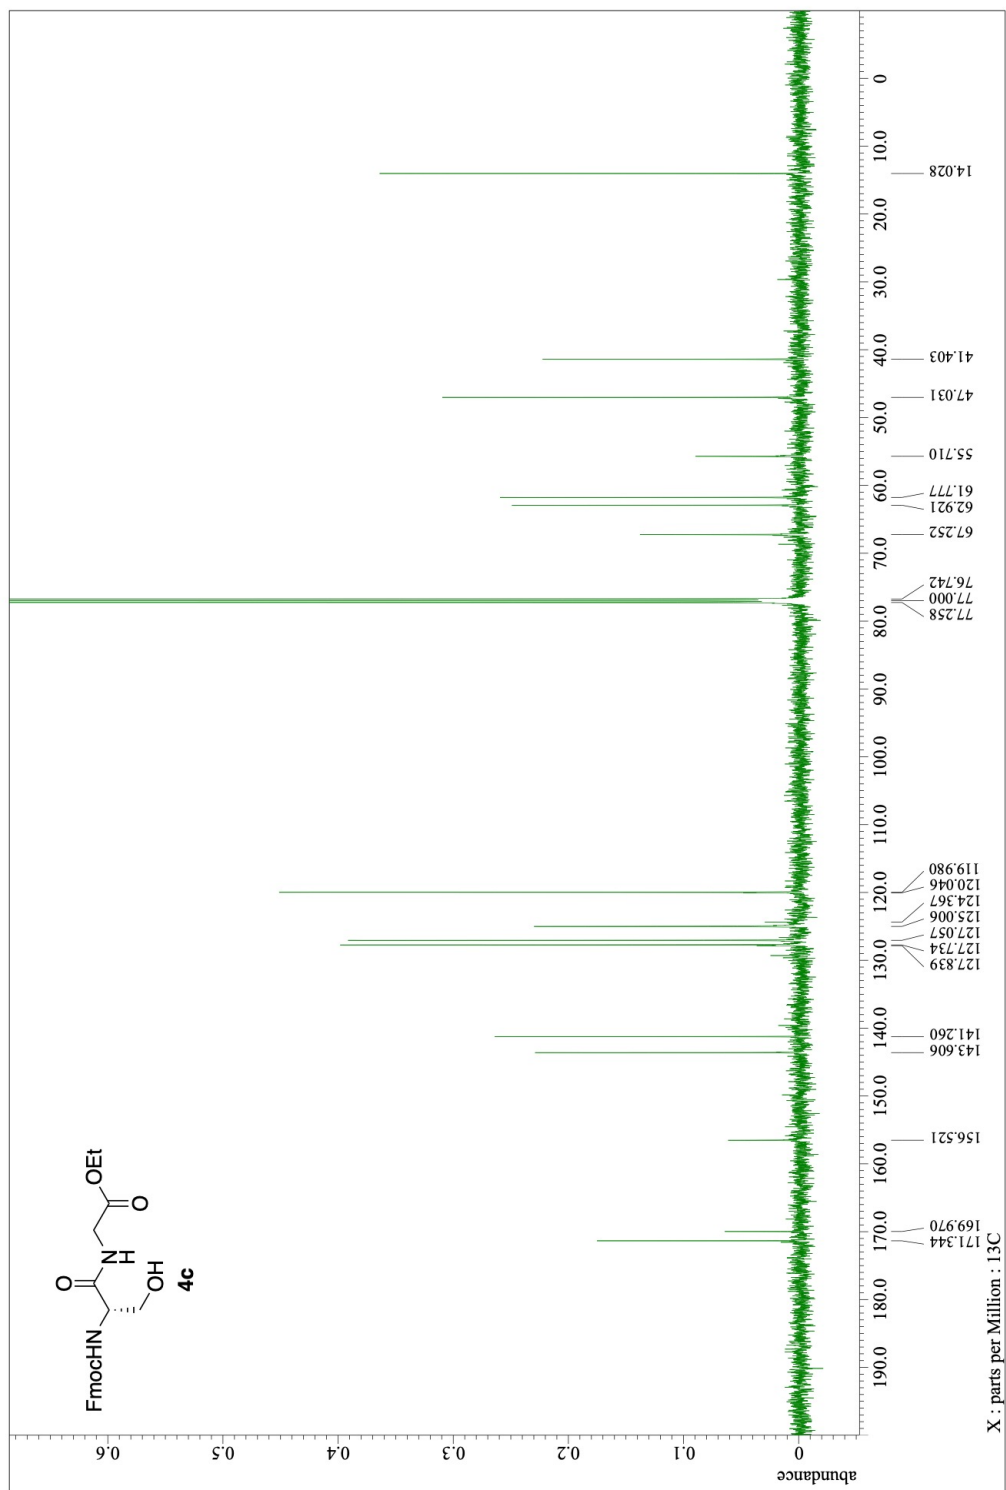

# <sup>1</sup>H NMR spectrum of 4d (500 MHz, CDCl<sub>3</sub>)

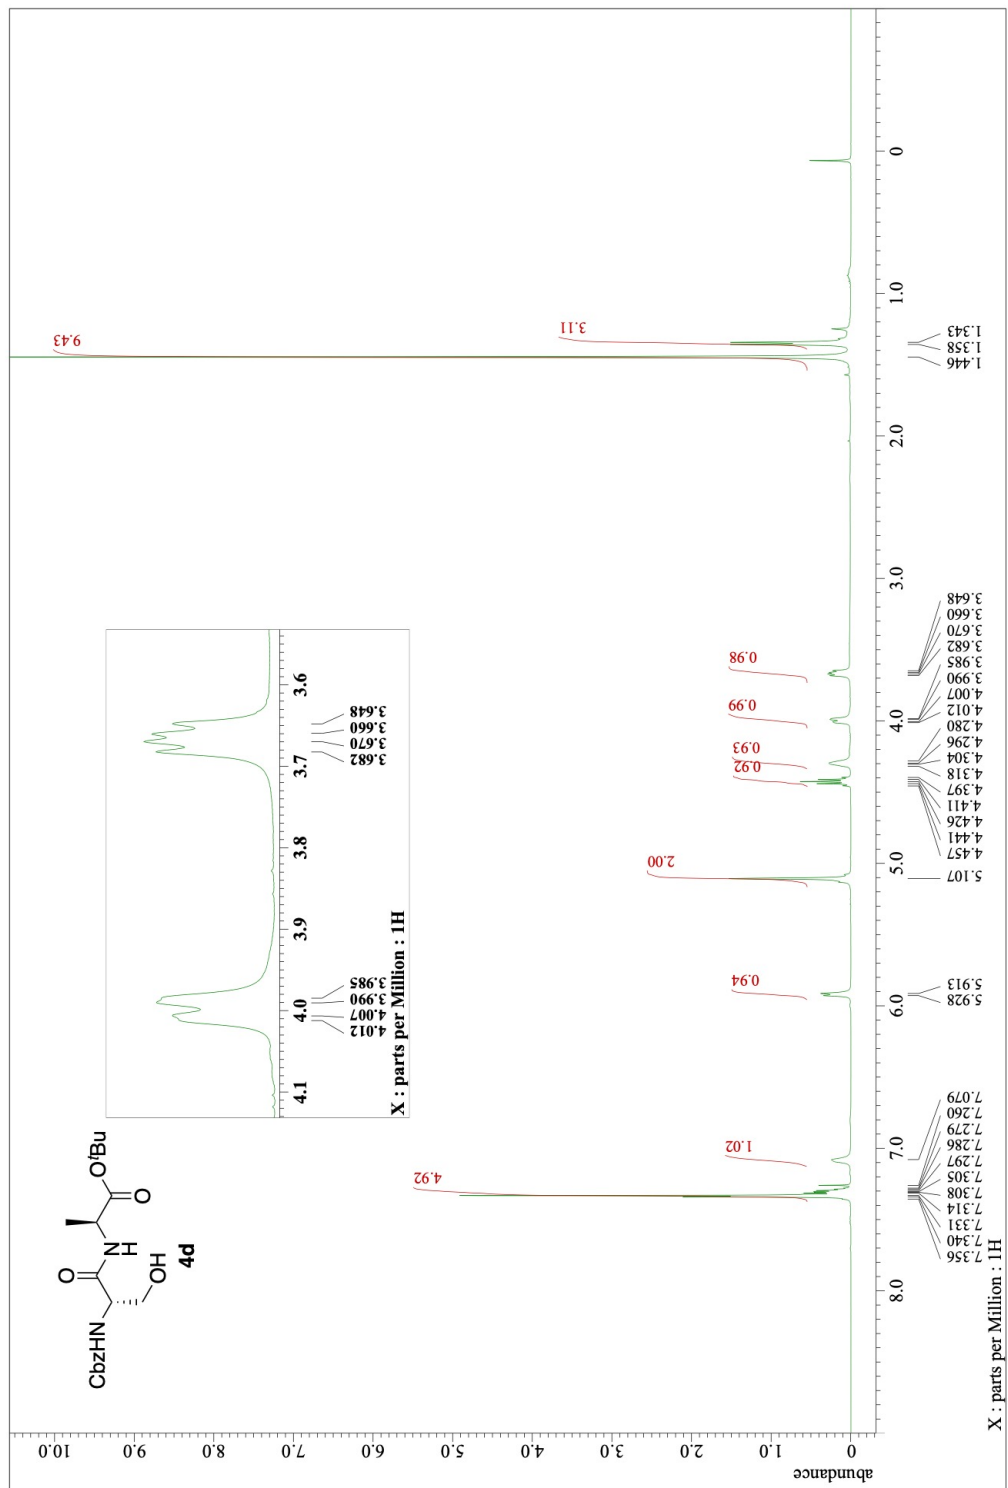

**$^{13}\text{C}$  NMR spectrum of 4d (126 MHz,  $\text{CDCl}_3$ )**

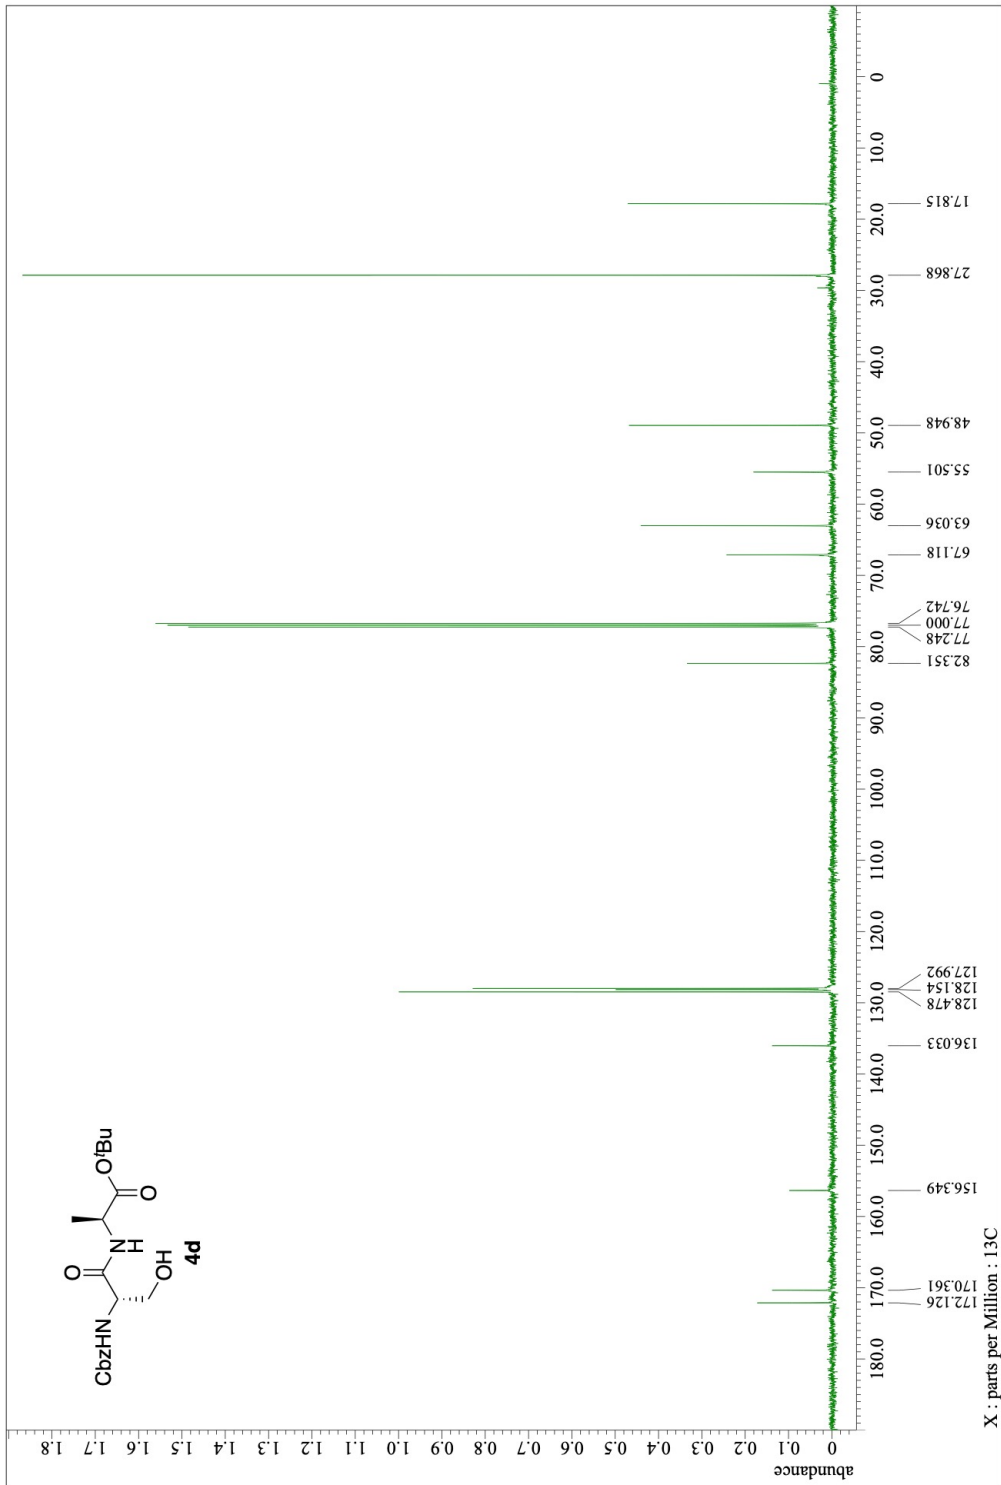

**$^1\text{H}$  NMR spectrum of 4e (500 MHz,  $\text{CDCl}_3$ )**

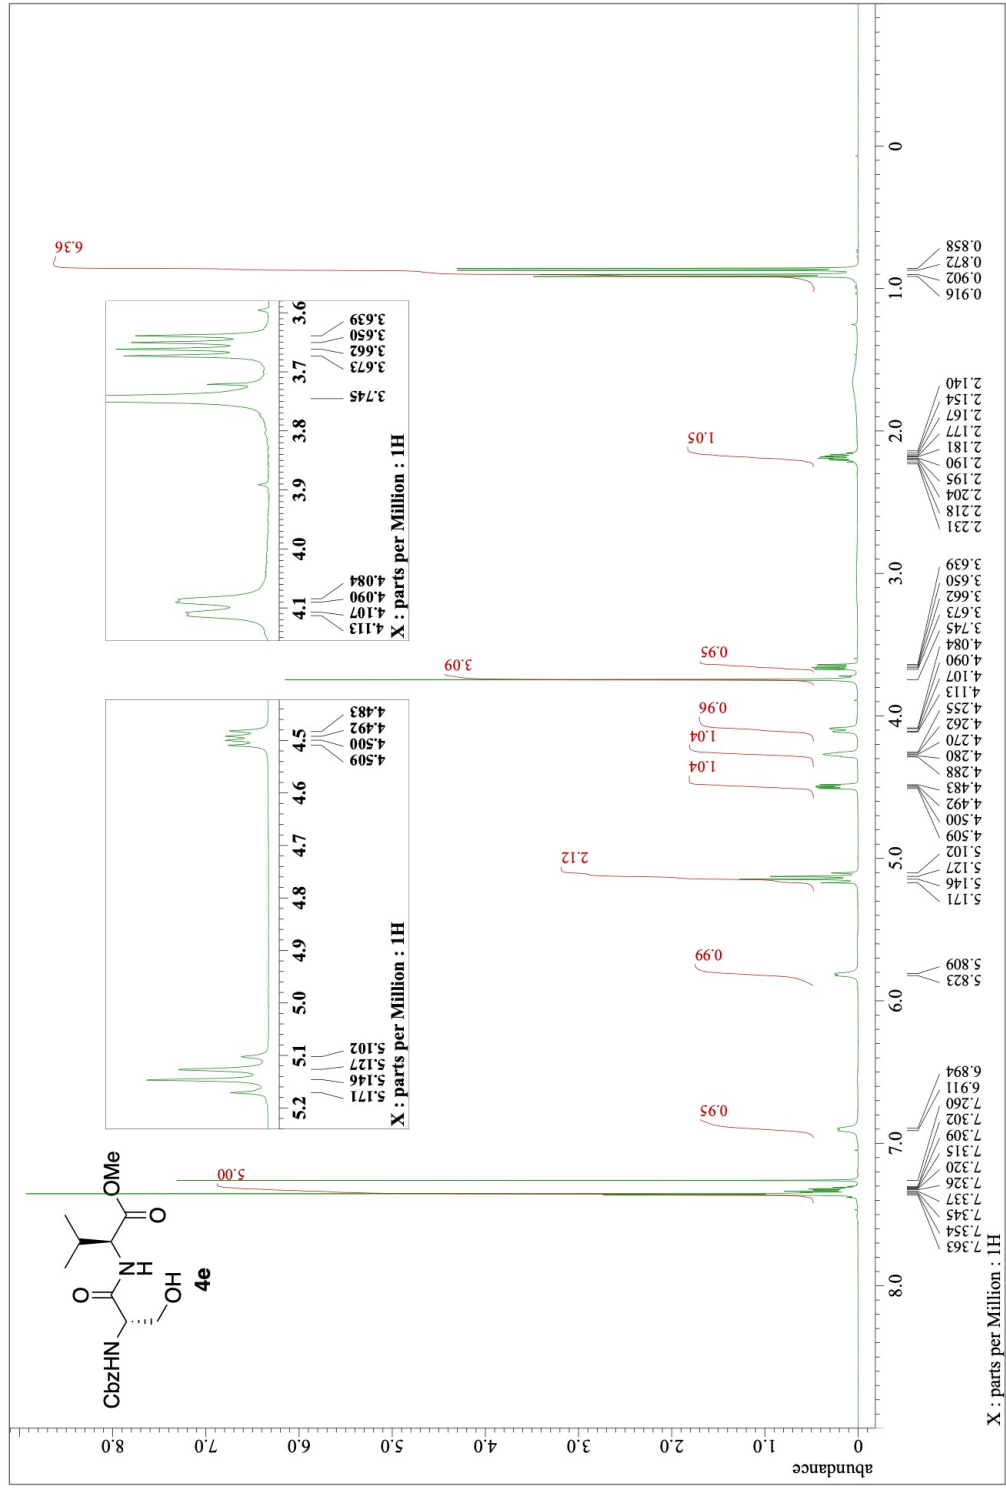

**<sup>13</sup>C NMR spectrum of 4e (126 MHz, CDCl<sub>3</sub>)**

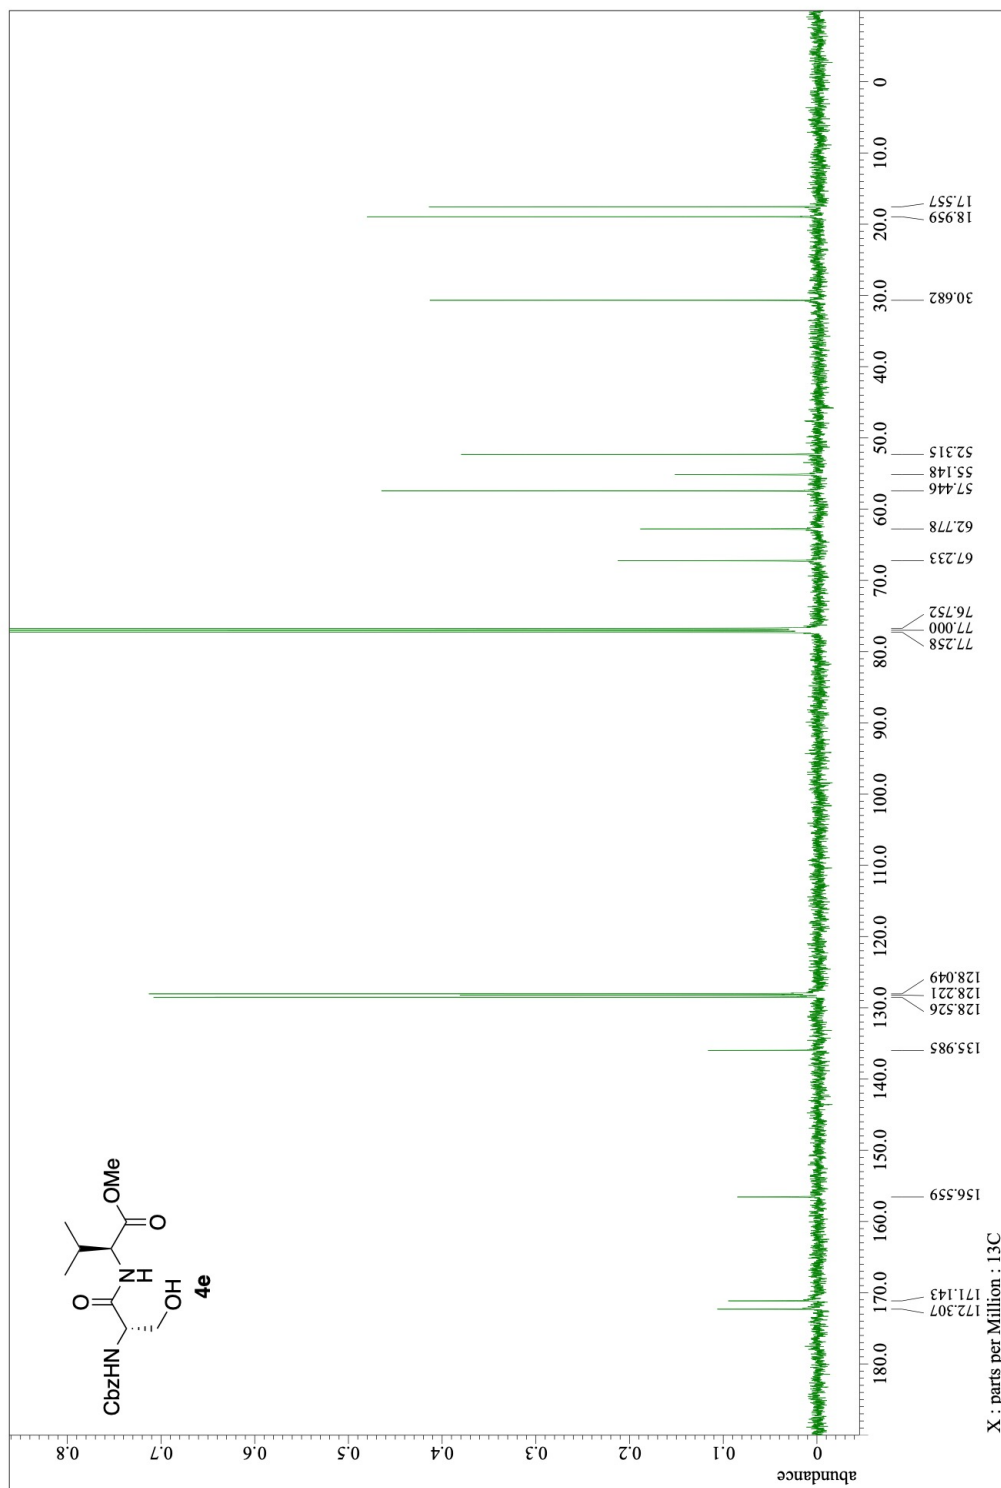

**<sup>1</sup>H NMR spectrum of 4f (400 MHz, CDCl<sub>3</sub>)**

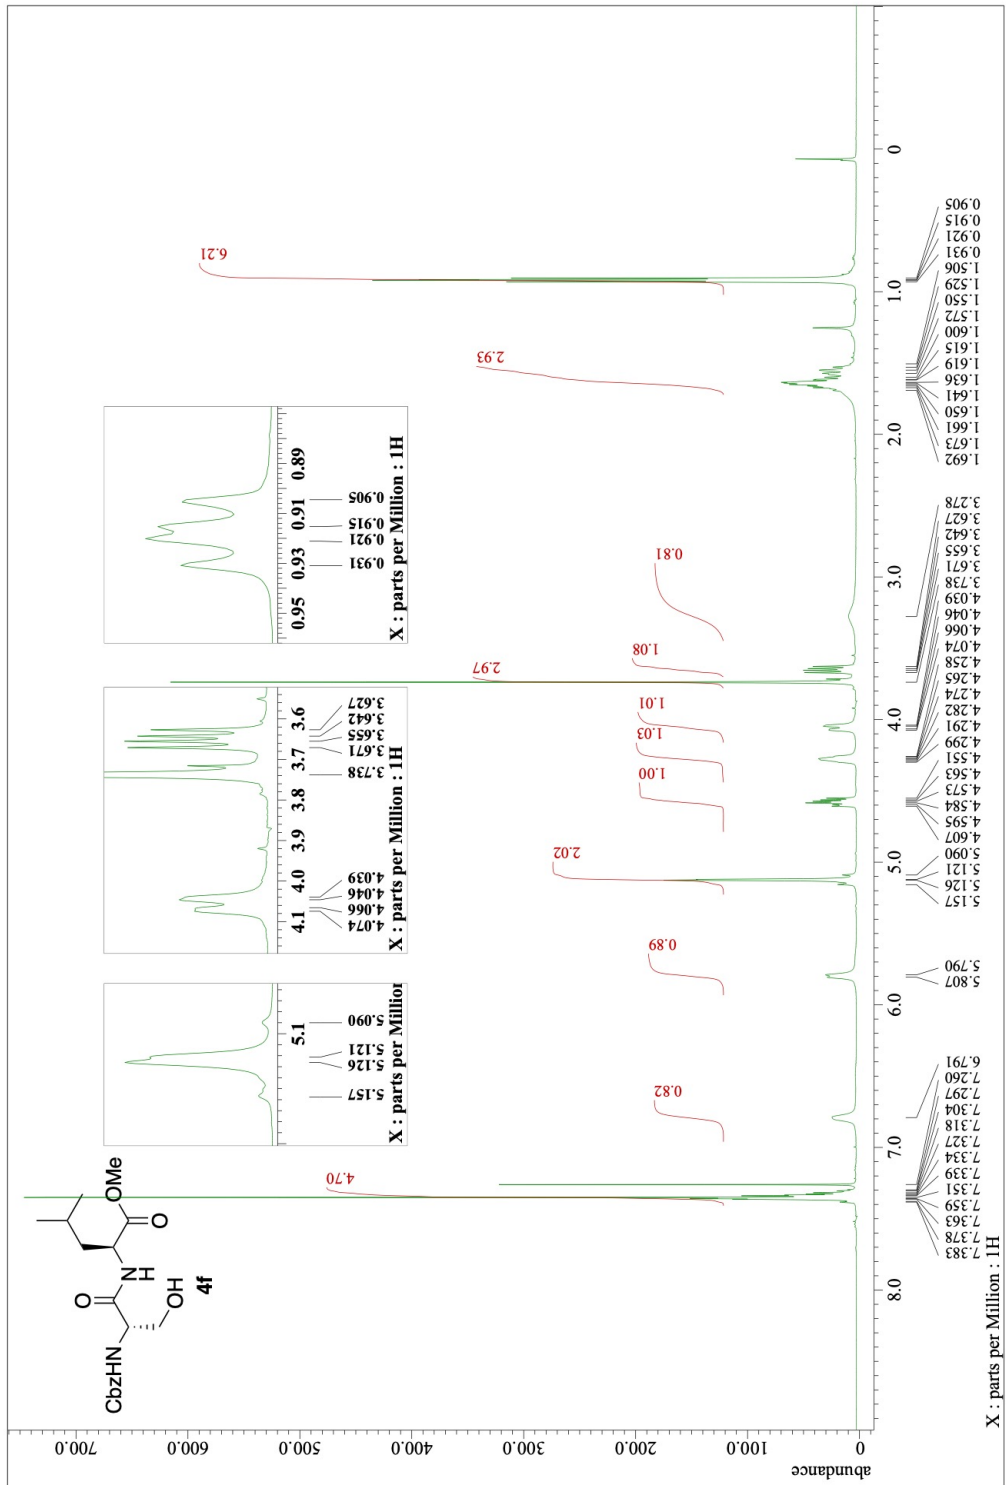



**<sup>13</sup>C NMR spectrum of 4f (100 MHz, CDCl<sub>3</sub>)**

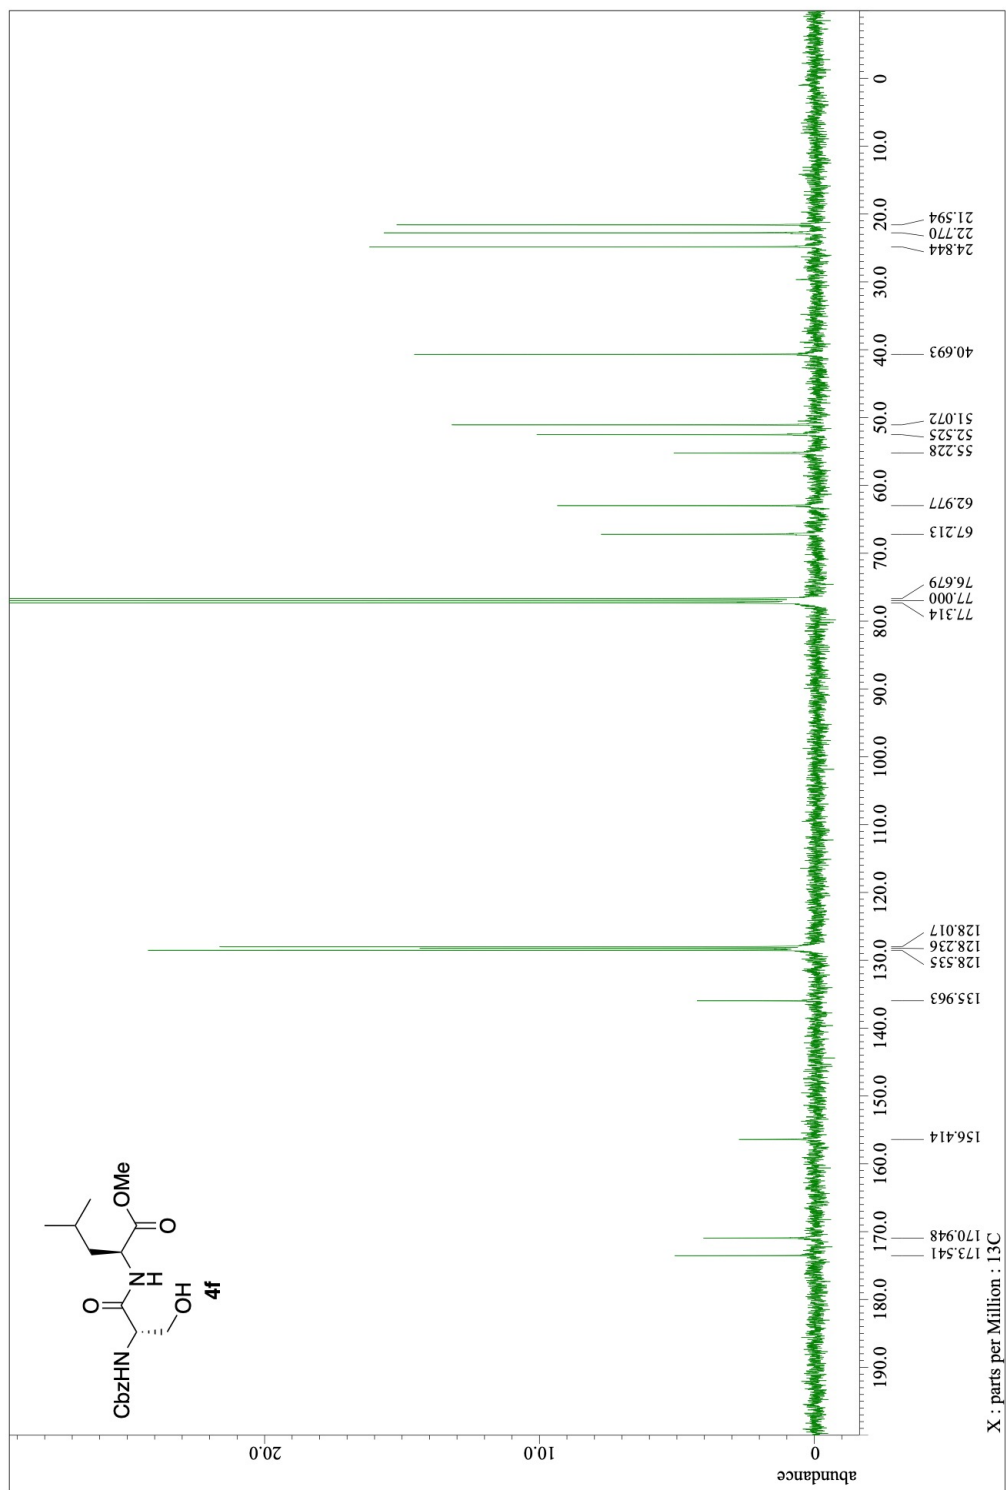

**<sup>1</sup>H NMR spectrum of 4g (400 MHz, CDCl<sub>3</sub>)**

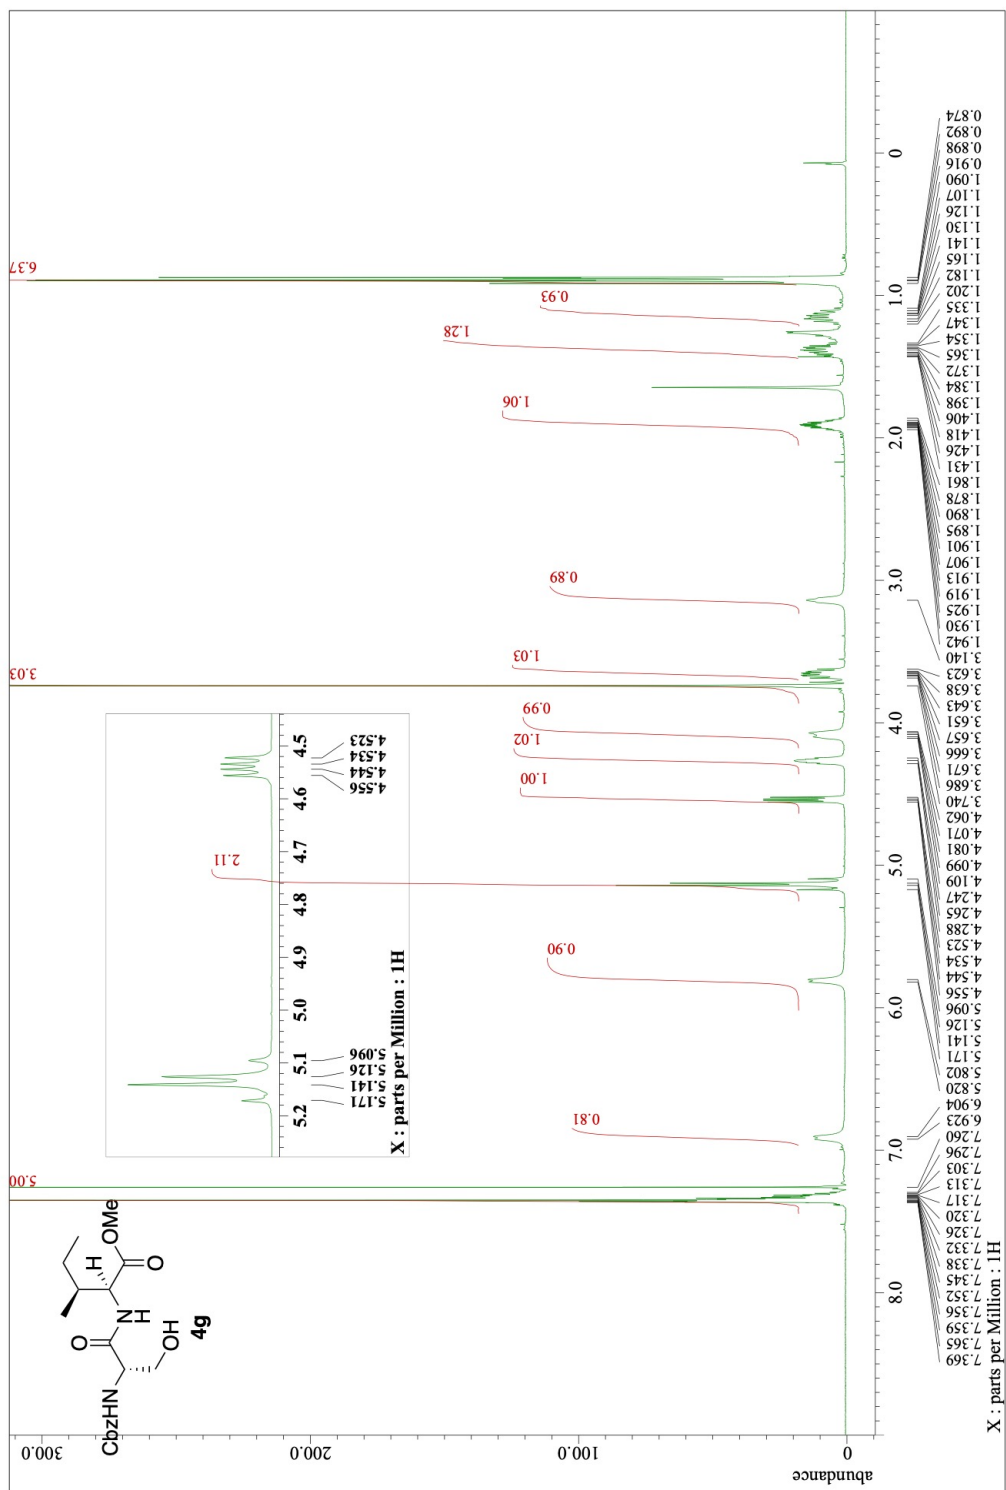

**<sup>13</sup>C NMR spectrum of 4g (100 MHz, CDCl<sub>3</sub>)**

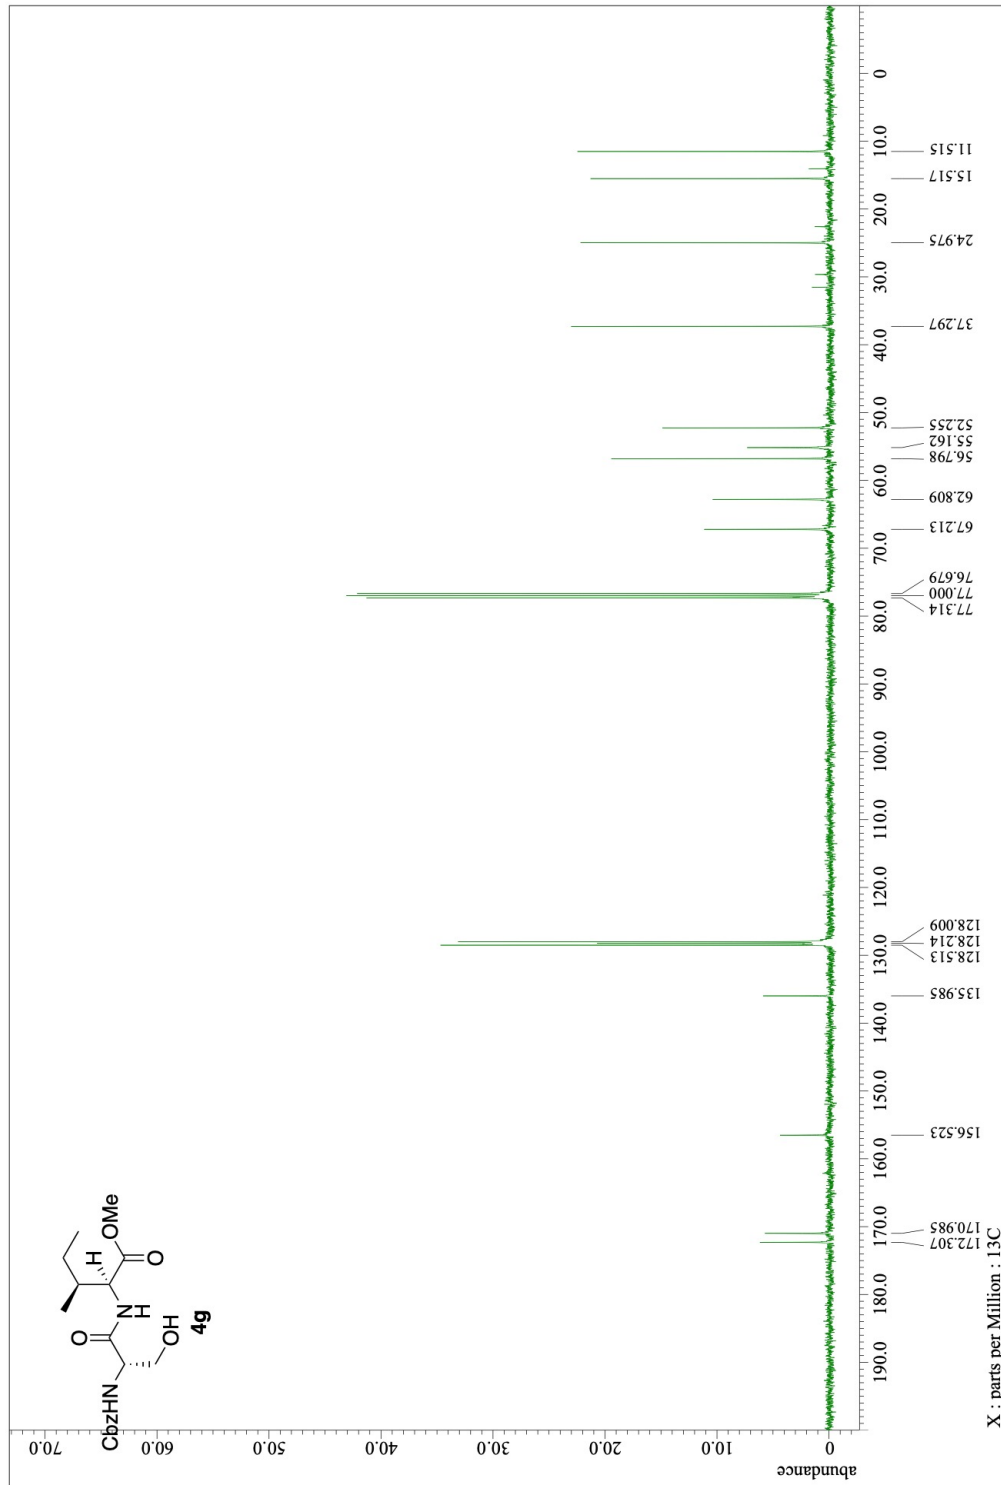

# <sup>1</sup>H NMR spectrum of 4h (270 MHz, CDCl<sub>3</sub>)

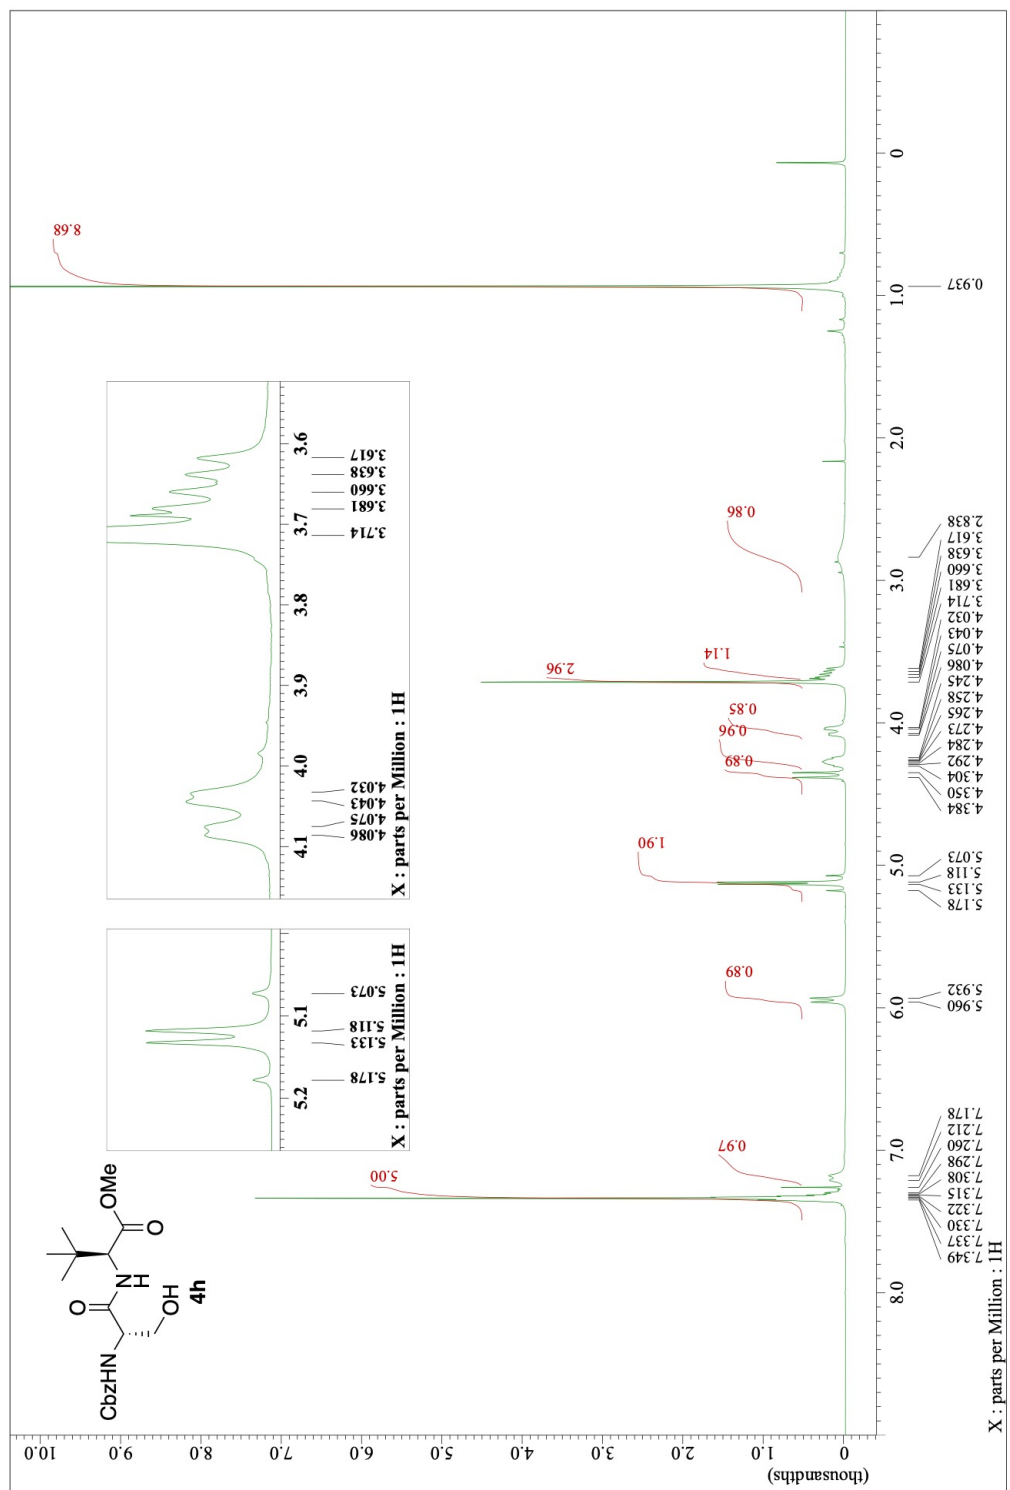

**<sup>13</sup>C NMR spectrum of 4h (126 MHz, CDCl<sub>3</sub>)**

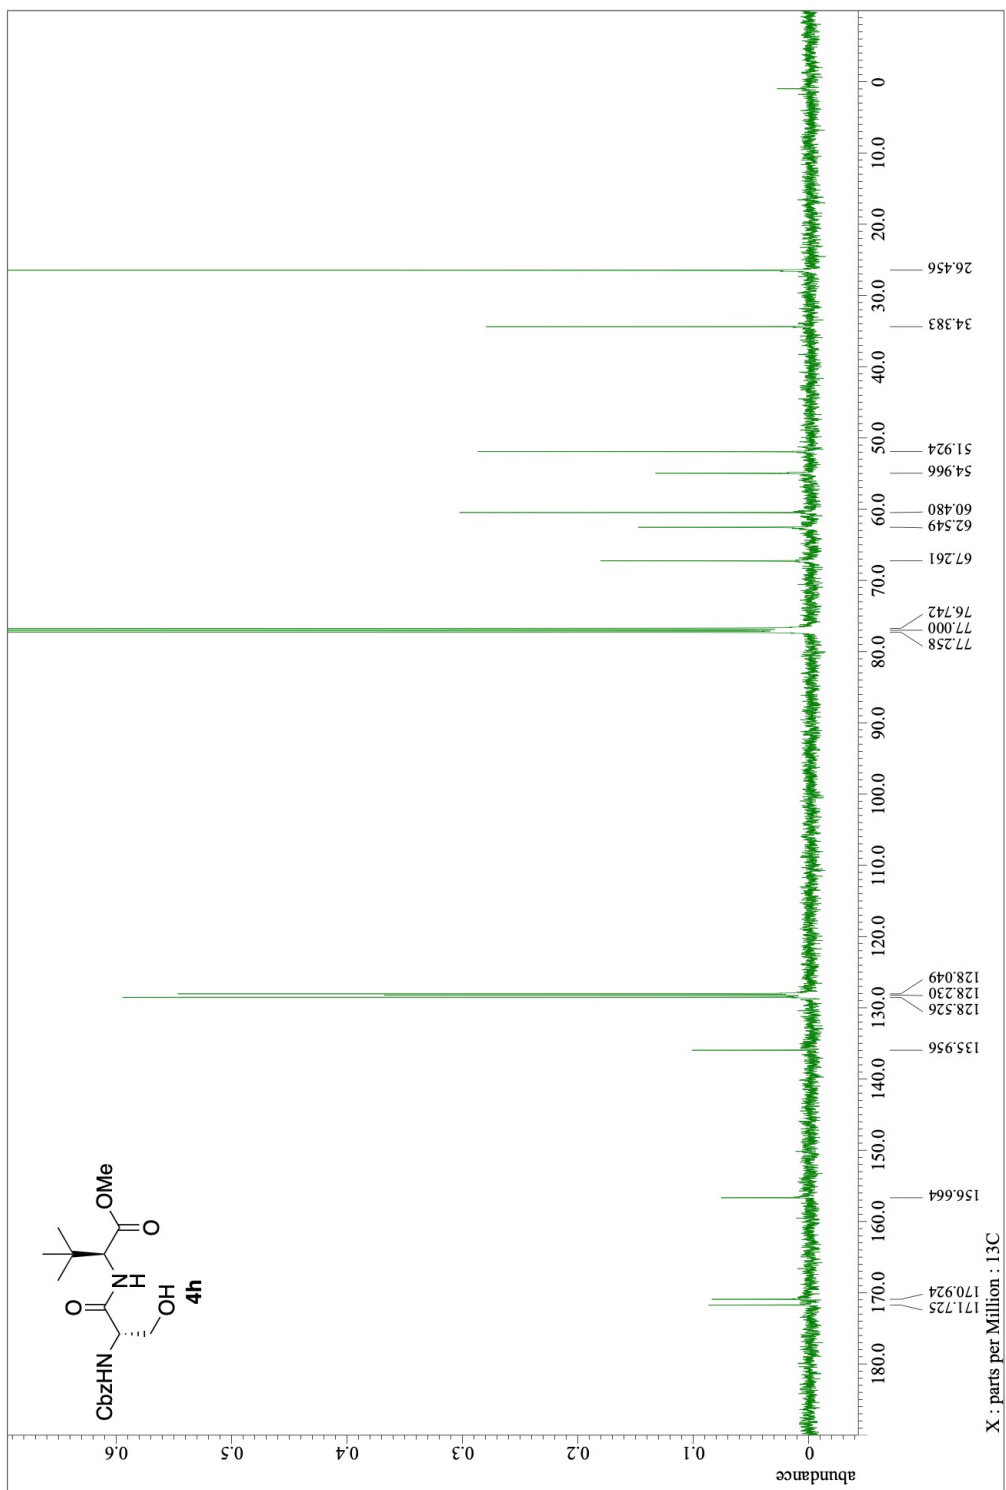

**<sup>1</sup>H NMR spectrum of 4i (500 MHz, CDCl<sub>3</sub>)**

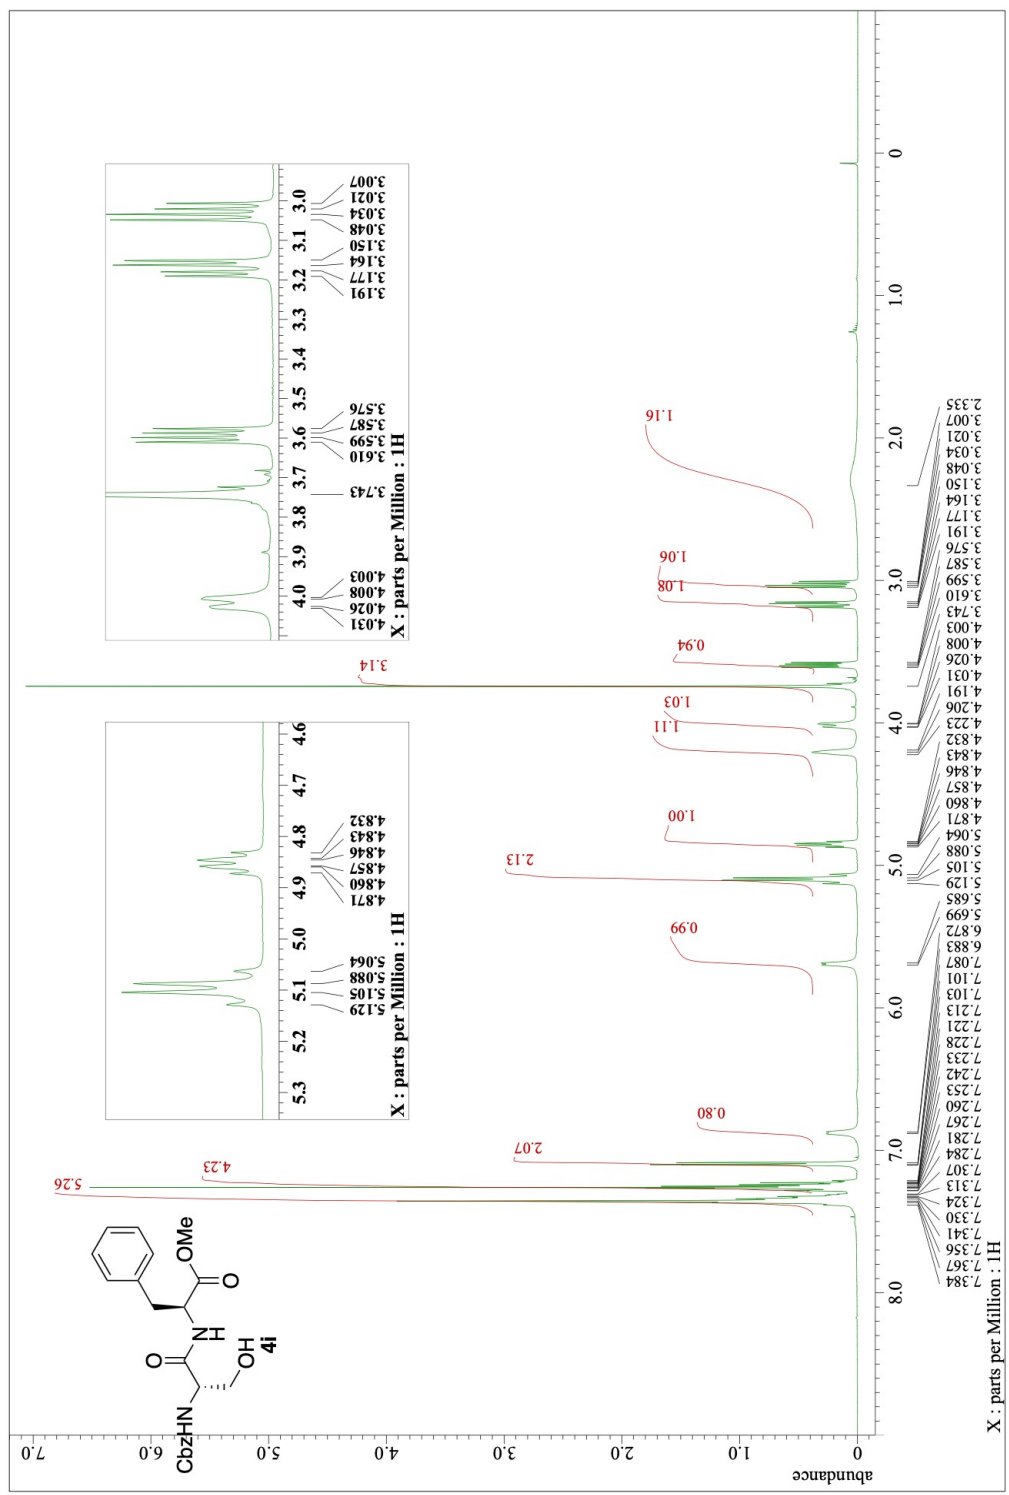

**<sup>13</sup>C NMR spectrum of 4i (126 MHz, CDCl<sub>3</sub>)**

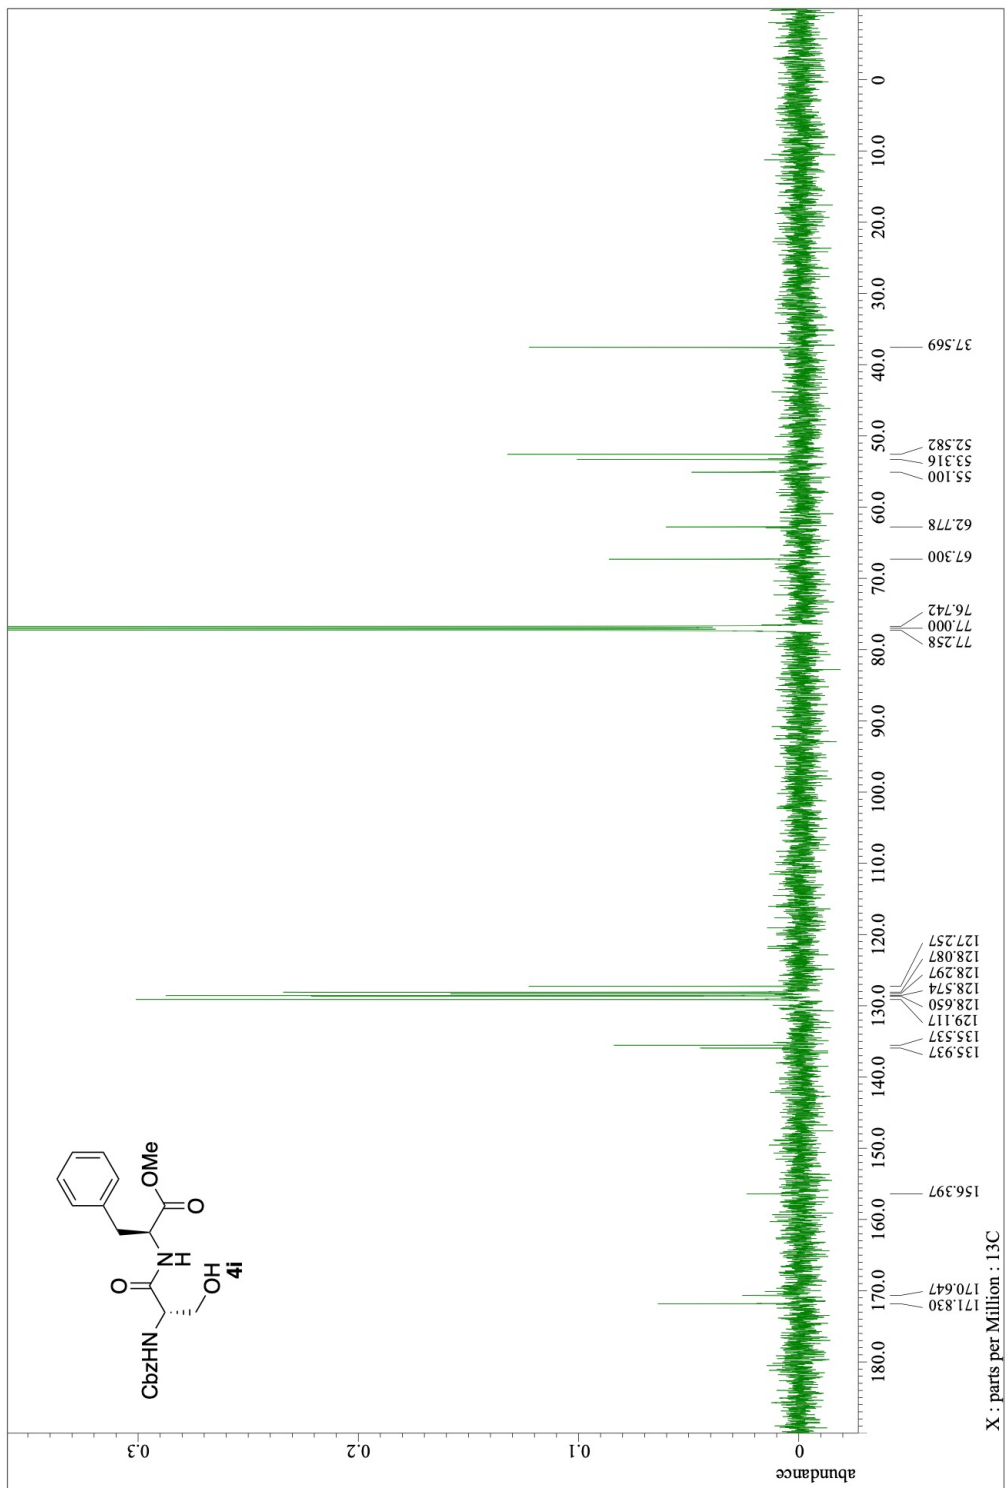

**<sup>1</sup>H NMR spectrum of 4j (500 MHz, CDCl<sub>3</sub>)**

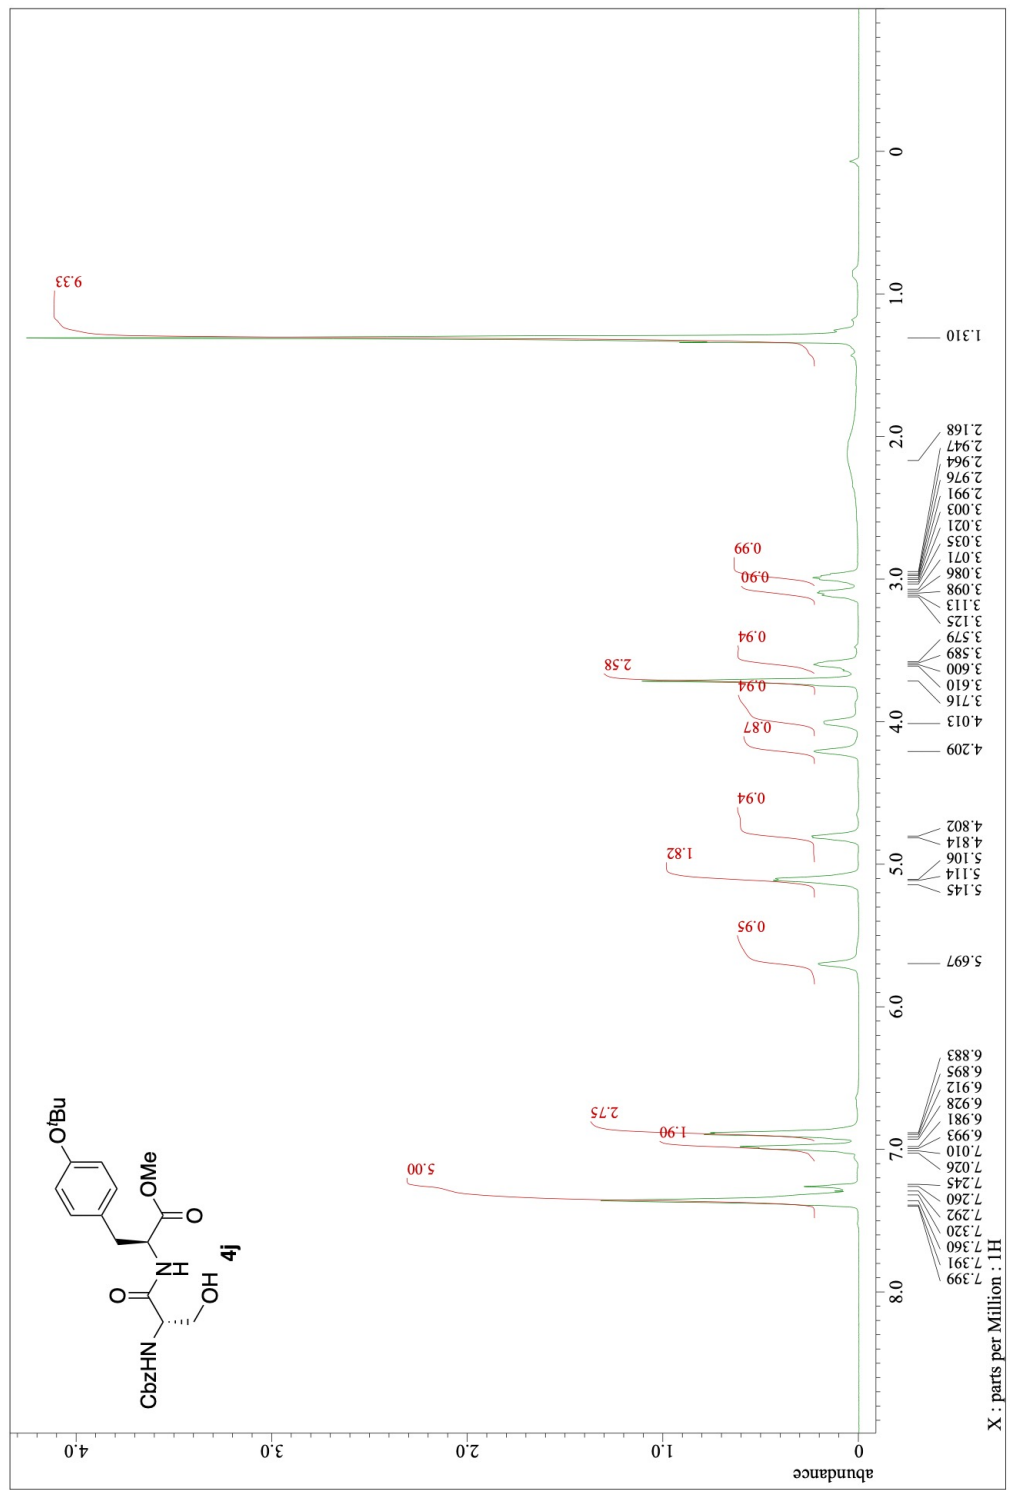



**$^{13}\text{C}$  NMR spectrum of 4j (126 MHz,  $\text{CDCl}_3$ )**

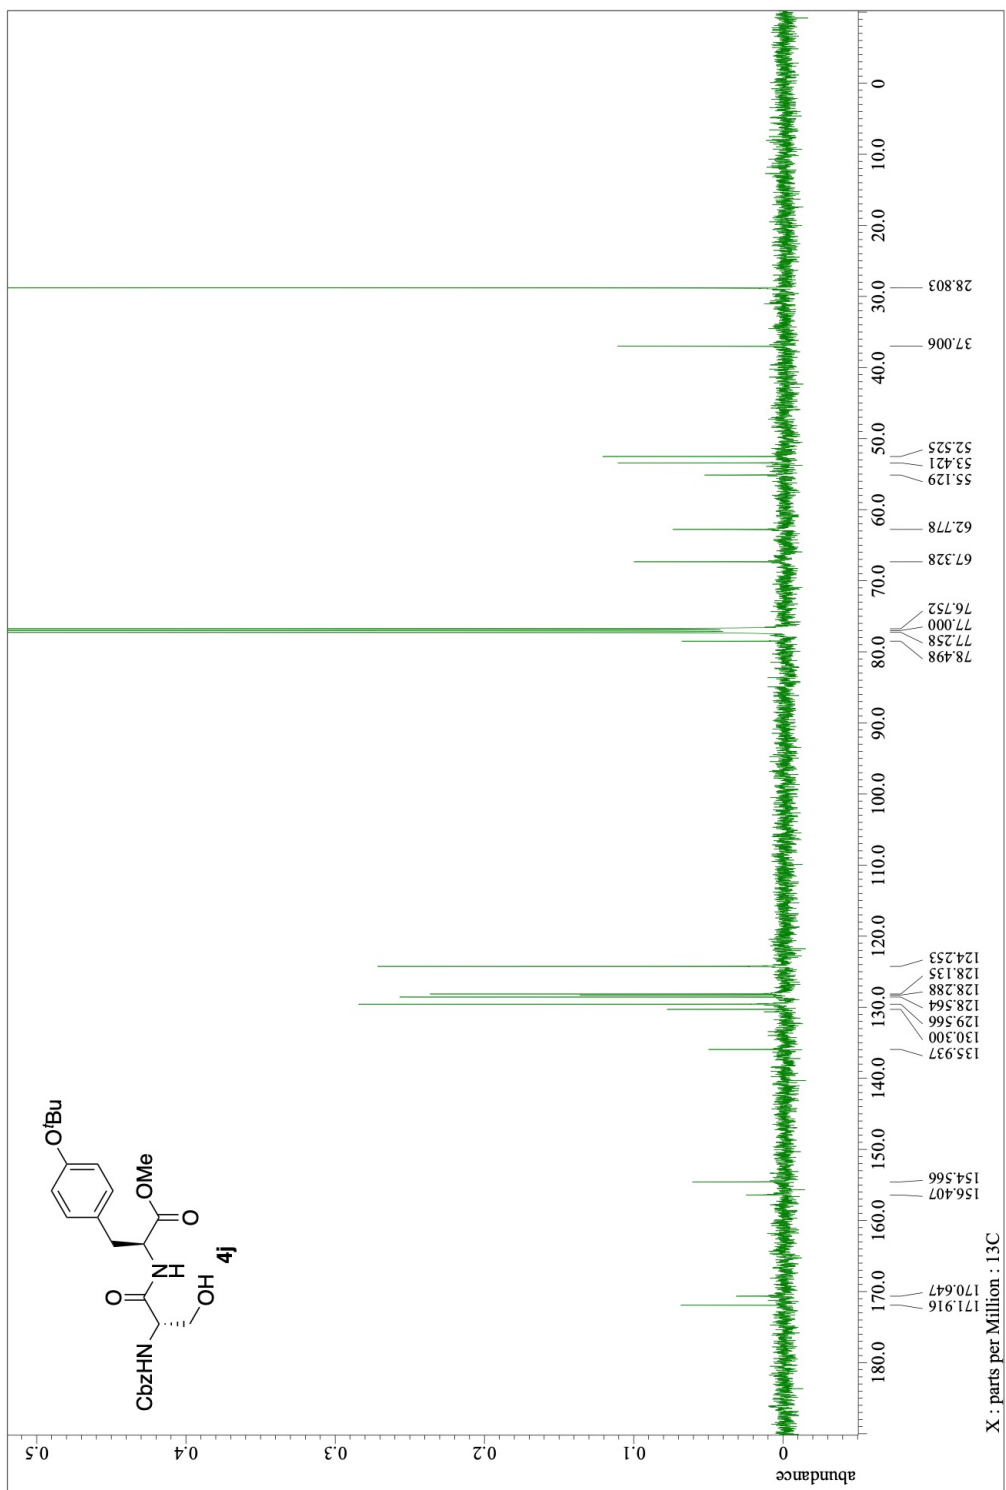

**<sup>1</sup>H NMR spectrum of 4l (500 MHz, CDCl<sub>3</sub>)**

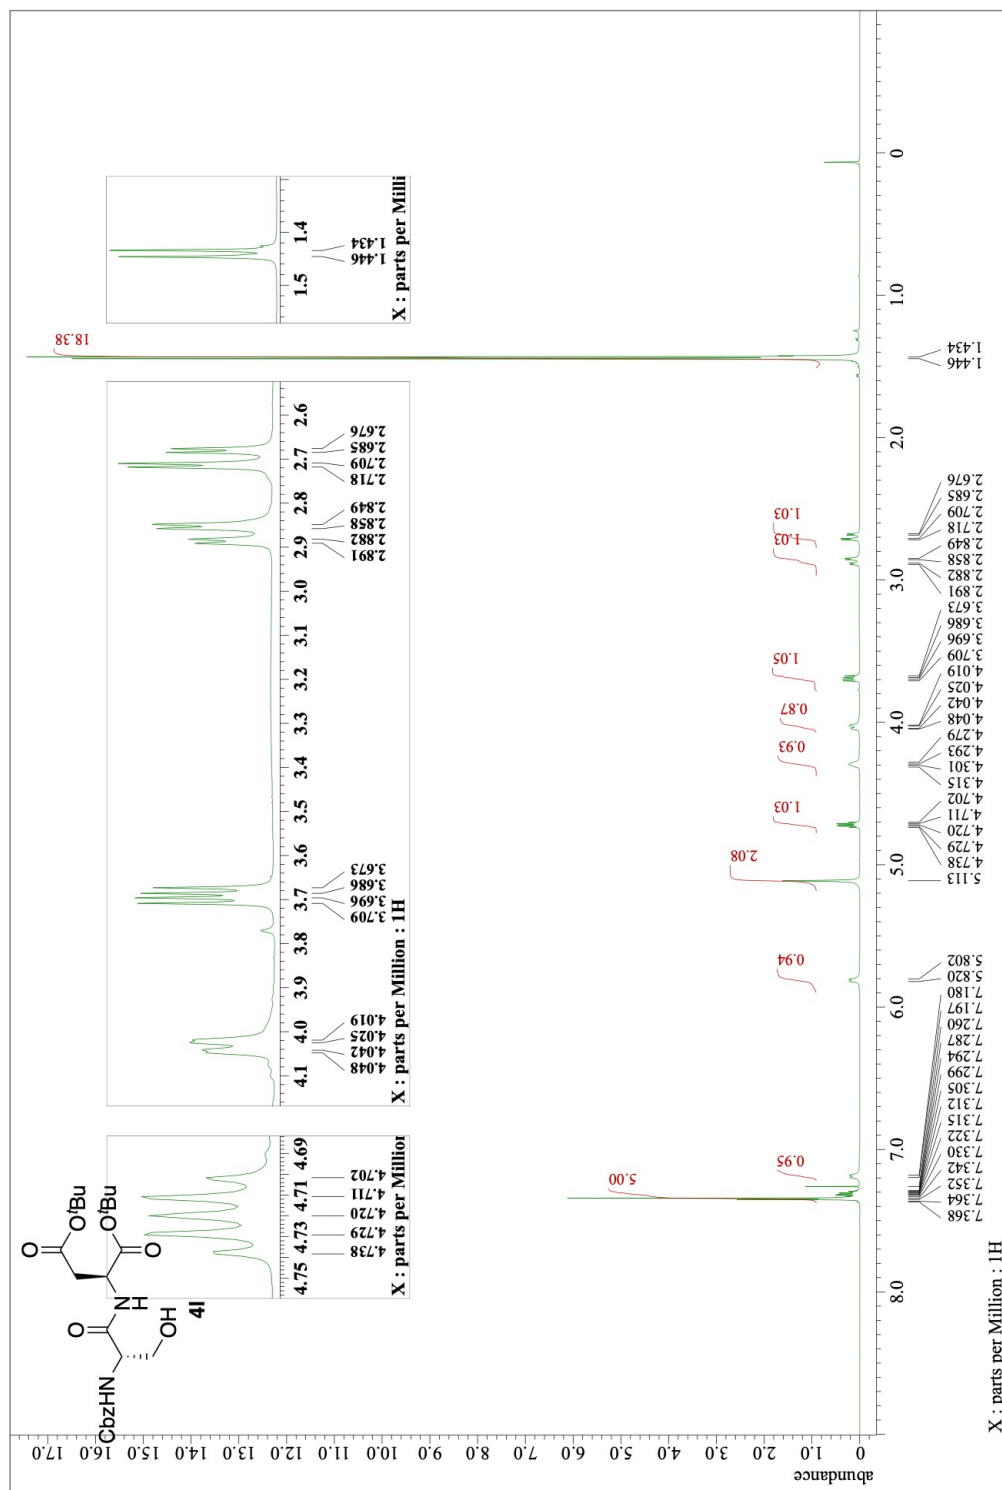

**<sup>13</sup>C NMR spectrum of 4I (126 MHz, CDCl<sub>3</sub>)**

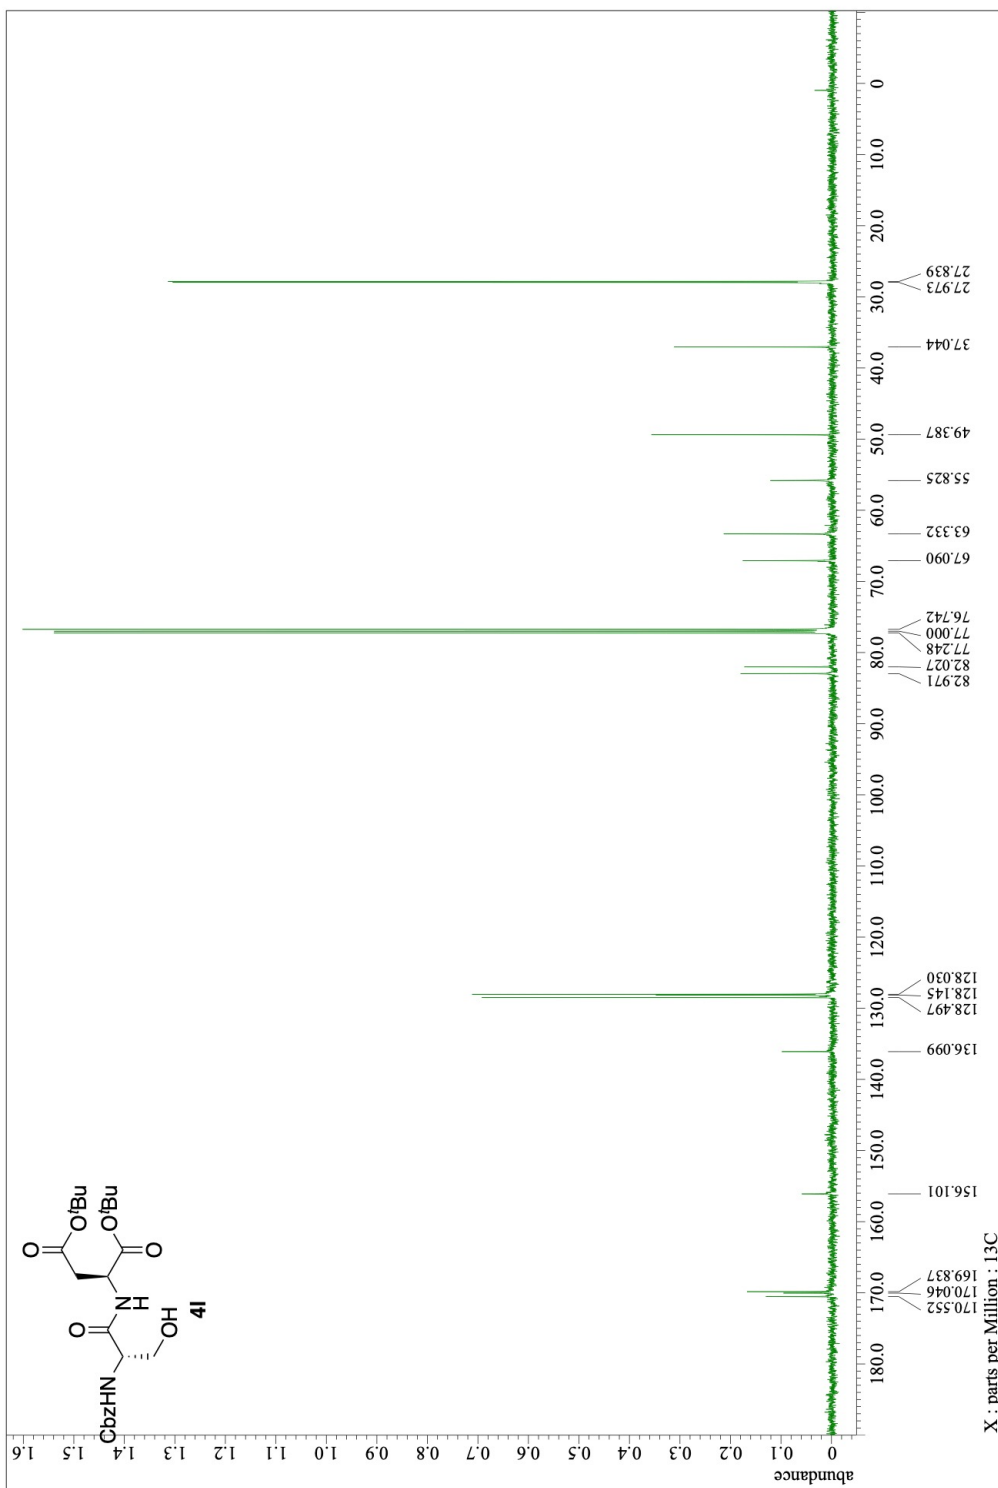

**<sup>1</sup>H NMR spectrum of 4m (270 MHz, CDCl<sub>3</sub>)**

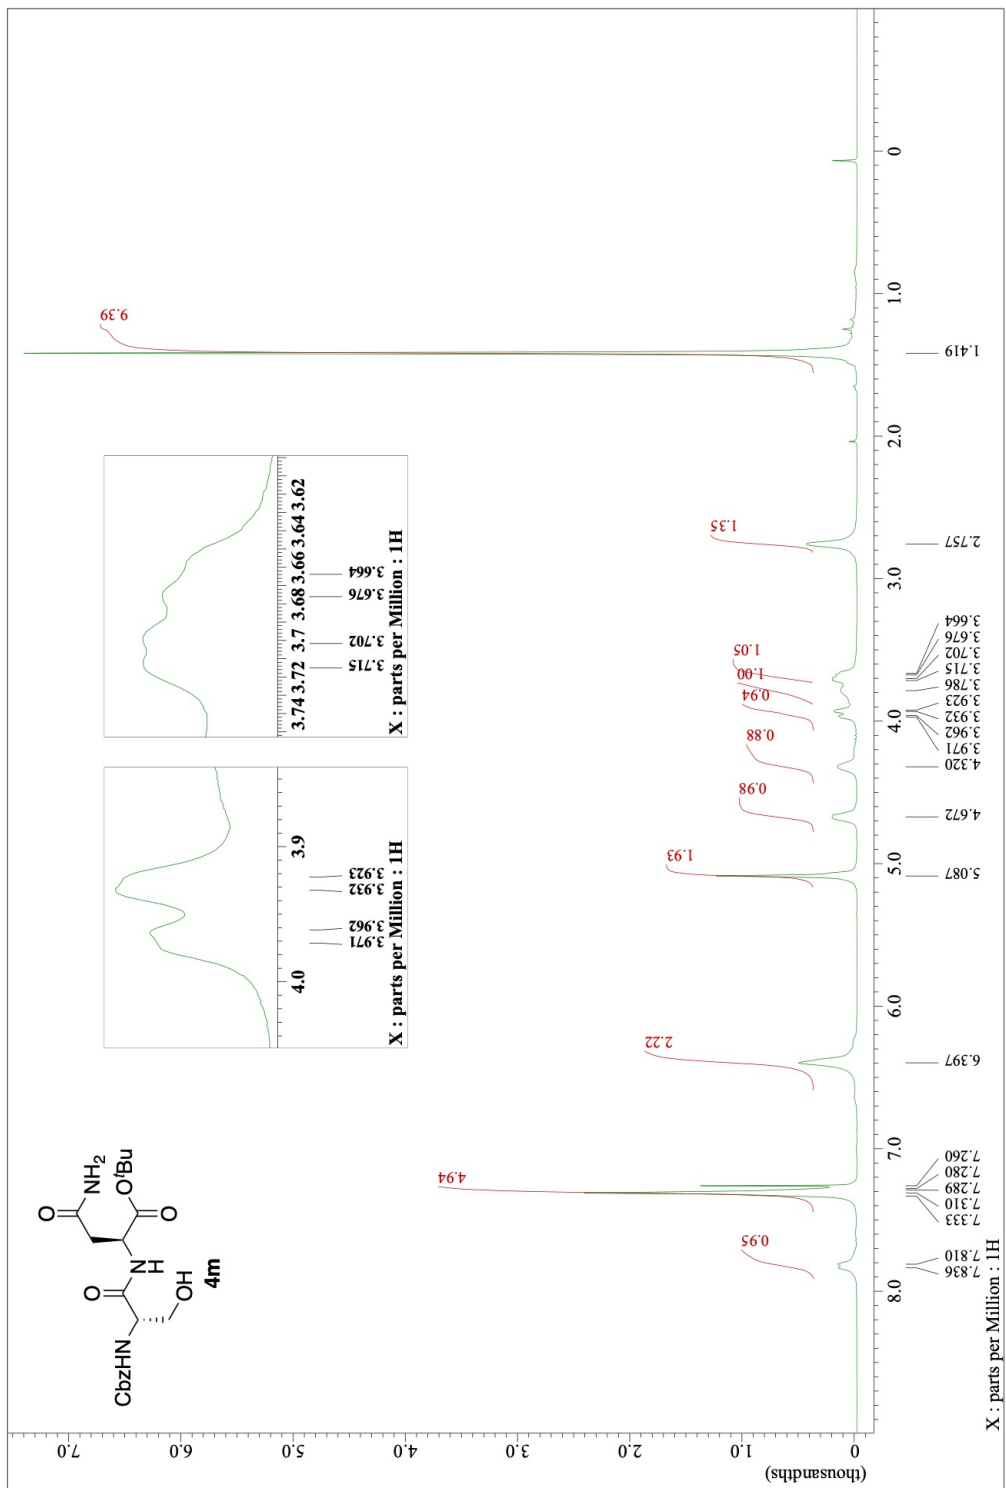

**<sup>13</sup>C NMR spectrum of 4m (126 MHz, CDCl<sub>3</sub>)**

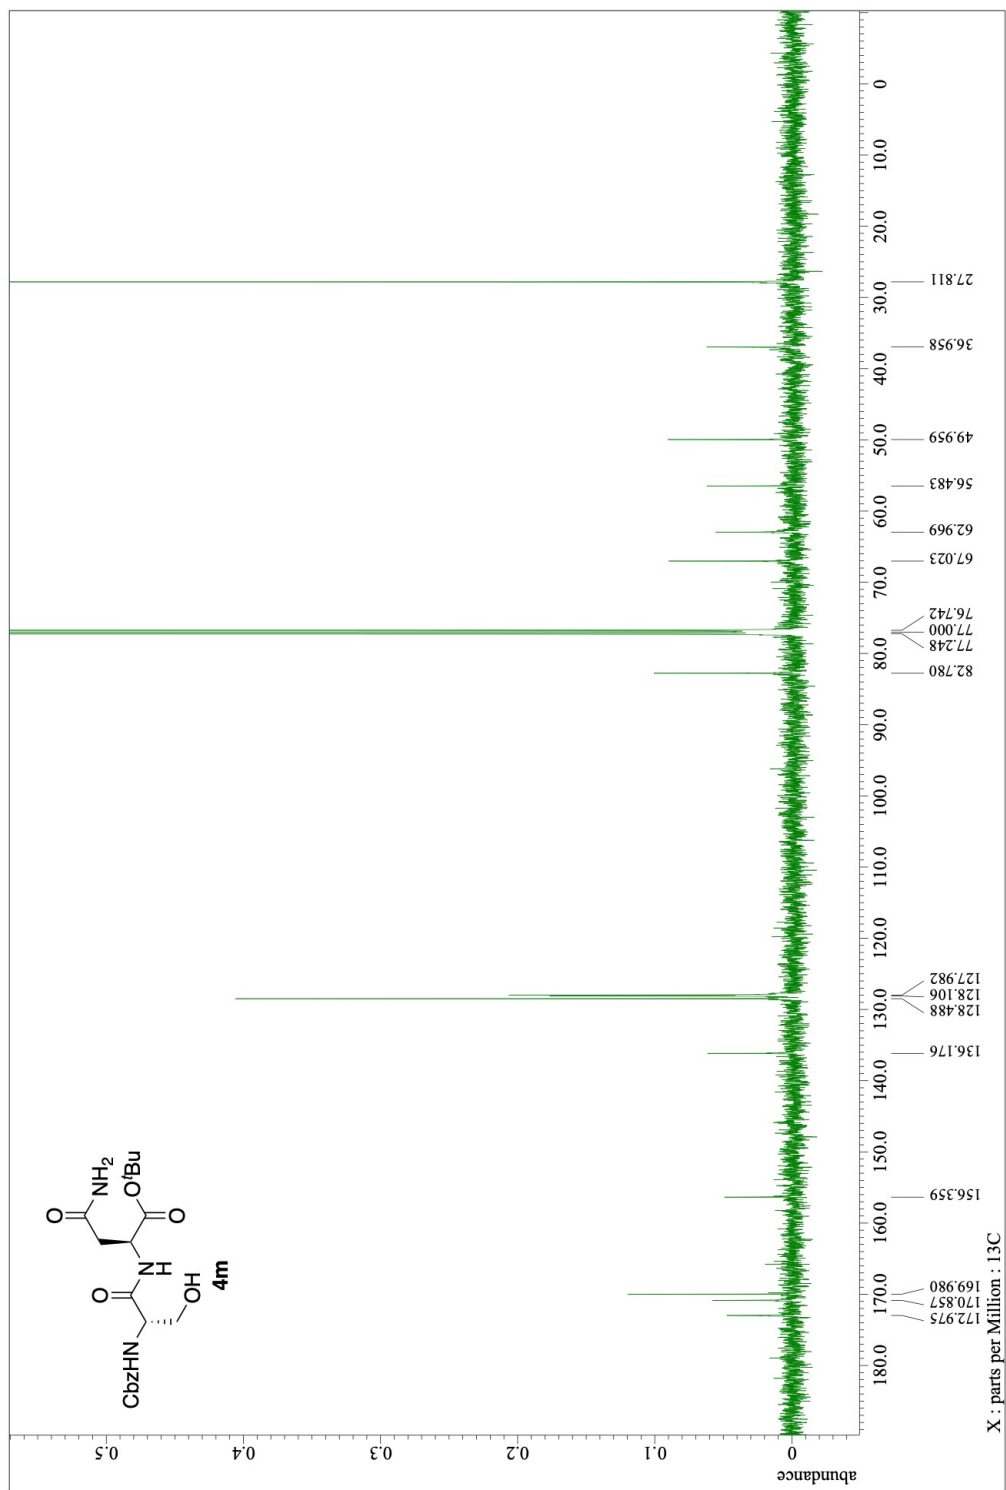

**<sup>1</sup>H NMR spectrum of 4n (500 MHz, CDCl<sub>3</sub>)**

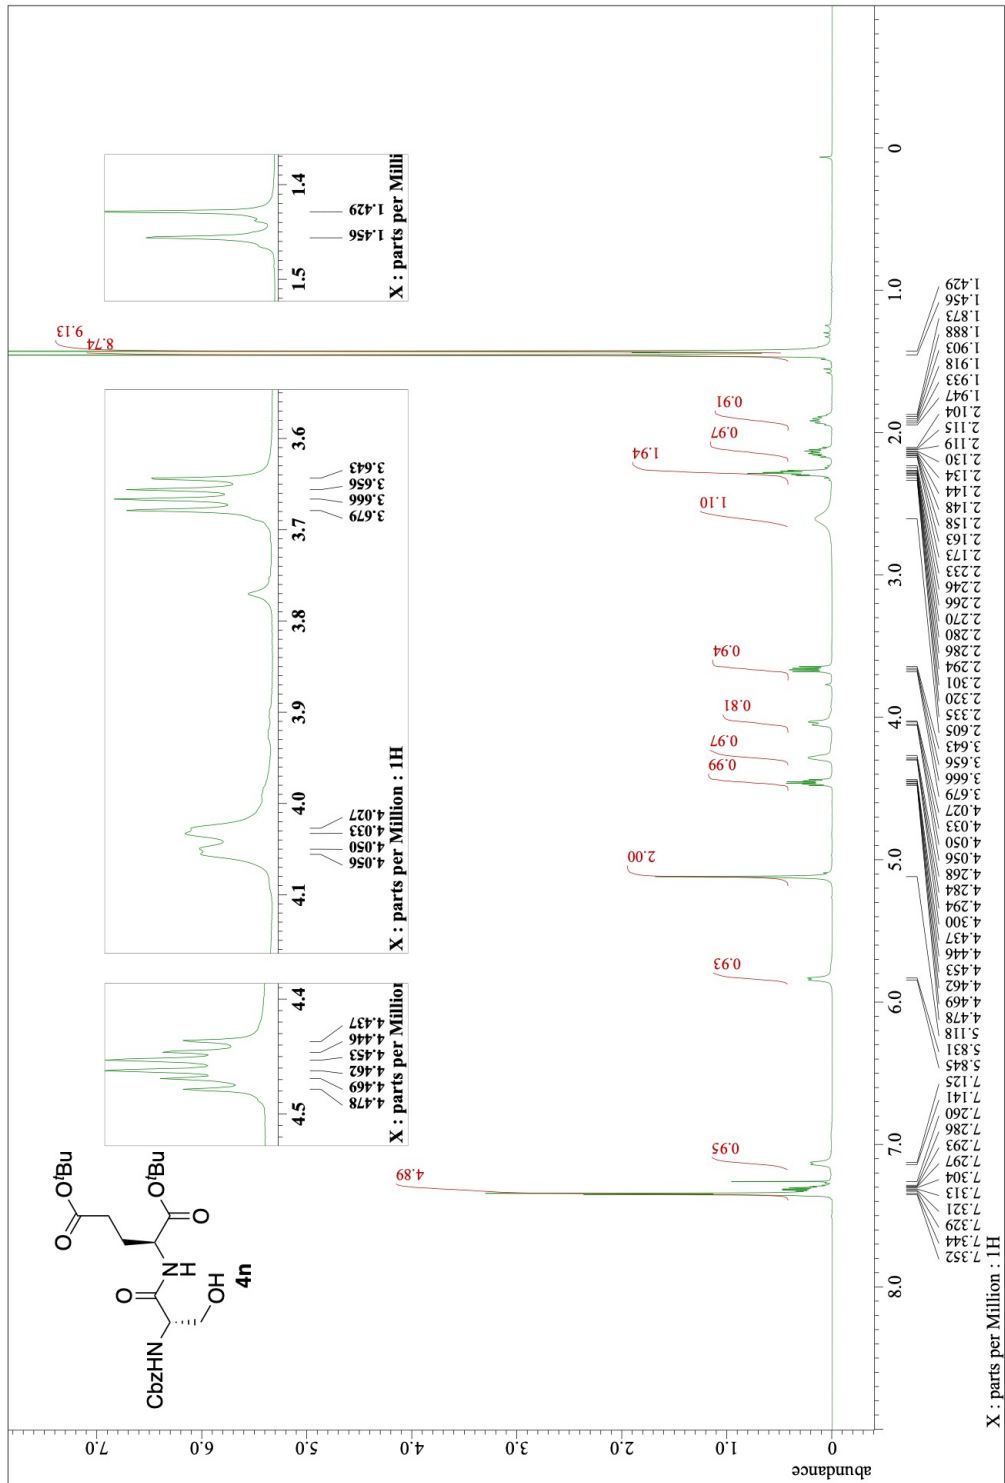

**$^{13}\text{C}$  NMR spectrum of 4n (126 MHz,  $\text{CDCl}_3$ )**

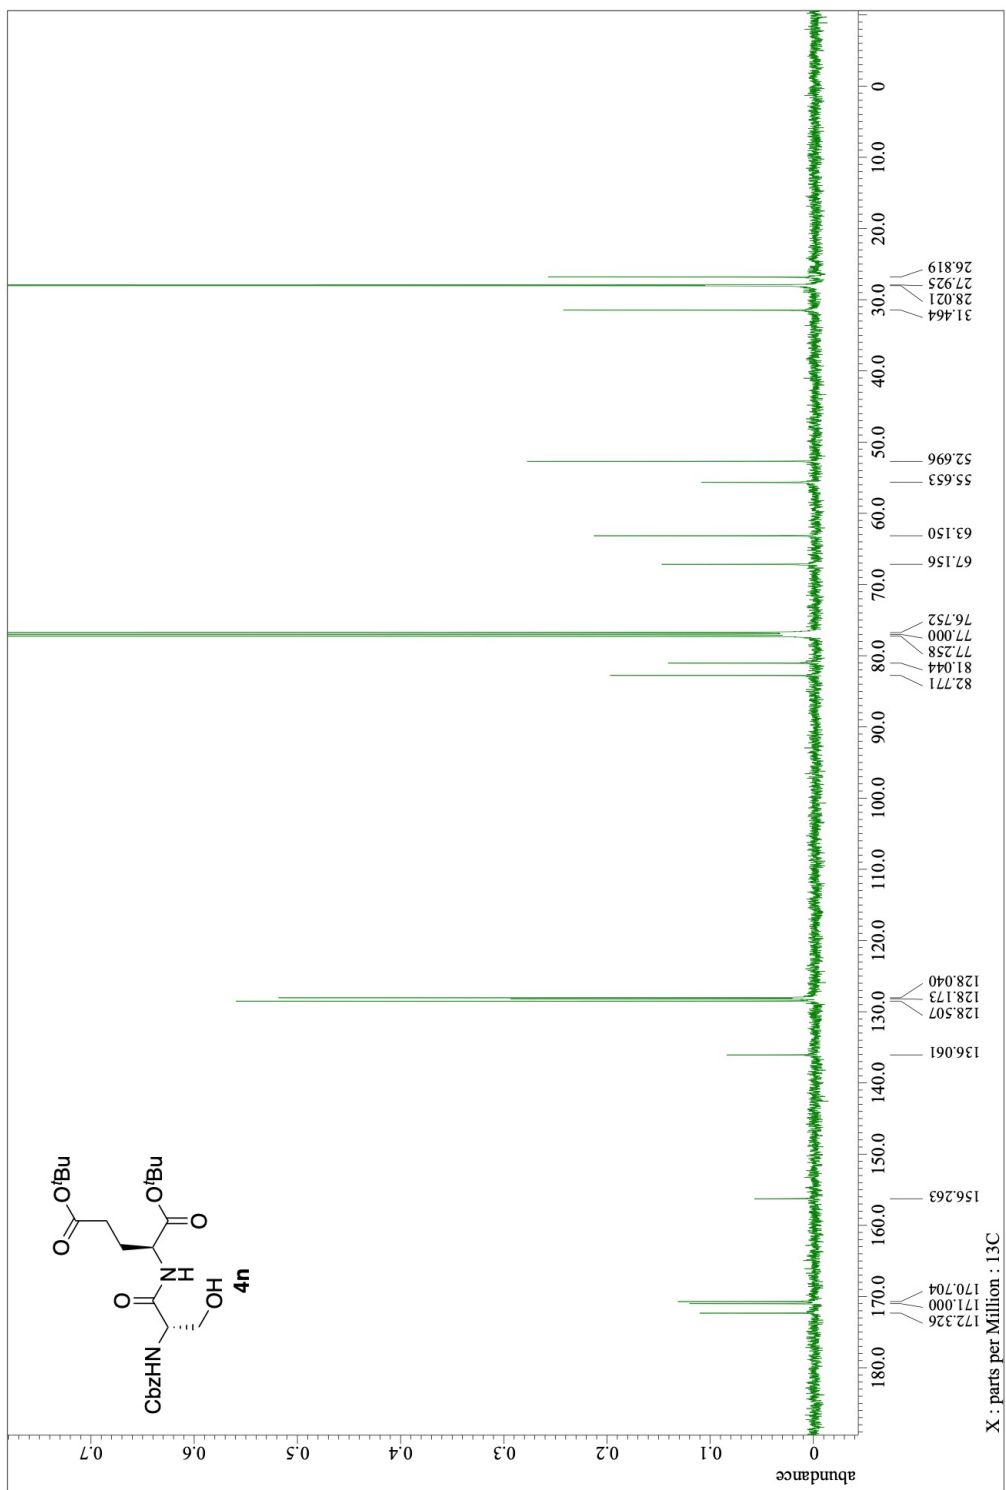

# <sup>1</sup>H NMR spectrum of 4o (270 MHz, CDCl<sub>3</sub>)

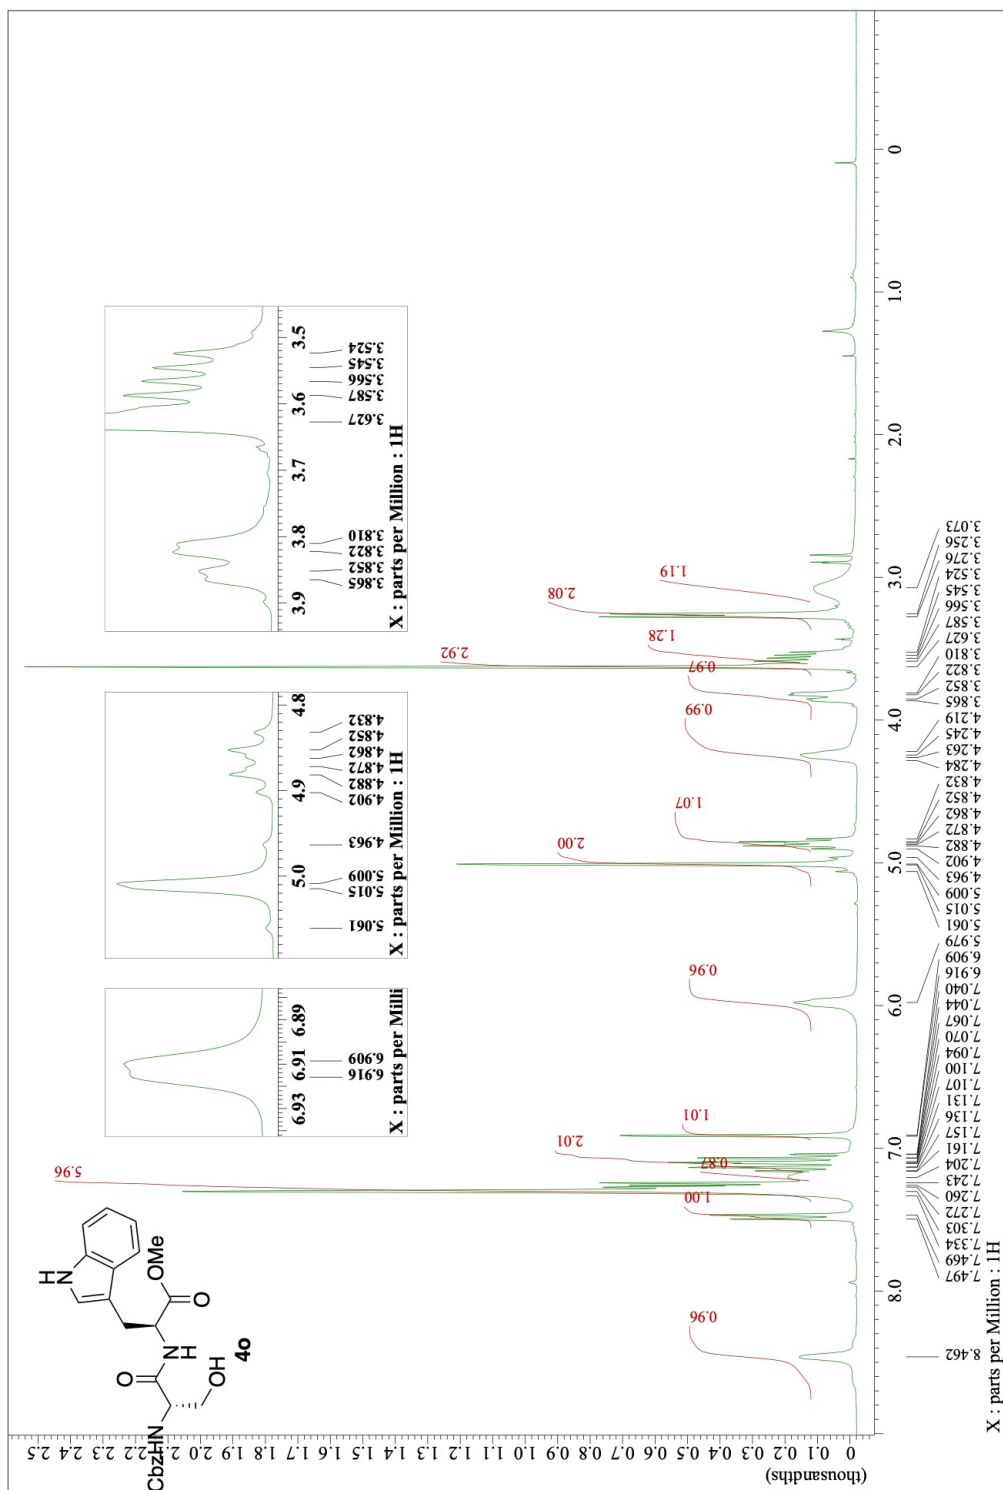



**<sup>13</sup>C NMR spectrum of 4o (126 MHz, CDCl<sub>3</sub>)**

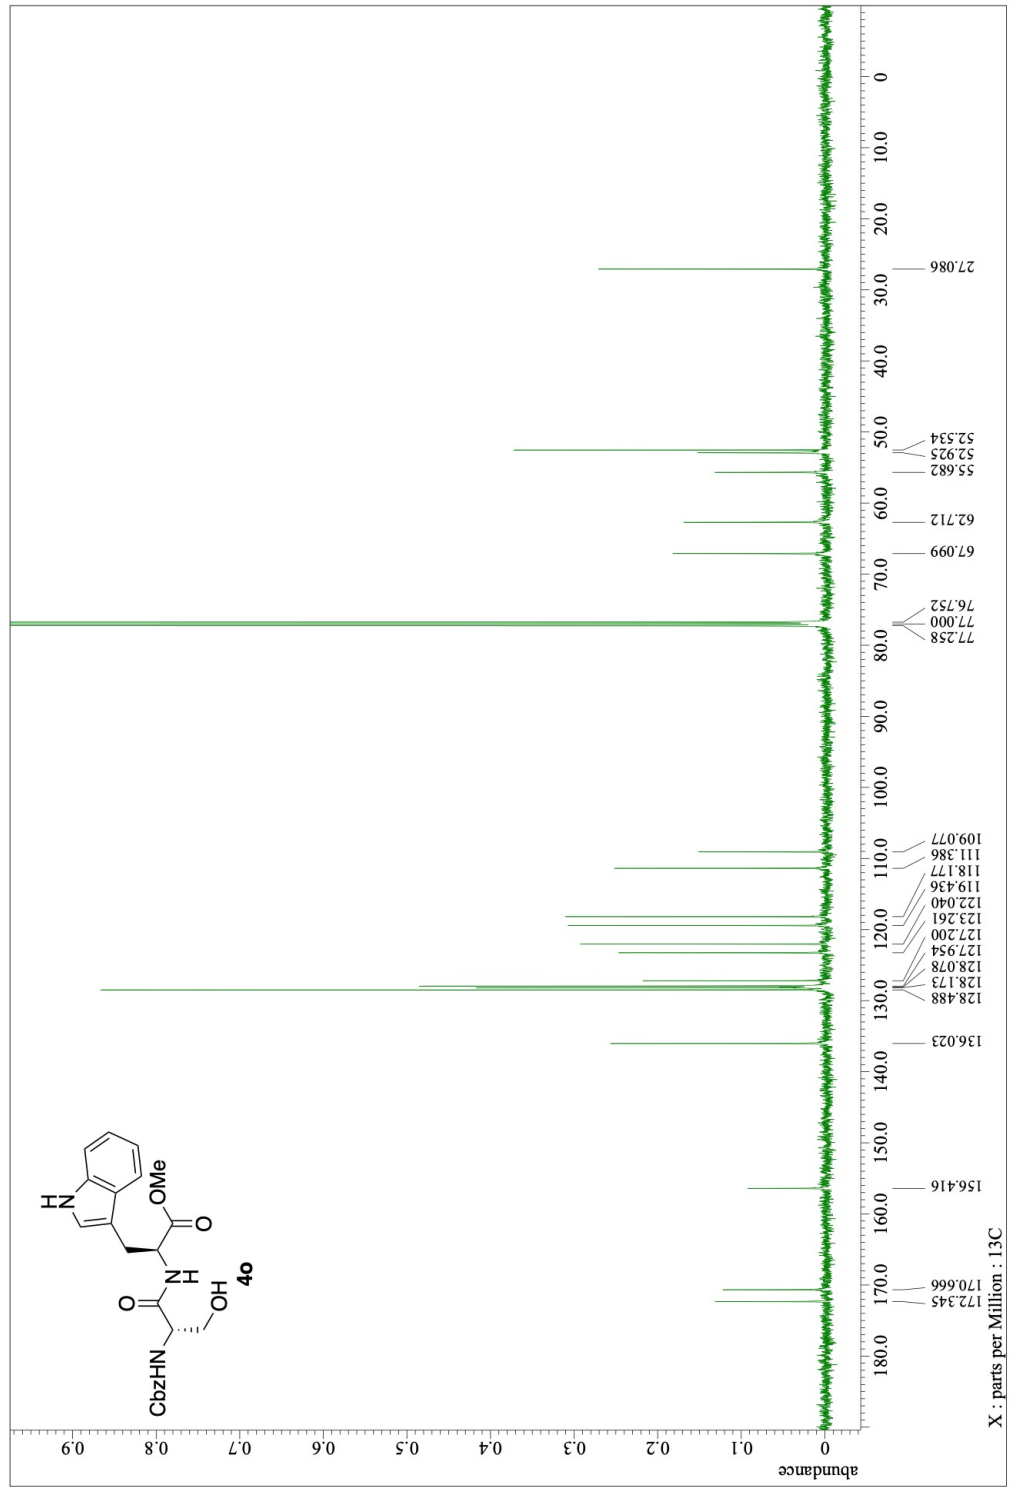

**<sup>1</sup>H NMR spectrum of 4p (500 MHz, CDCl<sub>3</sub>)**

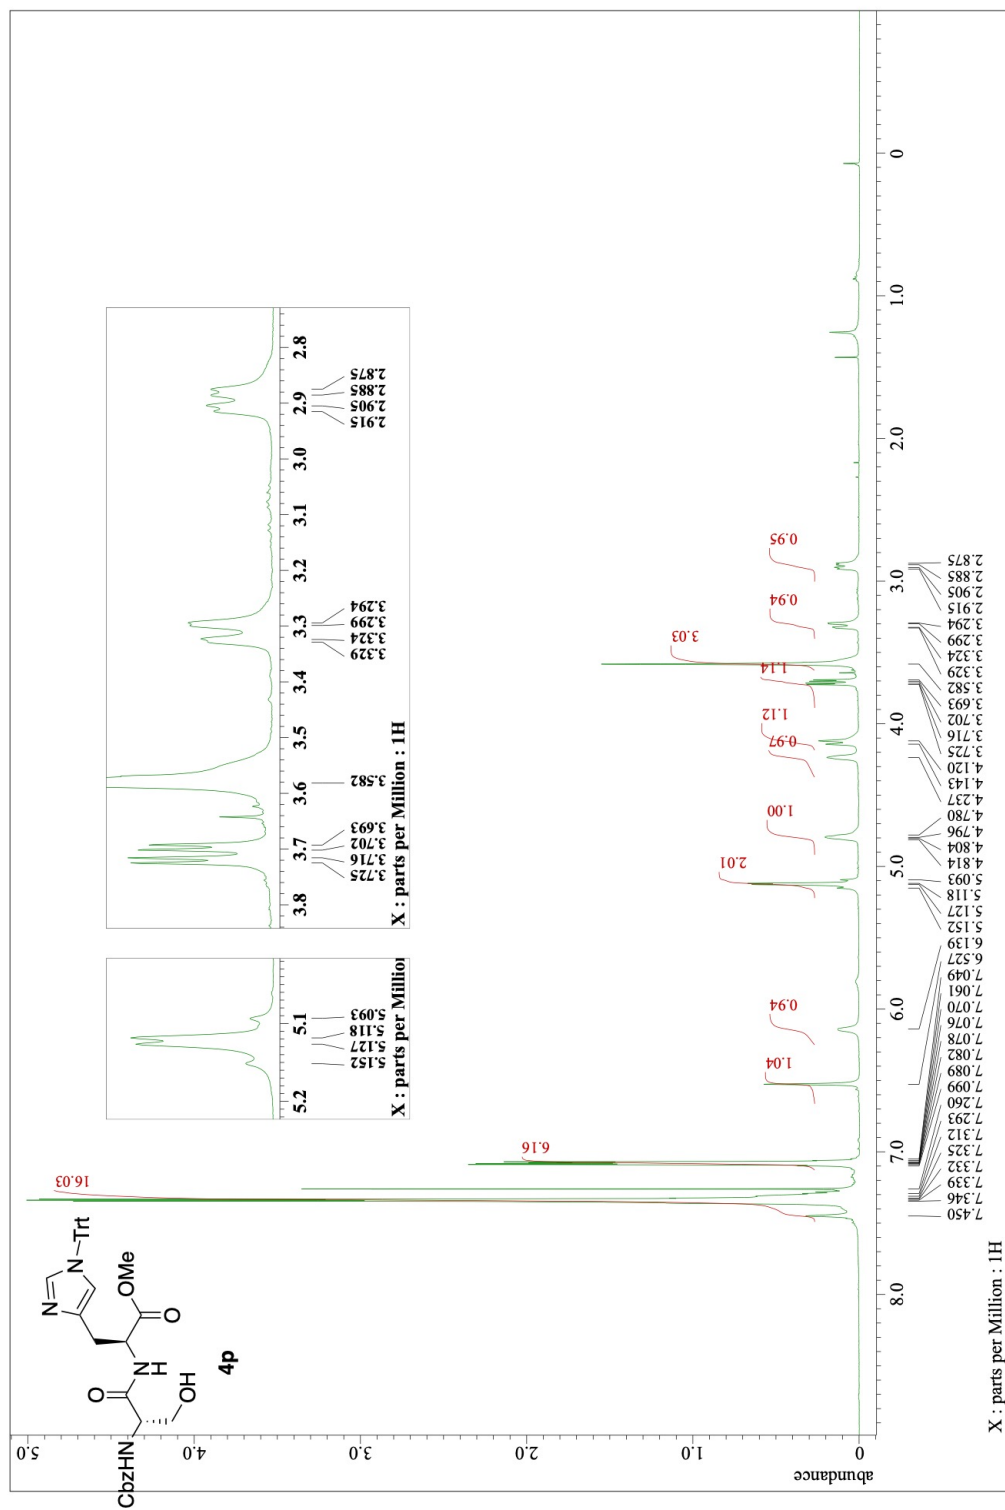

**<sup>13</sup>C NMR spectrum of 4p (126 MHz, CDCl<sub>3</sub>)**

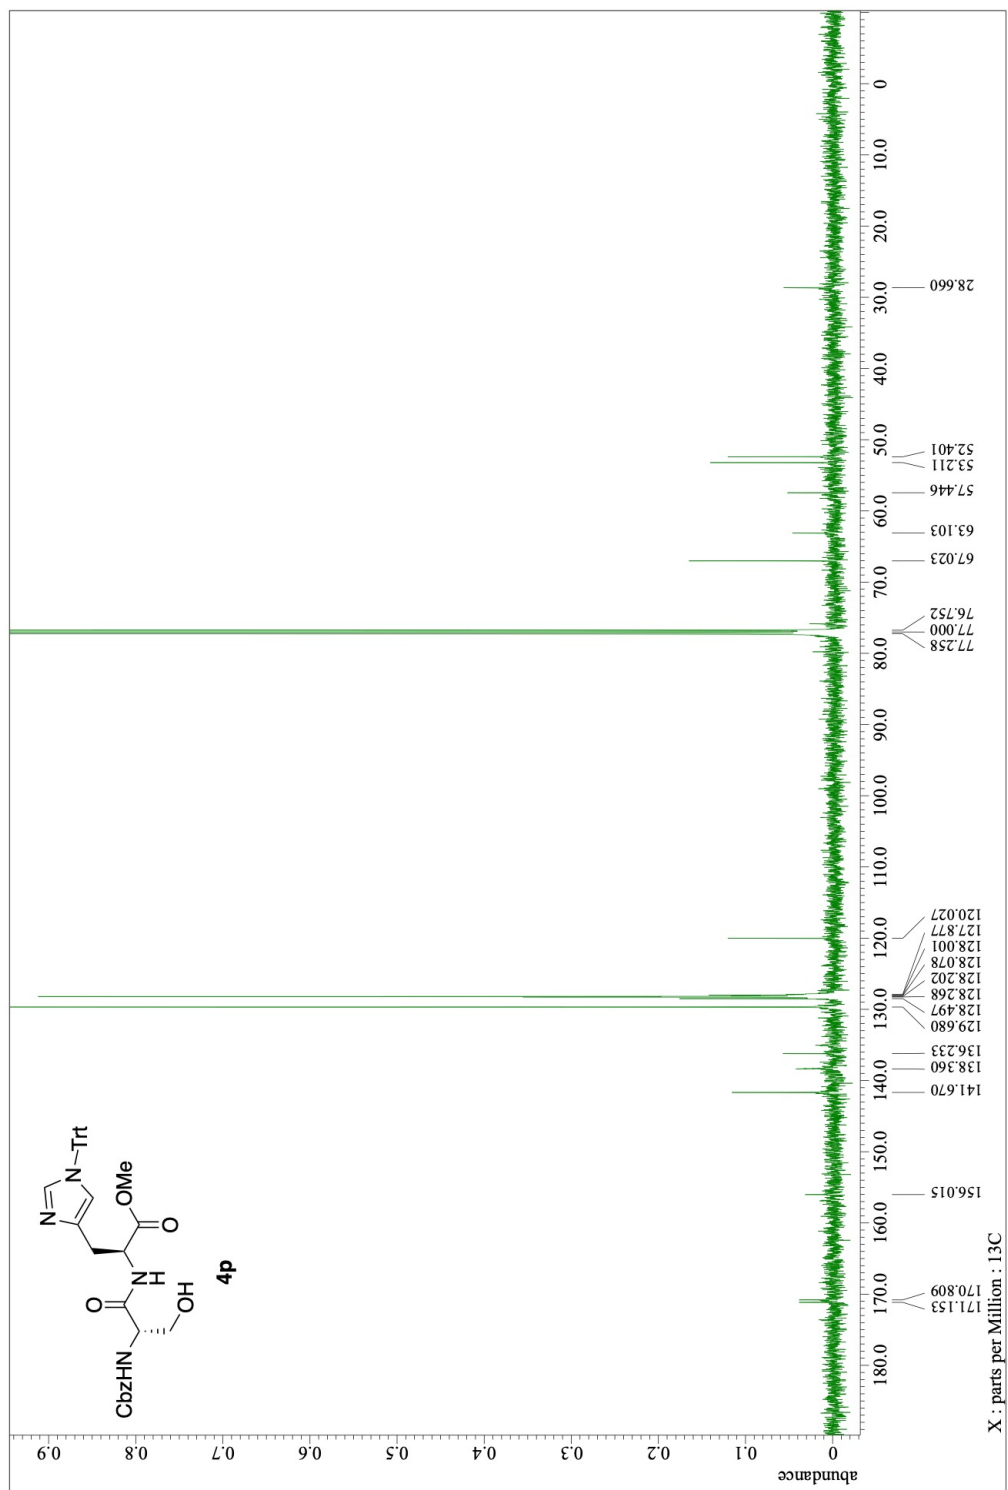

**<sup>1</sup>H NMR spectrum of 4q (270 MHz, CDCl<sub>3</sub>)**

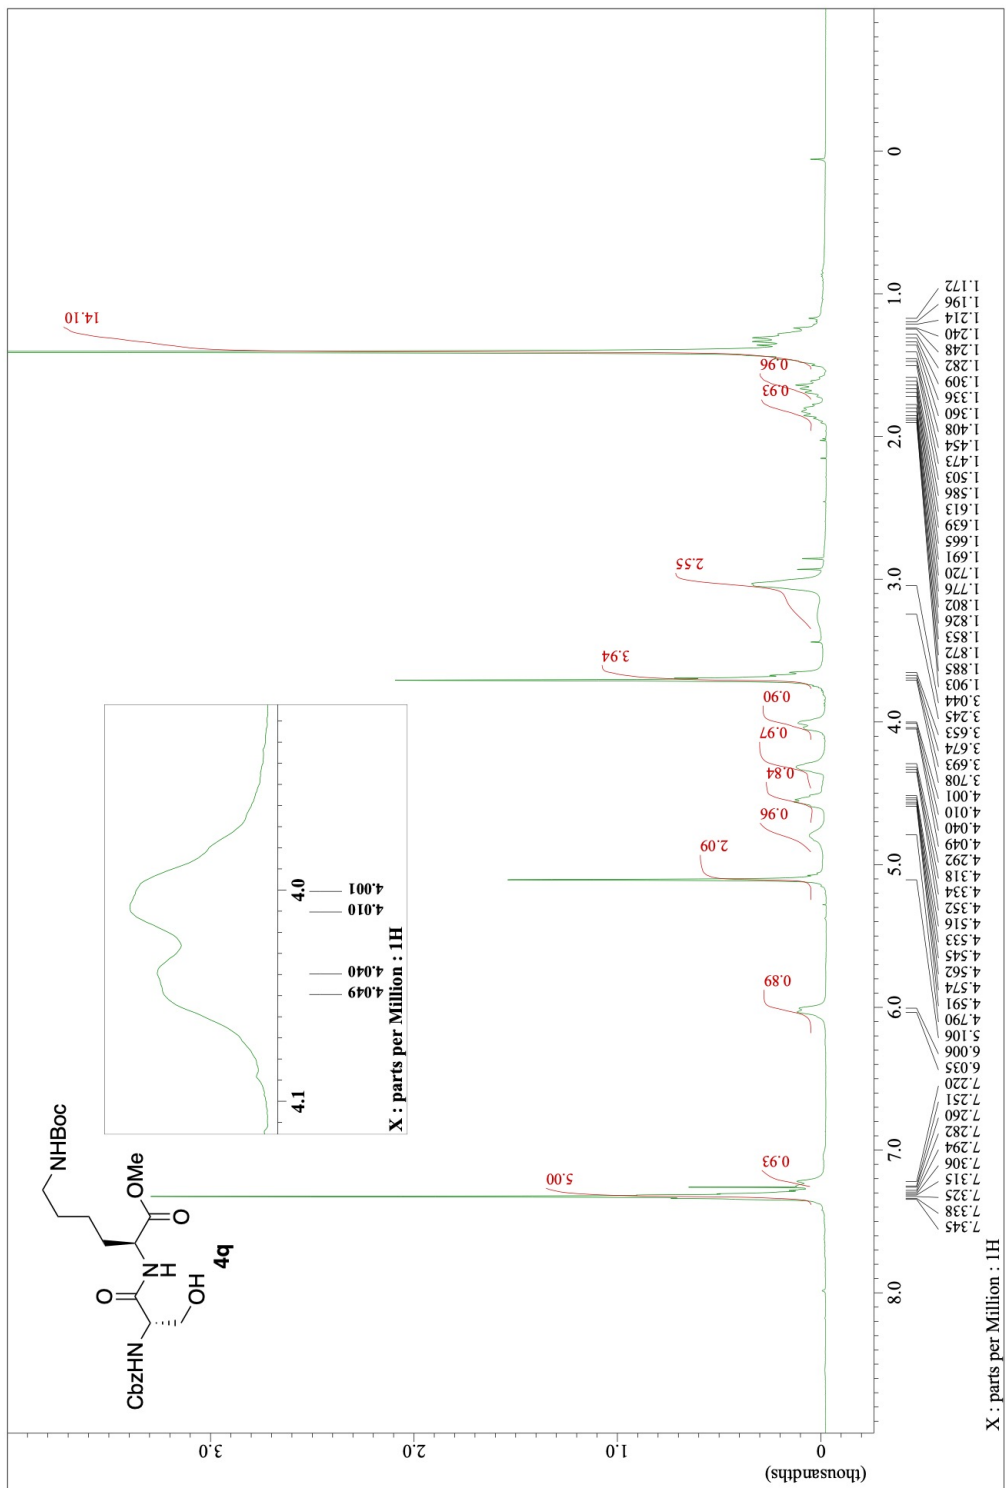

**<sup>13</sup>C NMR spectrum of 4q (126 MHz, CDCl<sub>3</sub>)**

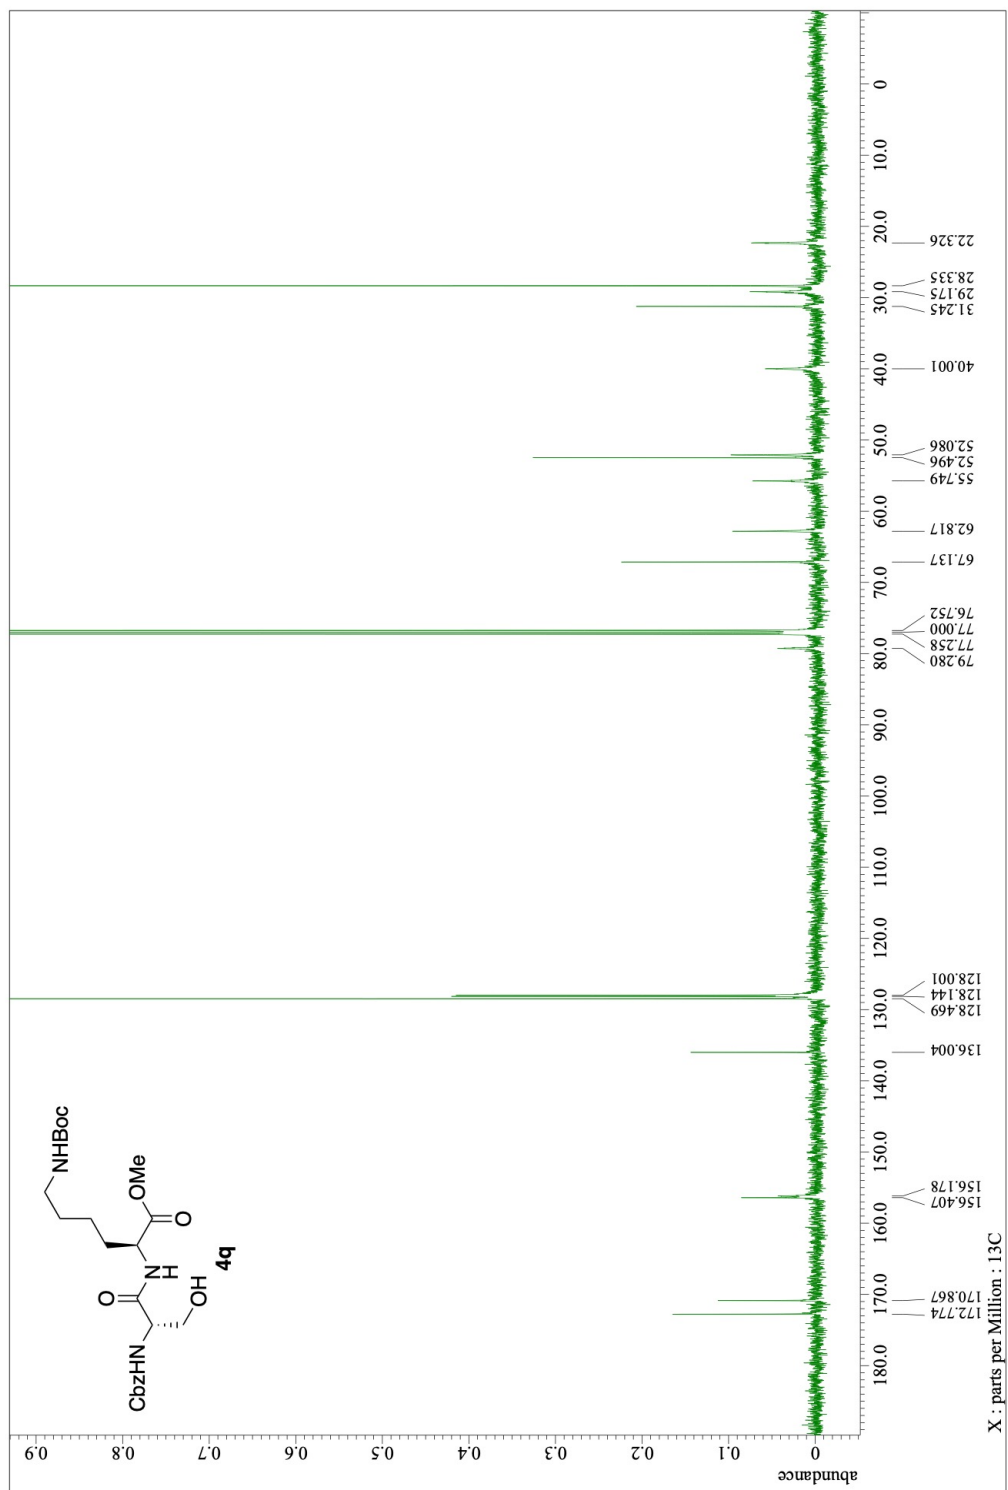

**<sup>1</sup>H NMR spectrum of 4r (500 MHz, CDCl<sub>3</sub>)**

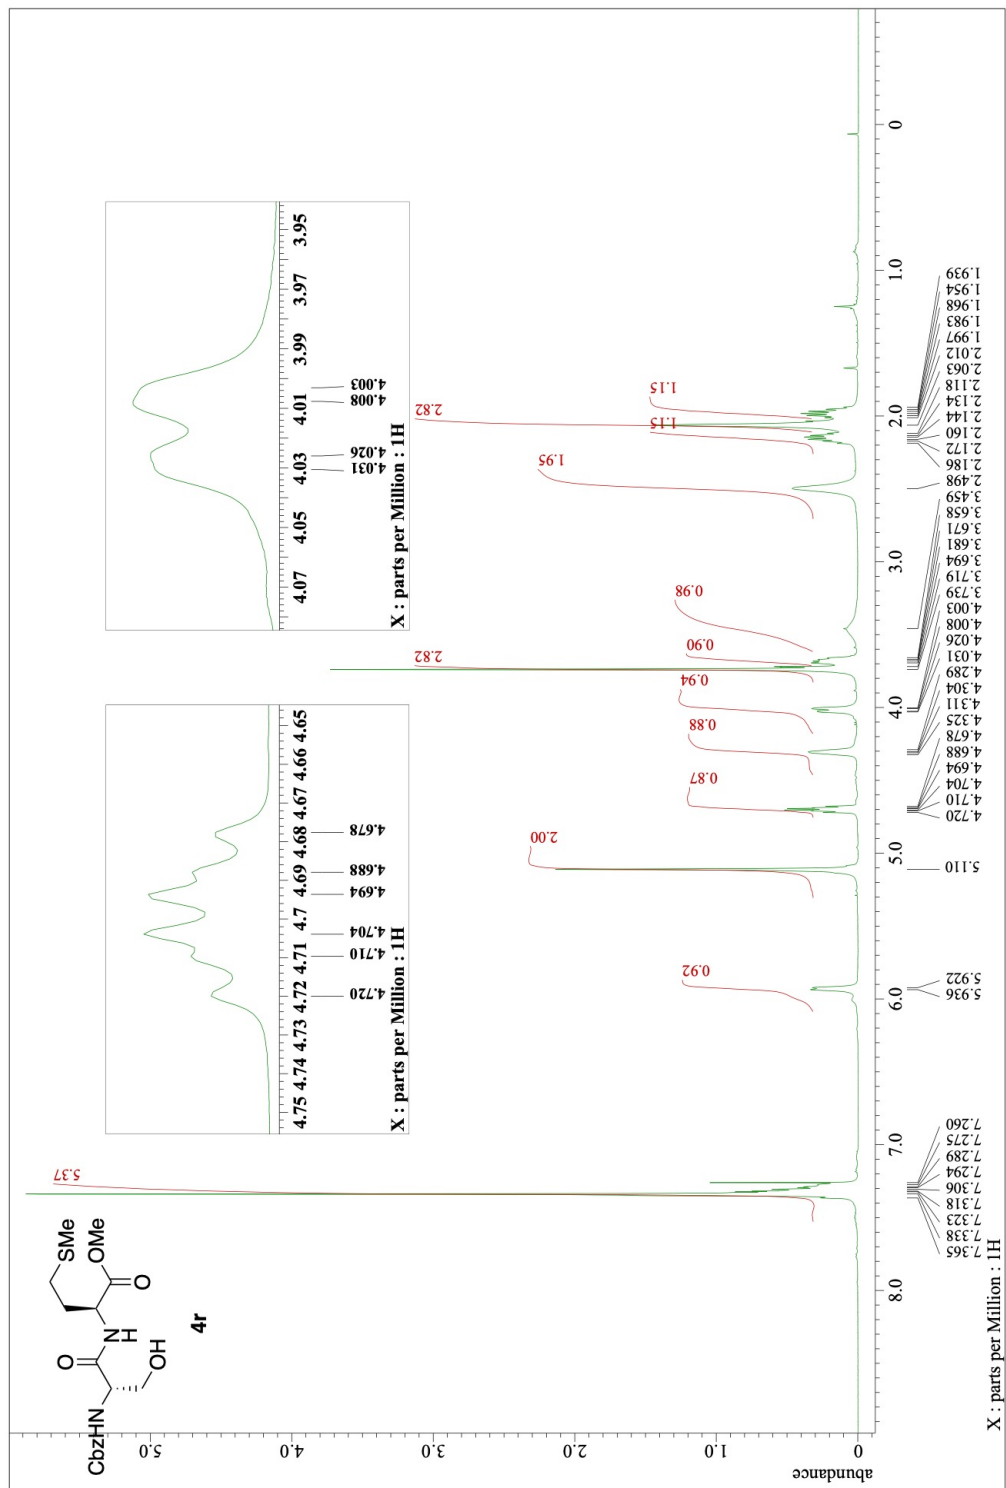

**<sup>13</sup>C NMR spectrum of 4r (126 MHz, CDCl<sub>3</sub>)**

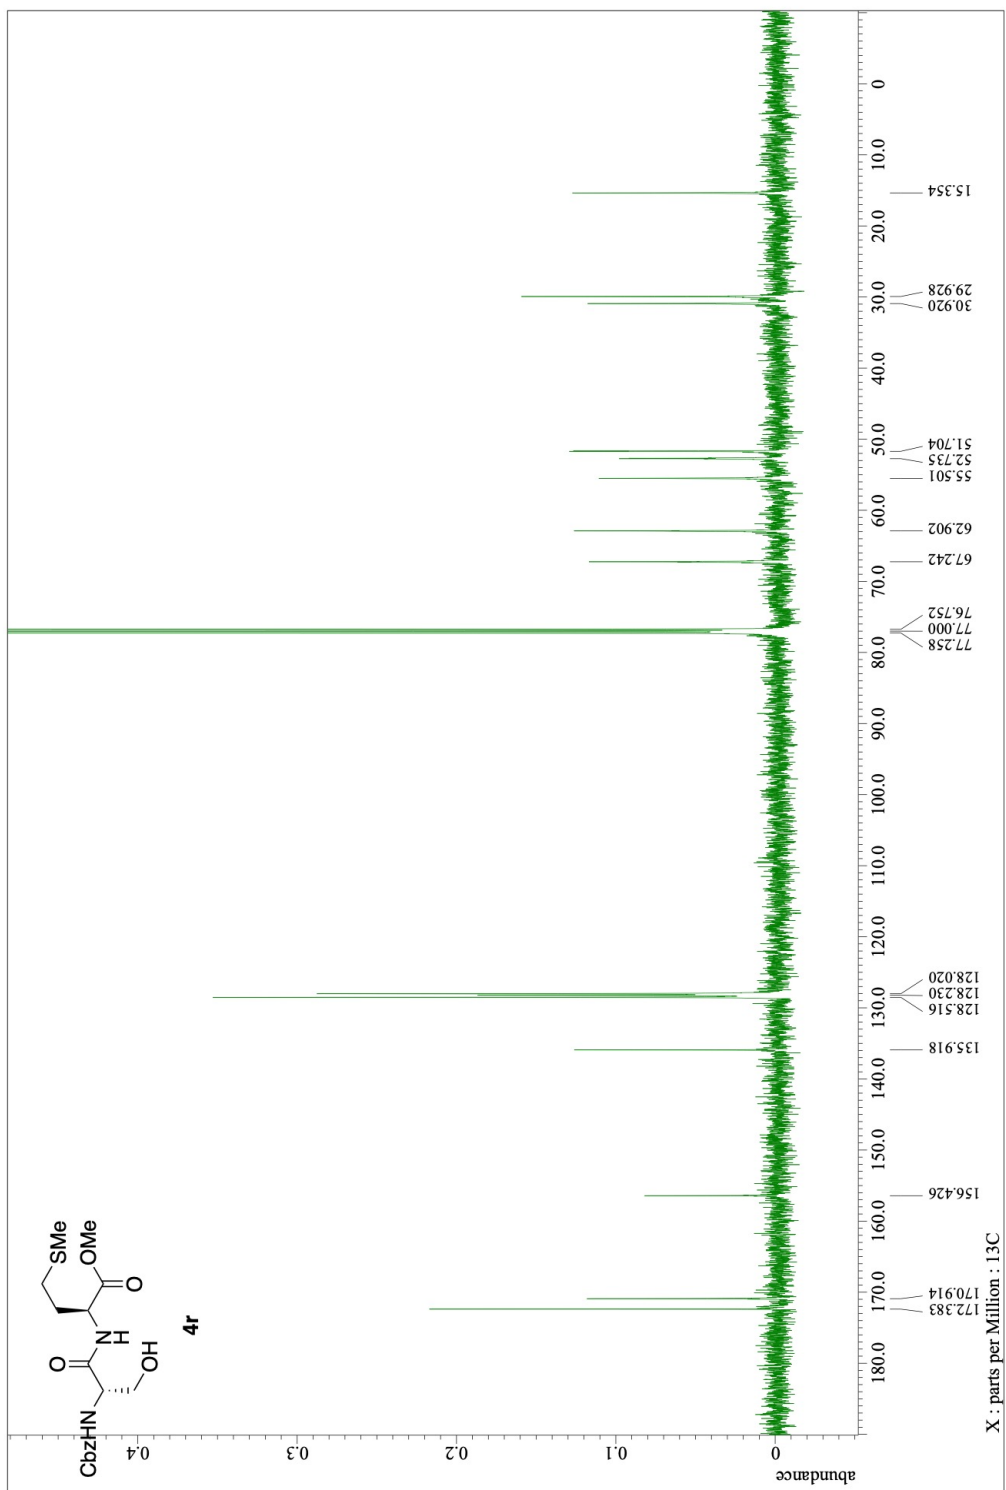

# <sup>1</sup>H NMR spectrum of 4s (500 MHz, CDCl<sub>3</sub>)

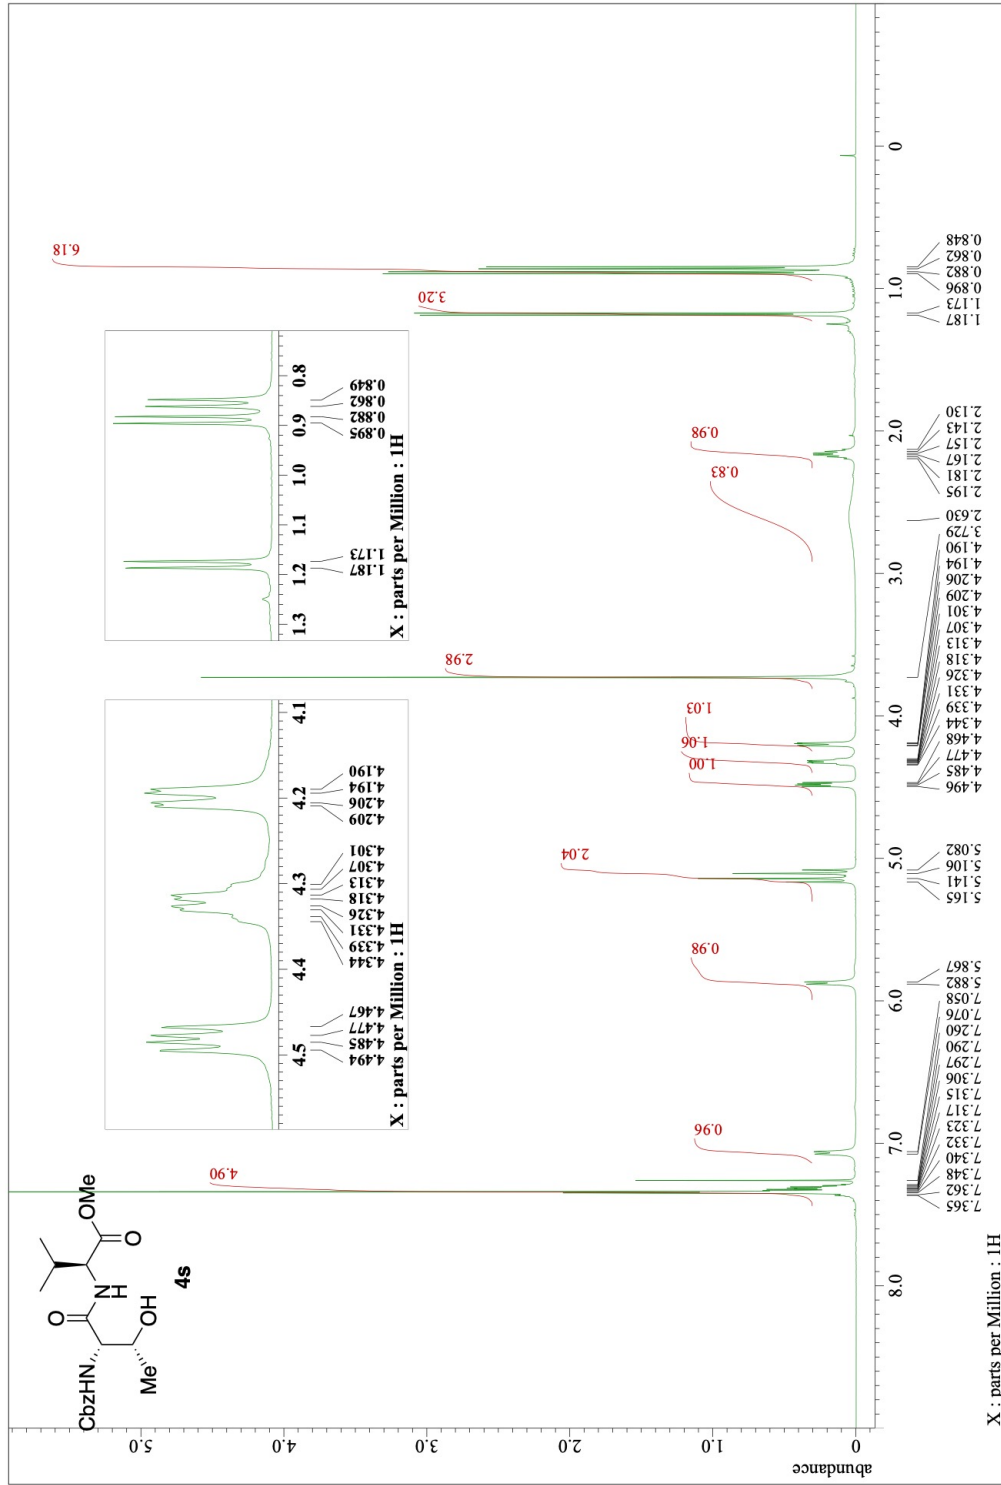



**<sup>13</sup>C NMR spectrum of 4s (126 MHz, CDCl<sub>3</sub>)**

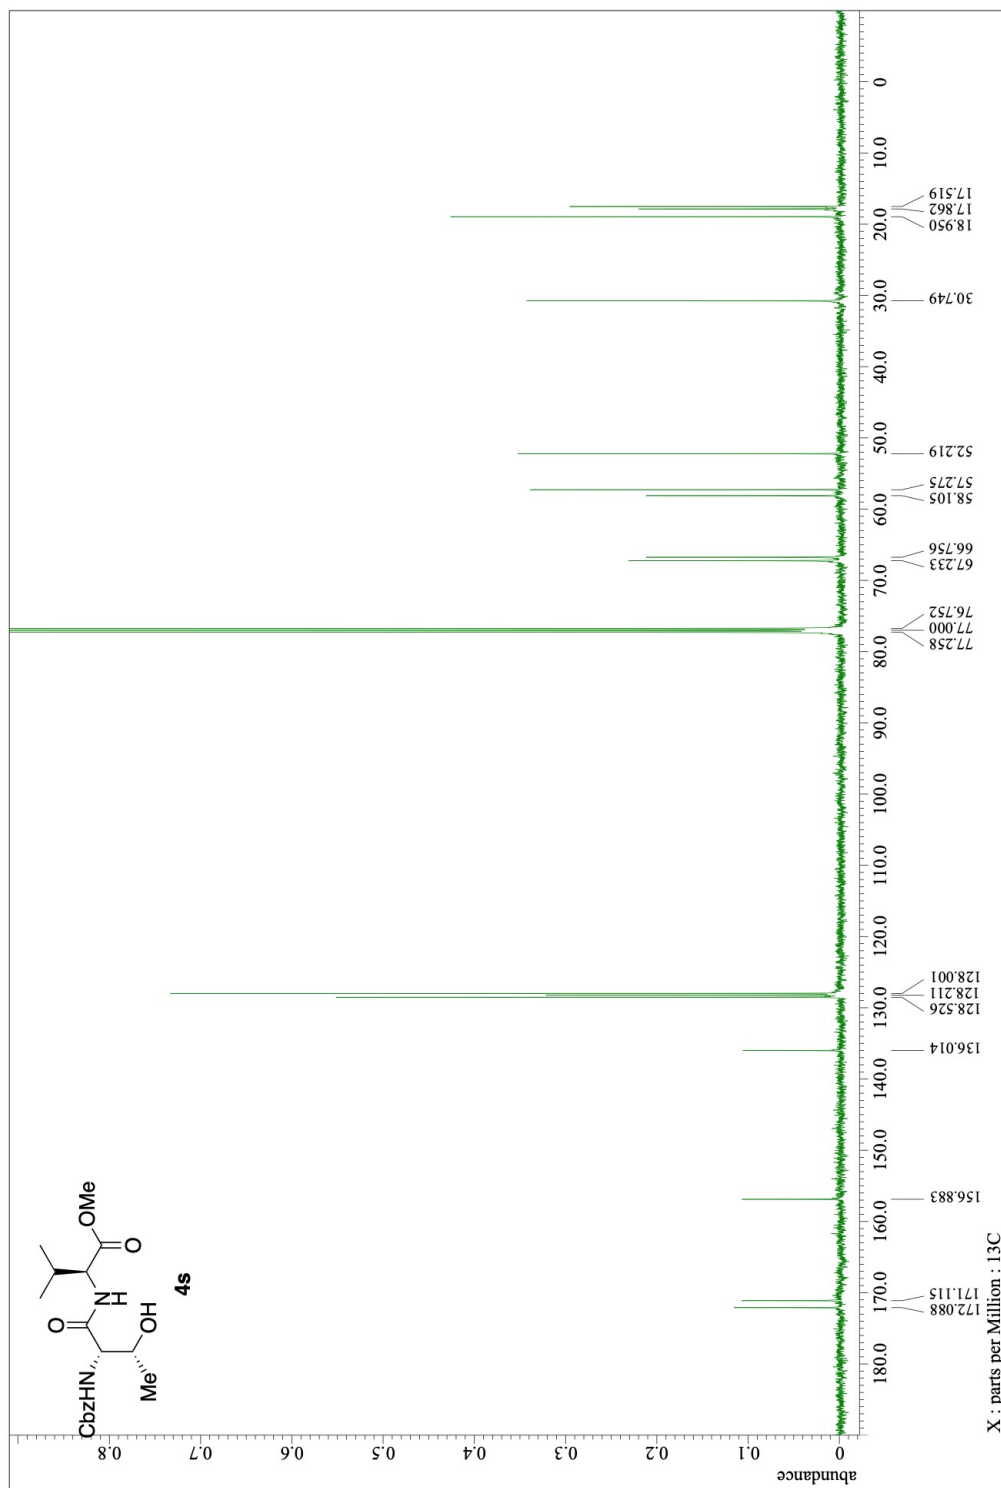

**<sup>1</sup>H NMR spectrum of 9 (500 MHz, CDCl<sub>3</sub>)**

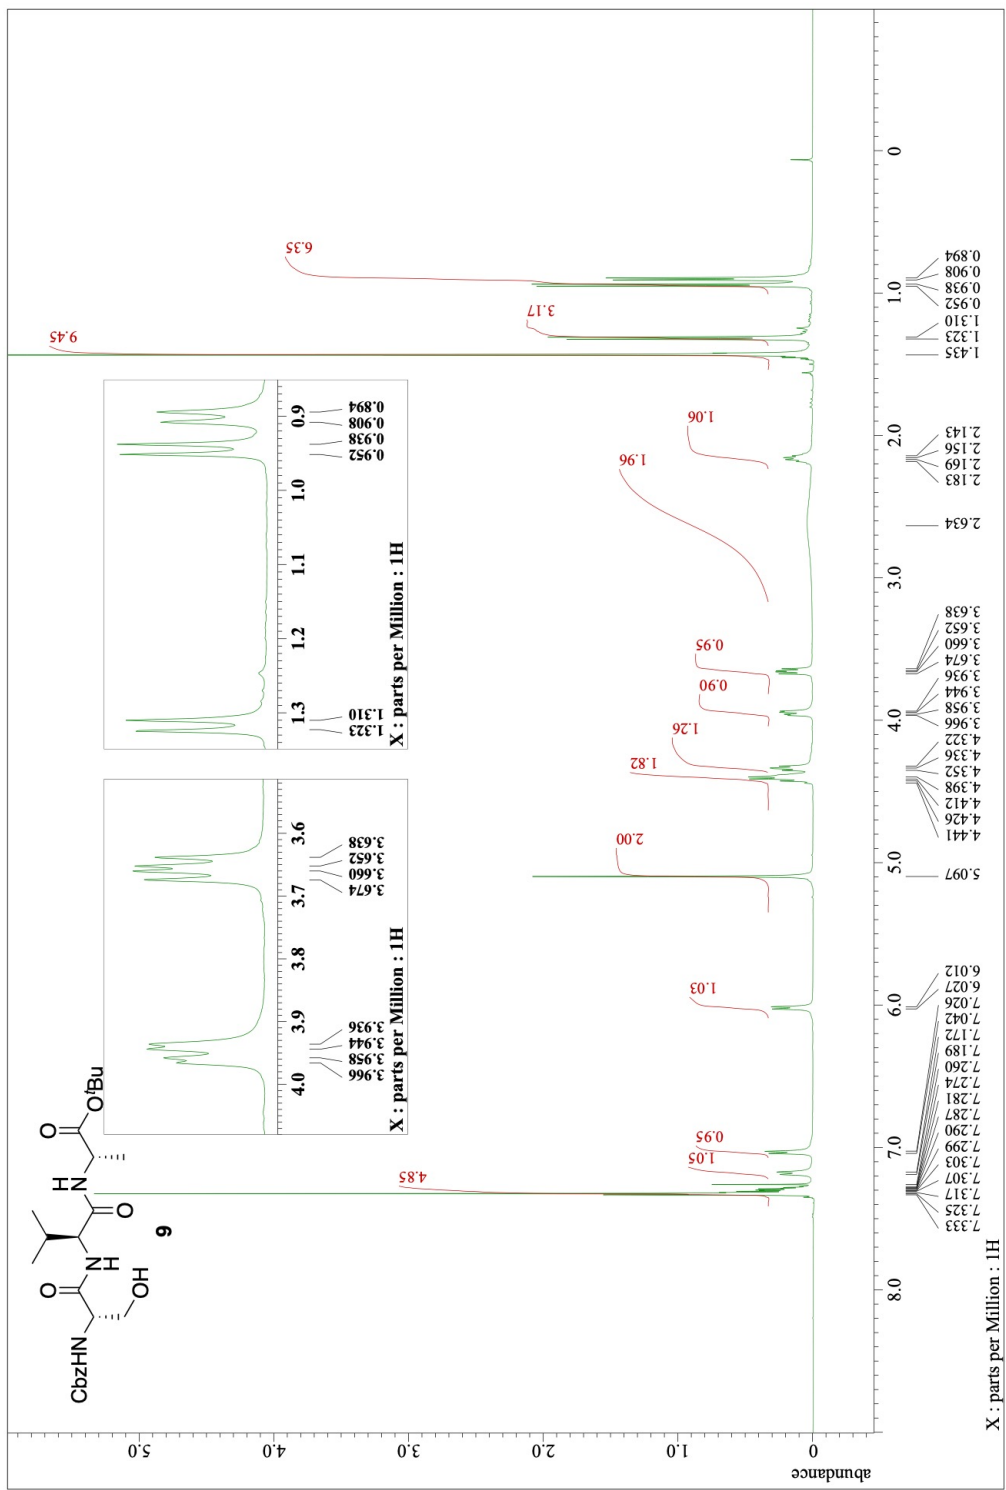

**<sup>13</sup>C NMR spectrum of 9 (126 MHz, CDCl<sub>3</sub>)**

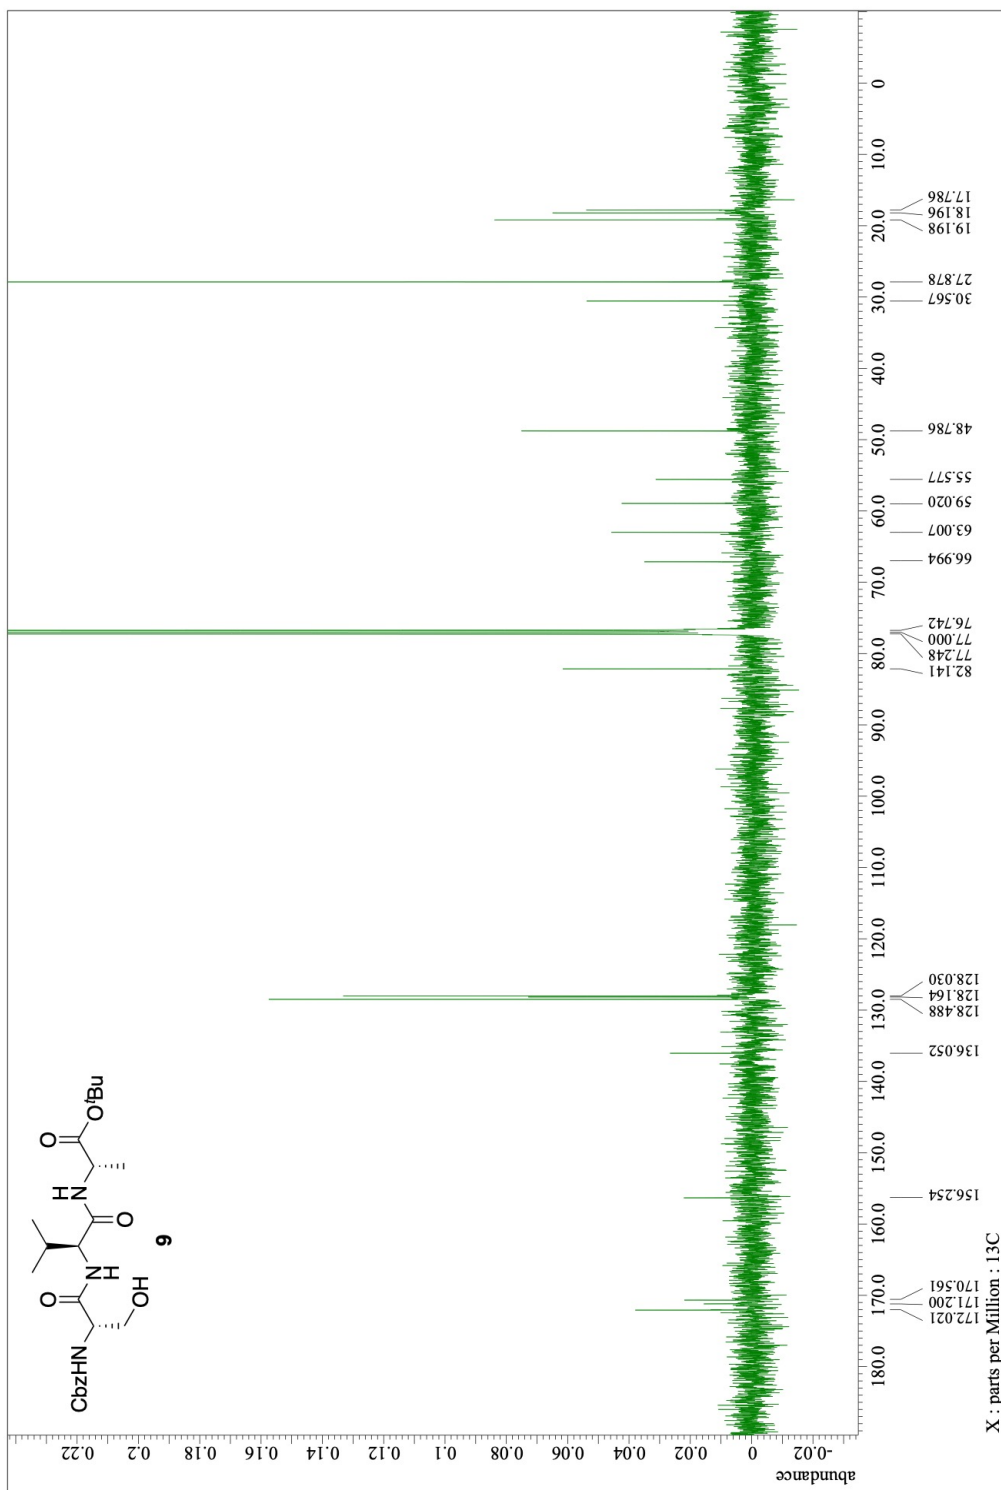

**<sup>1</sup>H NMR spectrum of 11 (270 MHz, CDCl<sub>3</sub>)**

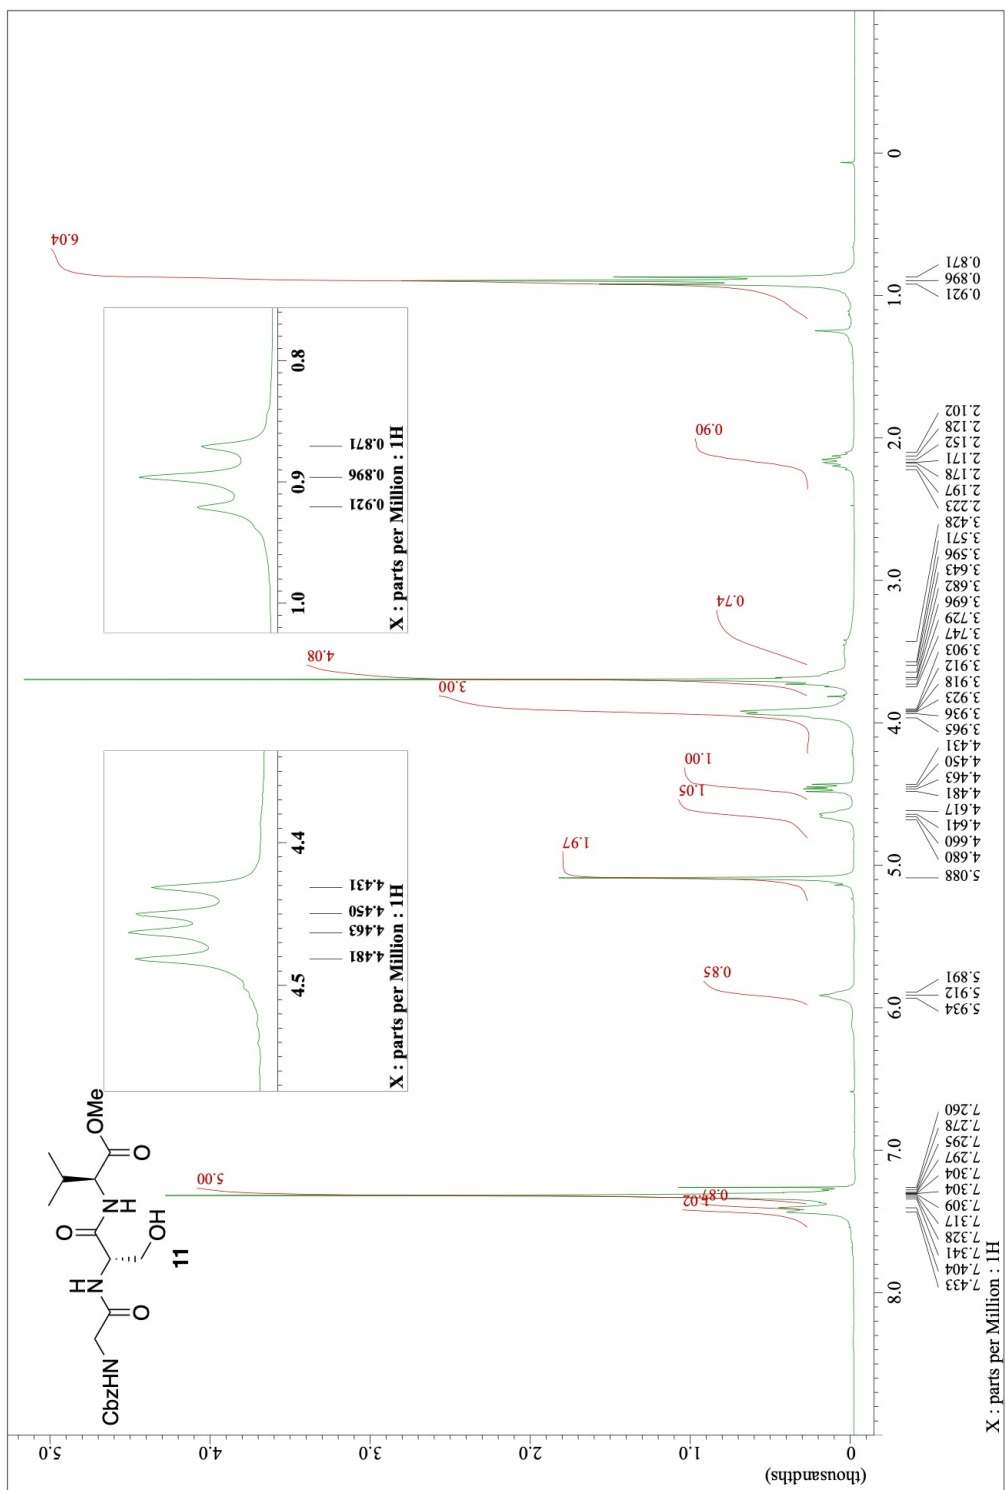

**<sup>13</sup>C NMR spectrum of 11 (126 MHz, CDCl<sub>3</sub>)**

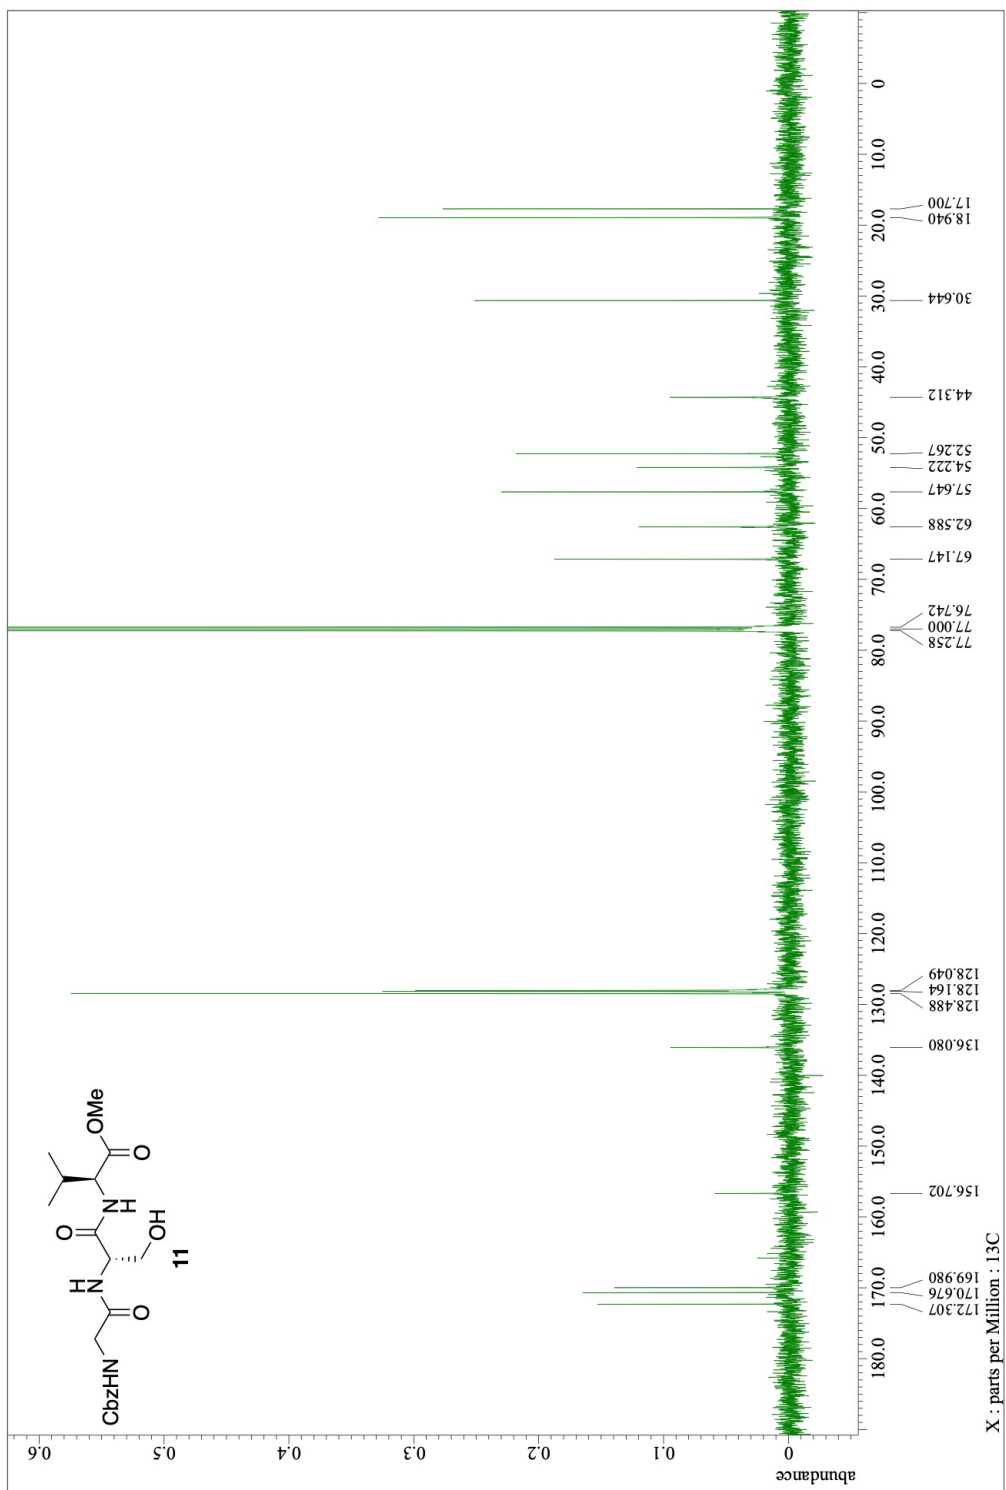

**<sup>1</sup>H NMR spectrum of 12 (270 MHz, CDCl<sub>3</sub>)**

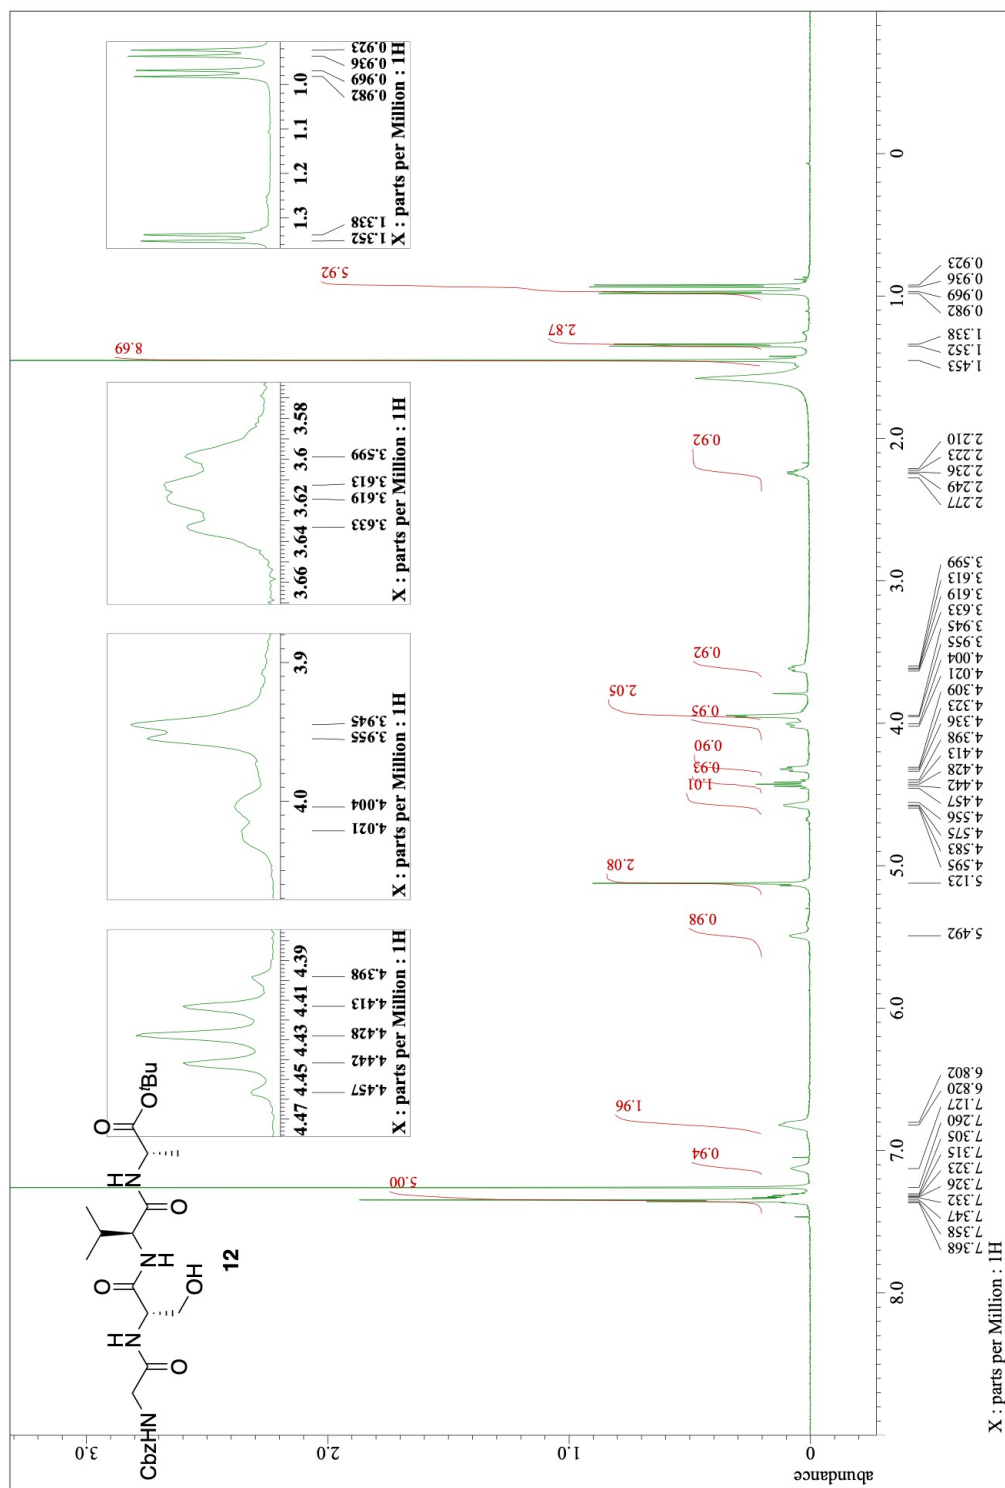

**$^{13}\text{C}$  NMR spectrum of 12 (126 MHz,  $\text{CDCl}_3$ )**

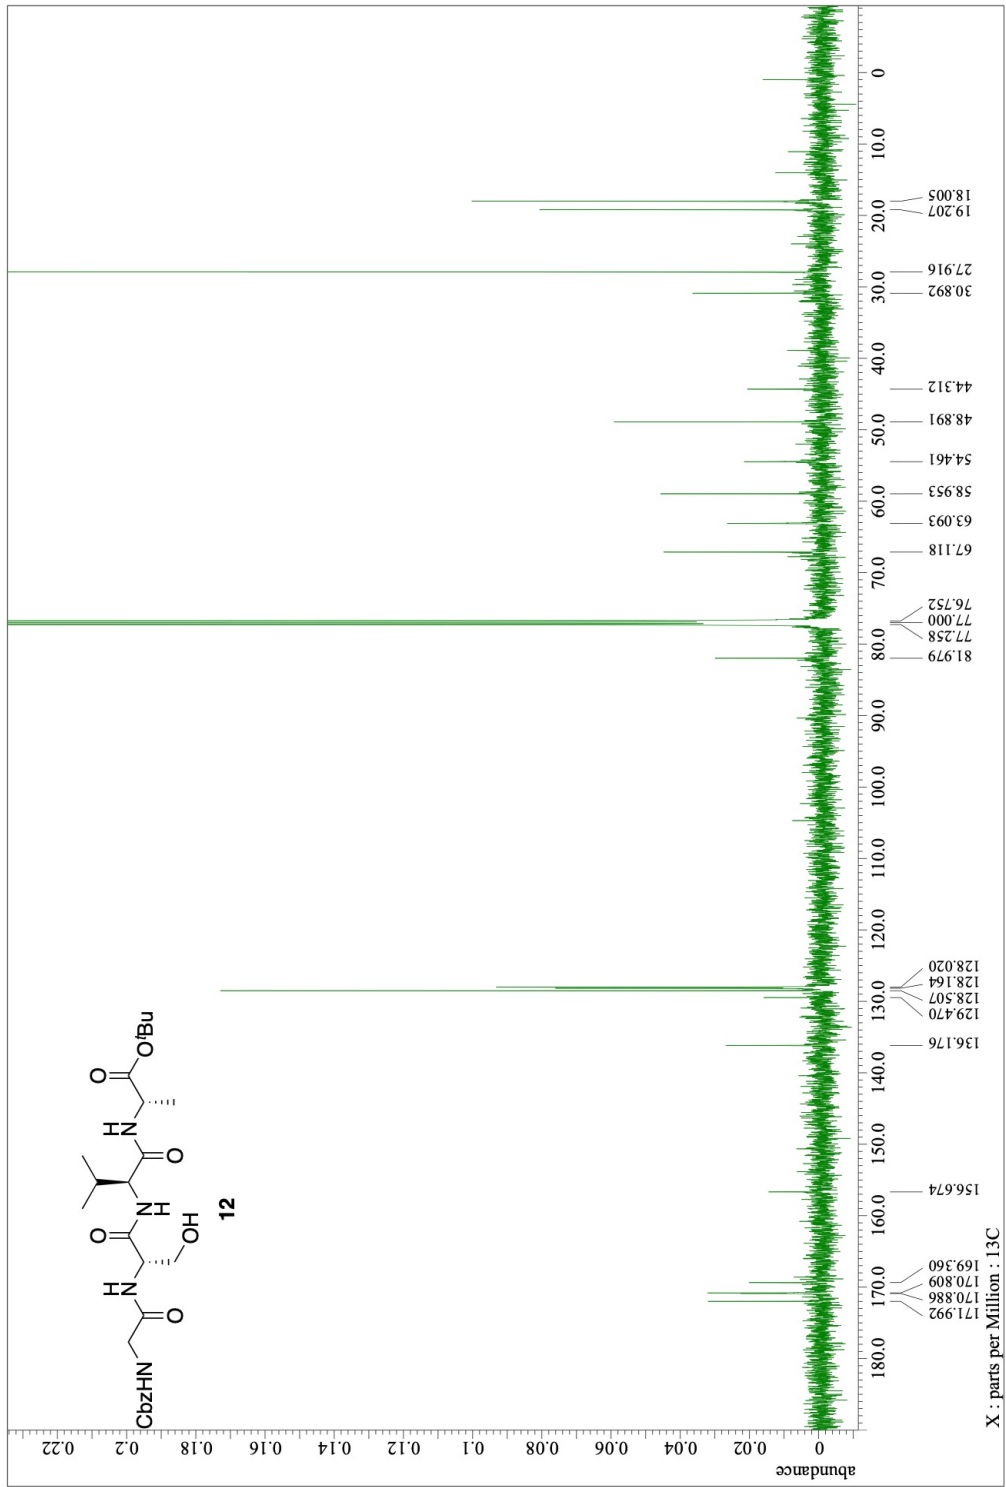

Supplement: d3cc04856j1.pdf [file d3cc04856j1.pdf]
